# Supplementary material for: Ortho-quinone methide driven synthesis of kynurenic acid lactams
Source: Royal Society of Chemistry journal article supplement (doi:10.1039/d4ra04341c), 2024-01-01
Supplement: d4ra04341c1.pdf [file d4ra04341c1.pdf]

*Supplementary Information*

# Ortho-quinone methide driven synthesis of kynurenic acid lactams

Julián Robin Sárík<sup>a</sup>, Anasztázia Hetényi<sup>b</sup>, Róbert Berkecz<sup>c,d</sup>, István Szatmári<sup>a,c,\*</sup> and Bálint Lőrinczi<sup>a,\*</sup>

<sup>a</sup>Institute of Pharmaceutical Chemistry, University of Szeged, Eötvös u. 6, H-6720 Szeged, Hungary

<sup>b</sup>Department of Medical Chemistry, University of Szeged, Dóm tér 8, H-6720 Szeged, Hungary

<sup>c</sup>Institute of Pharmaceutical Analysis, University of Szeged, H-6720 Szeged, Somogyi u. 4, Hungary

<sup>d</sup>Department of Forensic Medicine, Albert Szent-Györgyi Health Centre, H-6724 Szeged, Kossuth Lajos sgt. 40, Hungary

<sup>e</sup>HUN-REN SZTE Stereochemistry Research Group, University of Szeged, Eötvös u. 6, H-6720 Szeged, Hungary

## Contents

|                                                                                              |     |
|----------------------------------------------------------------------------------------------|-----|
| 1. <sup>1</sup> H, <sup>13</sup> C, HSQC and HMBC NMR spectra of synthesized compounds ..... | 2.  |
| 2. HR-MS spectra of synthesized compounds .....                                              | 39. |

4-oxo-N-phenyl-1,4-dihydroquinoline-2-carboxamide (7a):

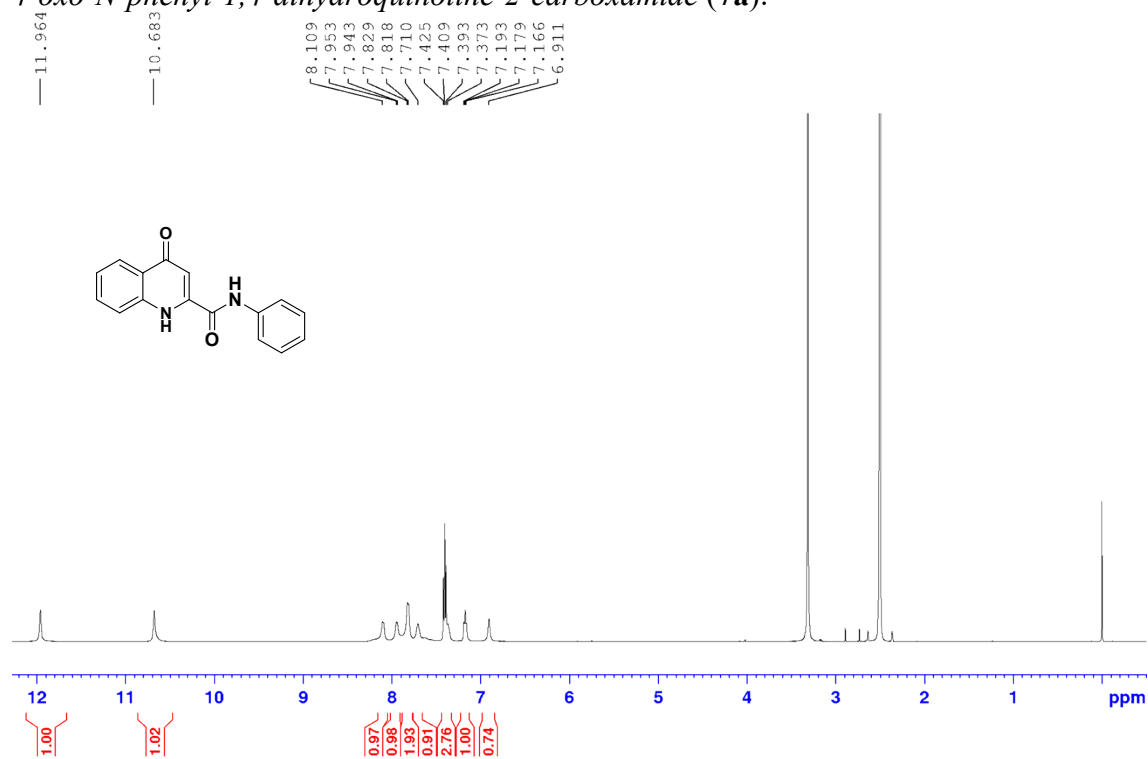

Figure S1. <sup>1</sup>H-NMR spectrum of 7a

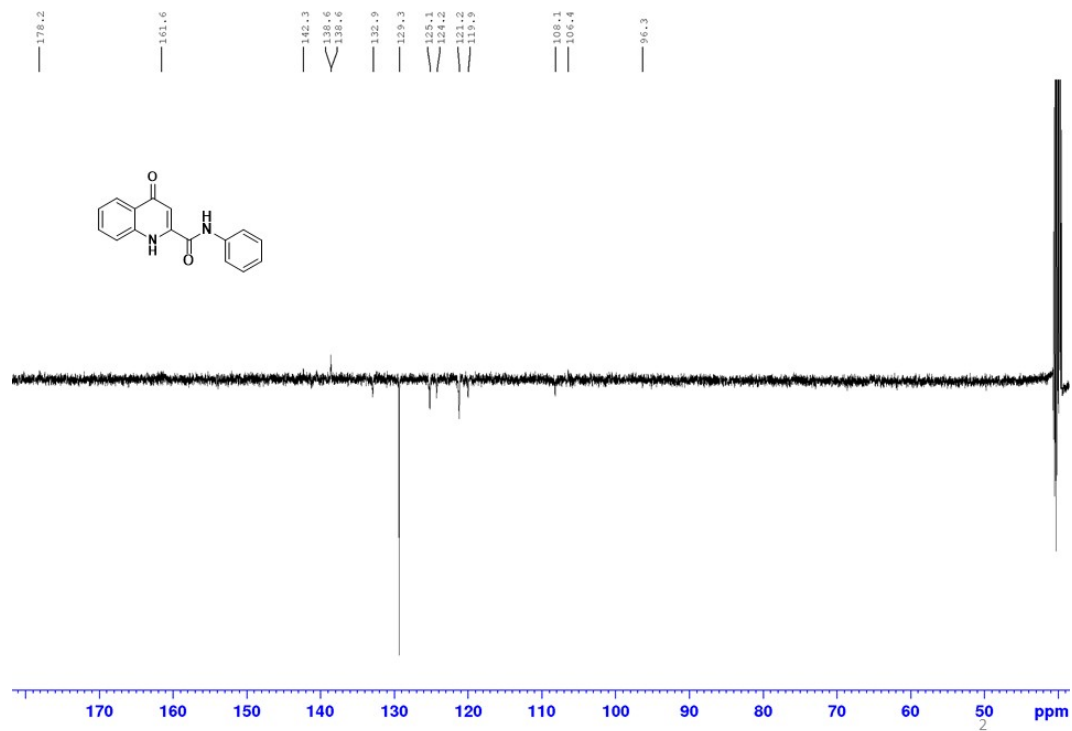

Figure S2. <sup>13</sup>C-NMR spectrum of 7a

*N*-benzyl-4-oxo-1,4-dihydroquinoline-2-carboxamide (**7b**):

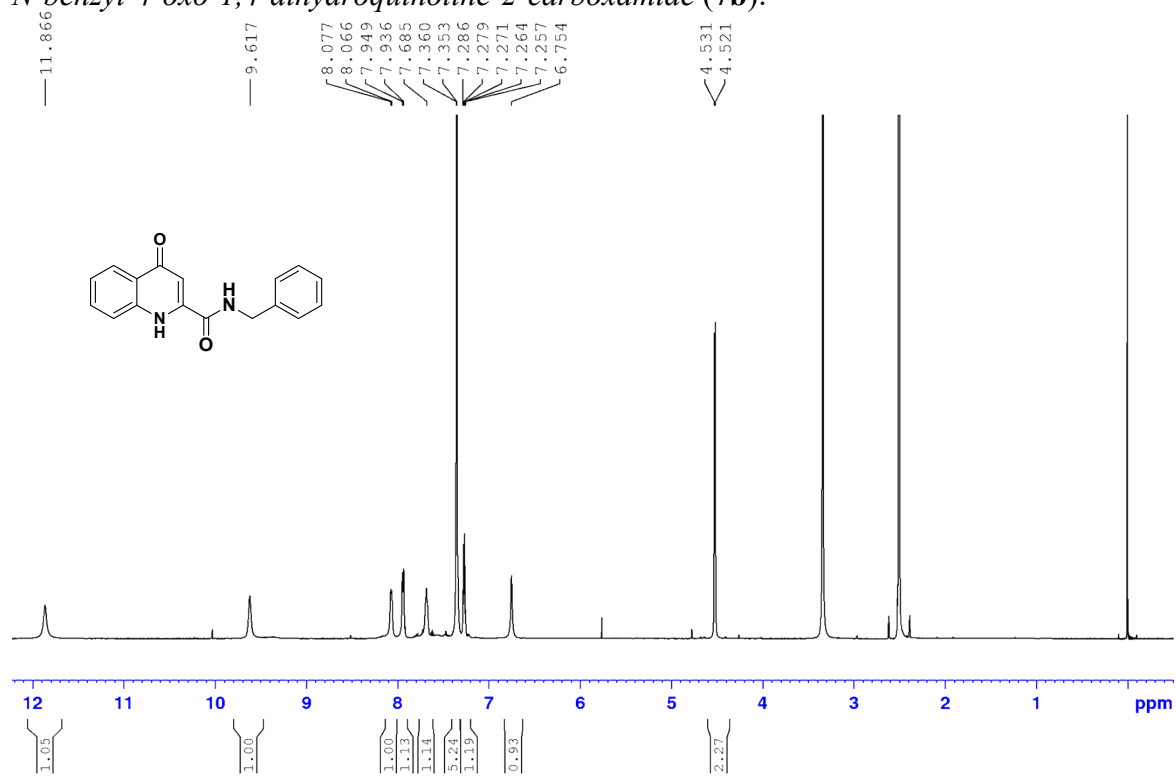

e S3. <sup>1</sup>H-NMR spectrum of **7b**

Figur

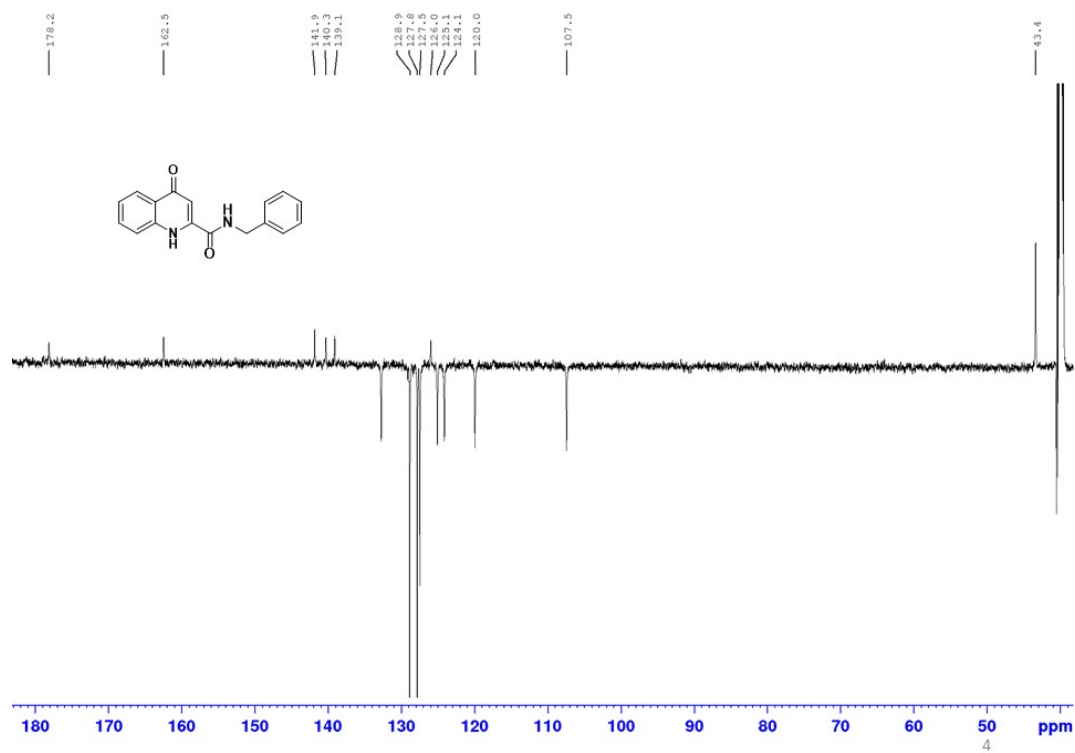

Figure S4. <sup>13</sup>C-NMR spectrum of **7b**

4-oxo-N-phenethyl-1,4-dihydroquinoline-2-carboxamide (**7c**):

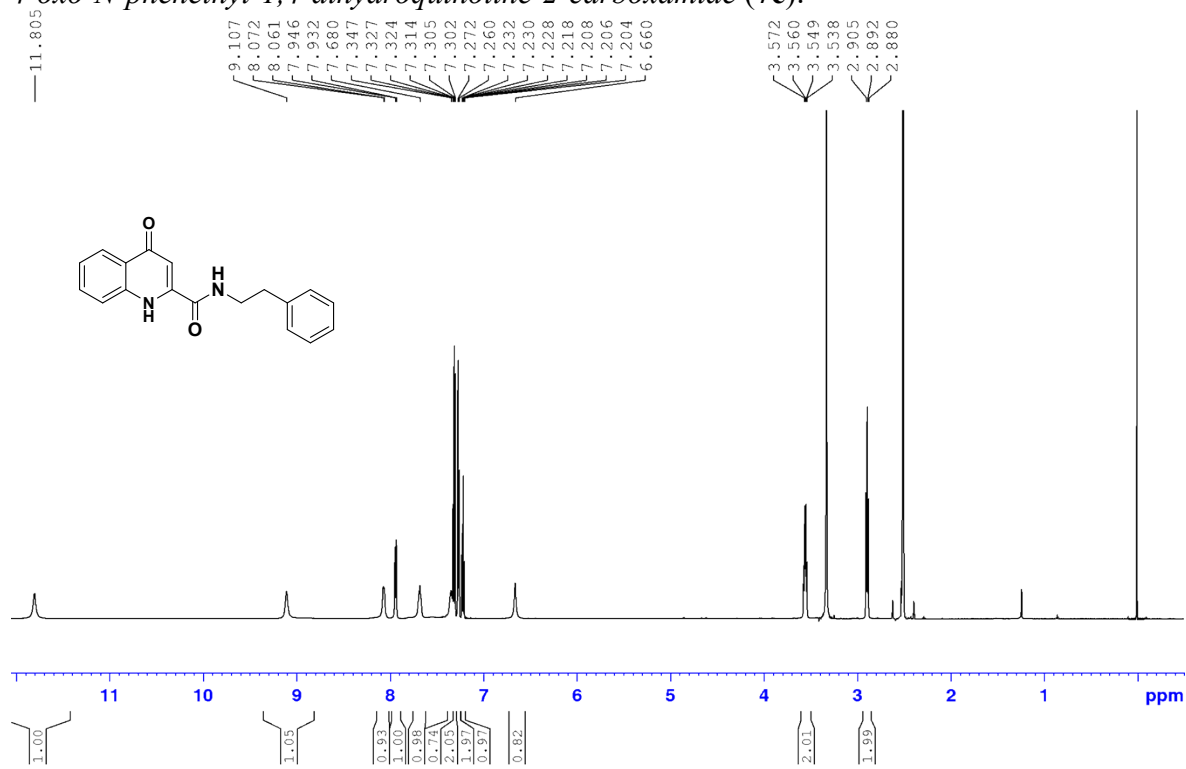

Figure

e S5. <sup>1</sup>H-NMR spectrum of **7c**

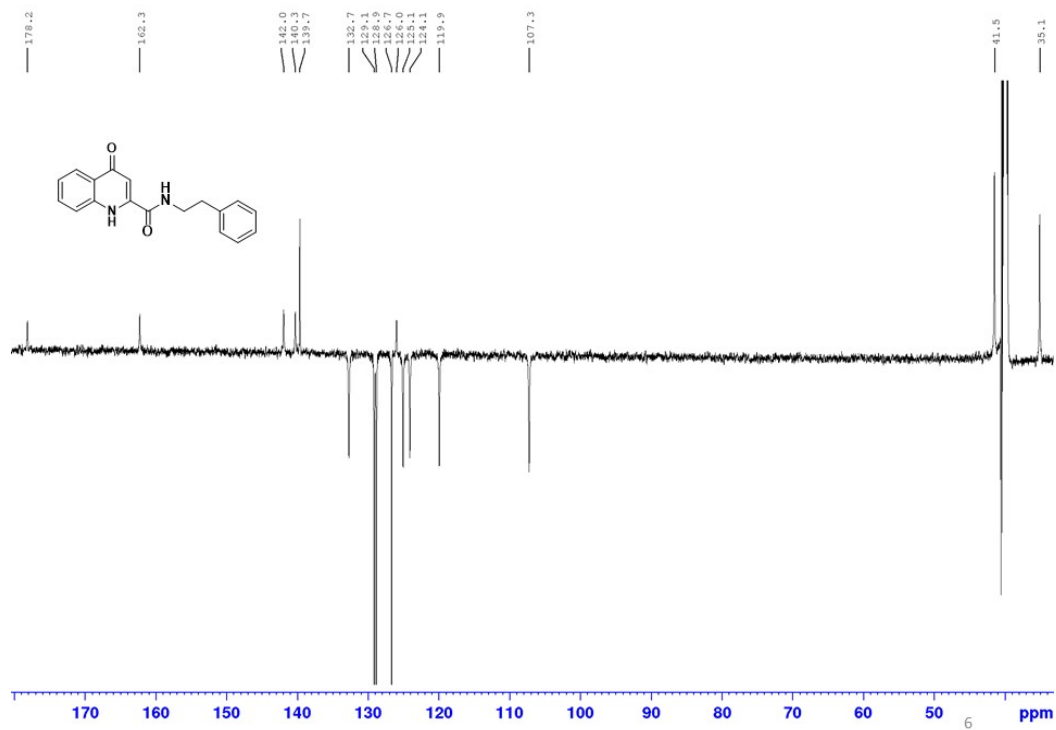

Figure S6. <sup>13</sup>C-NMR spectrum of **7c**

4-oxo-N-propyl-1,4-dihydroquinoline-2-carboxamide (7d):

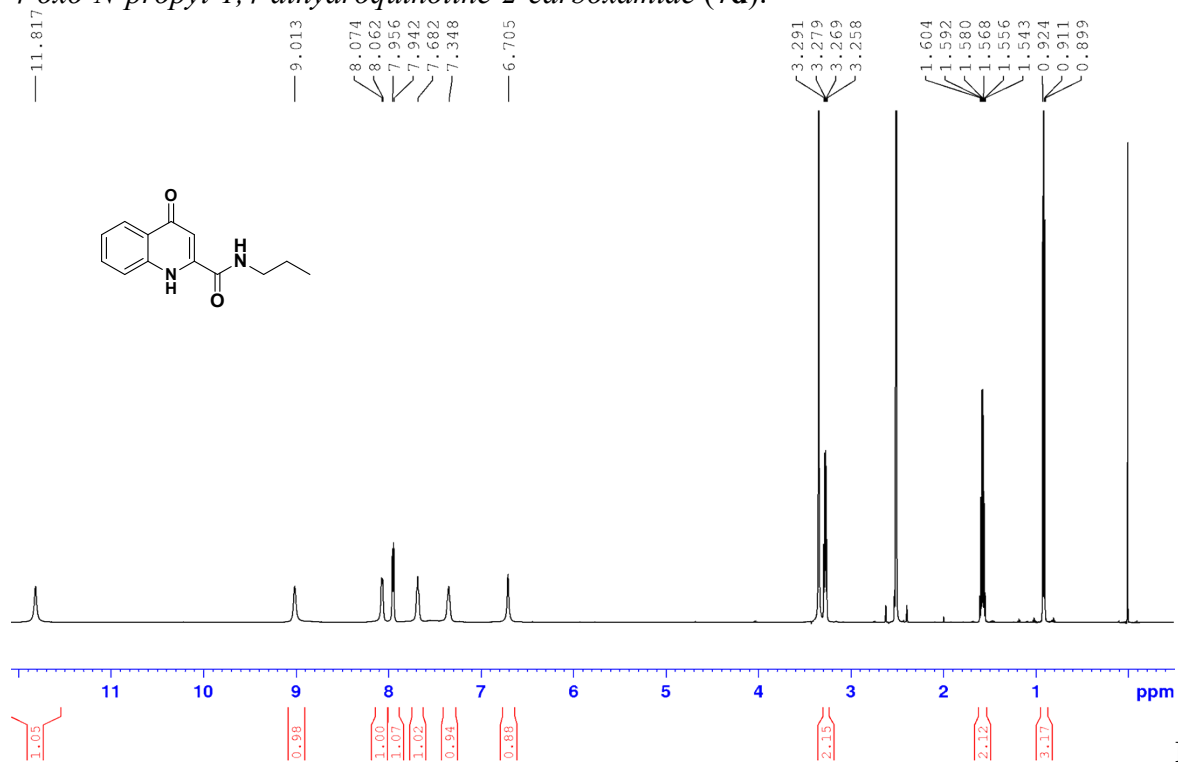

e S7. <sup>1</sup>H-NMR spectrum of 7d

Figur

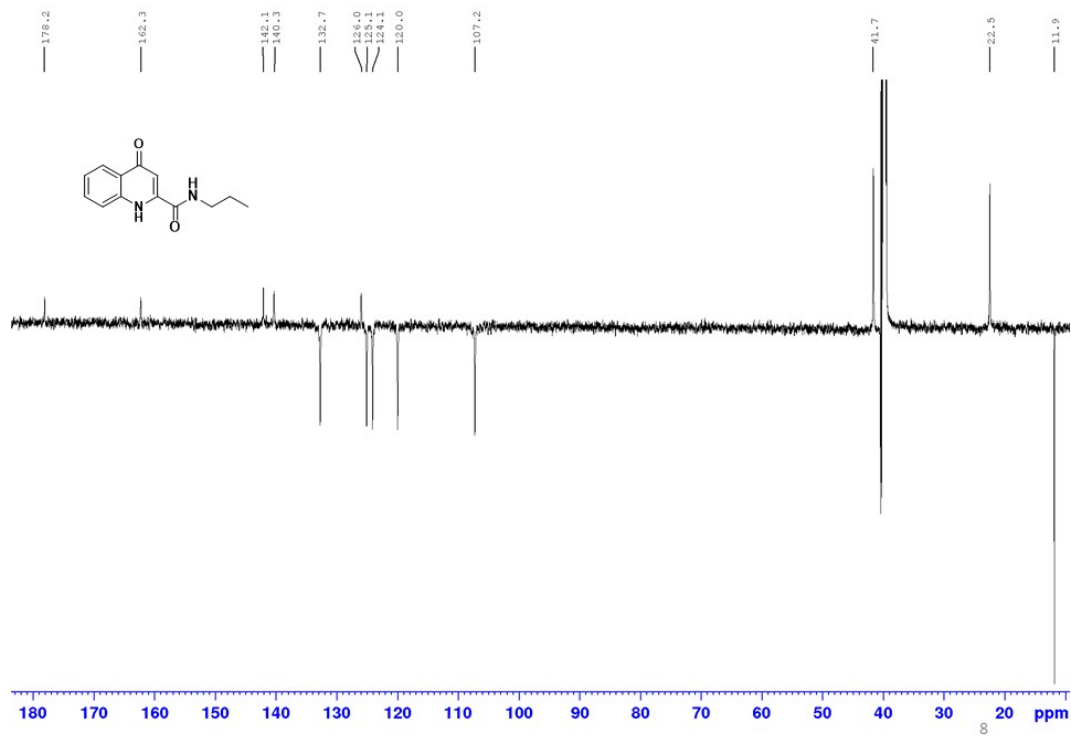

Figure S8. <sup>13</sup>C-NMR spectrum of 7d

5-Chloro-N-(2-(dimethylamino)ethyl)-4-oxo-1,4-dihydroquinoline-2-carboxamide (**12a**):

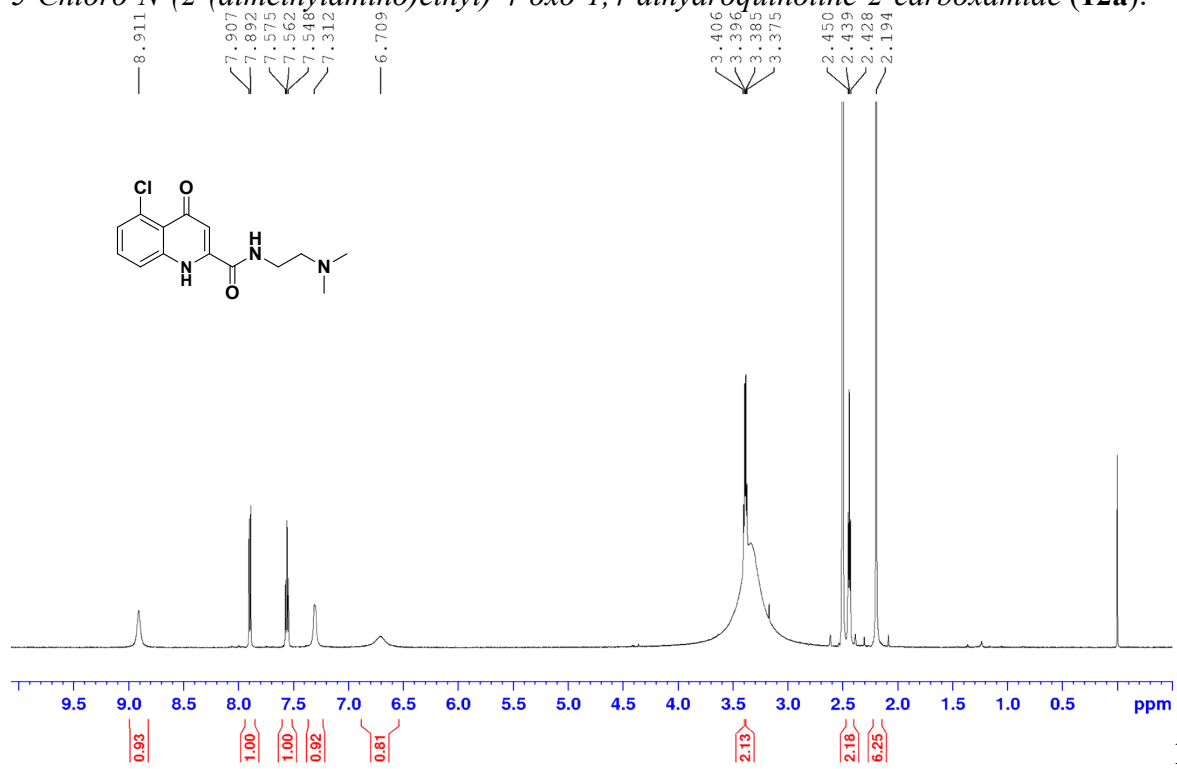

Figure

e S9. <sup>1</sup>H-NMR spectrum of **12a** in DMSO-*d*<sub>6</sub>

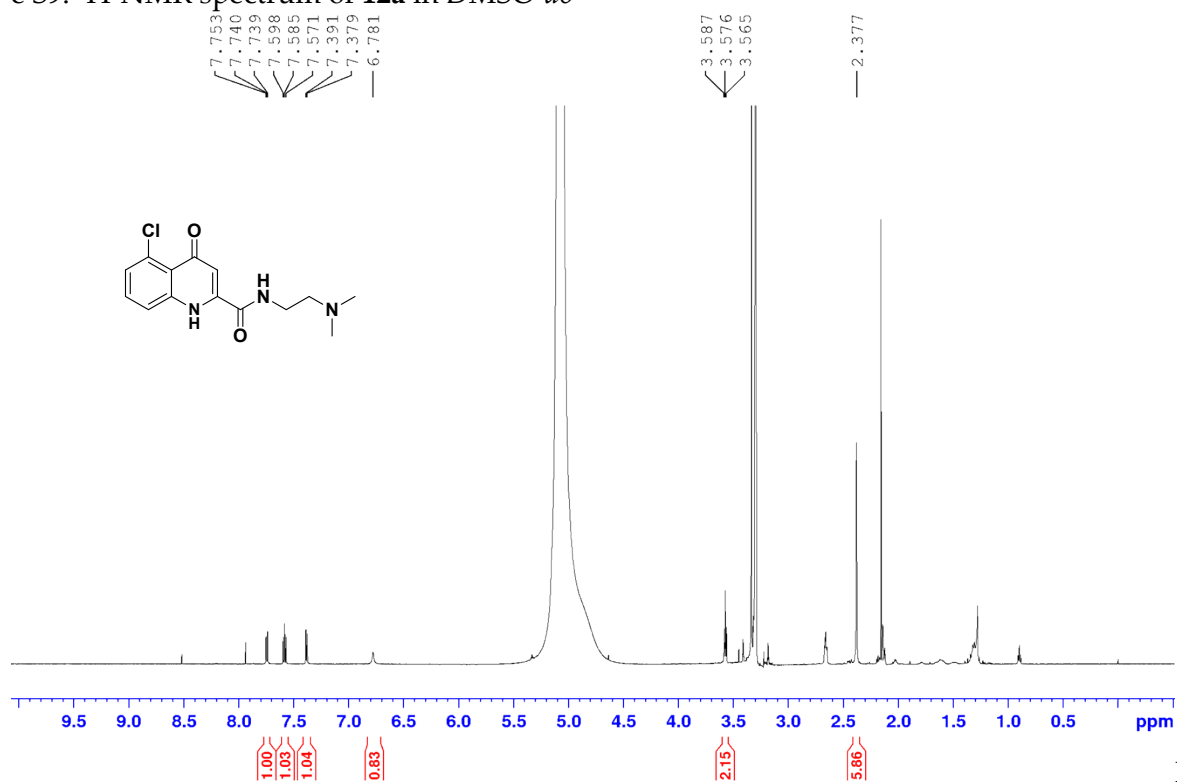

Figure

e S10. <sup>1</sup>H-NMR spectrum of **12a** in MeOD

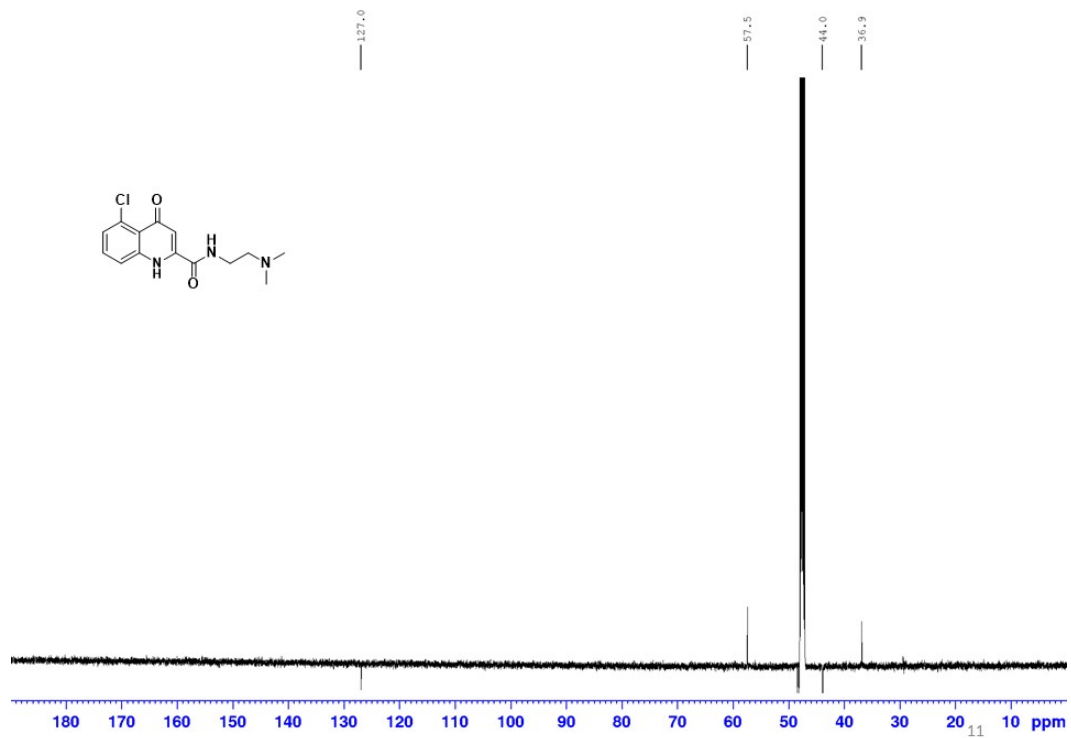

Figure S11.  $^{13}\text{C}$ -NMR spectrum of **12a** in MeOD

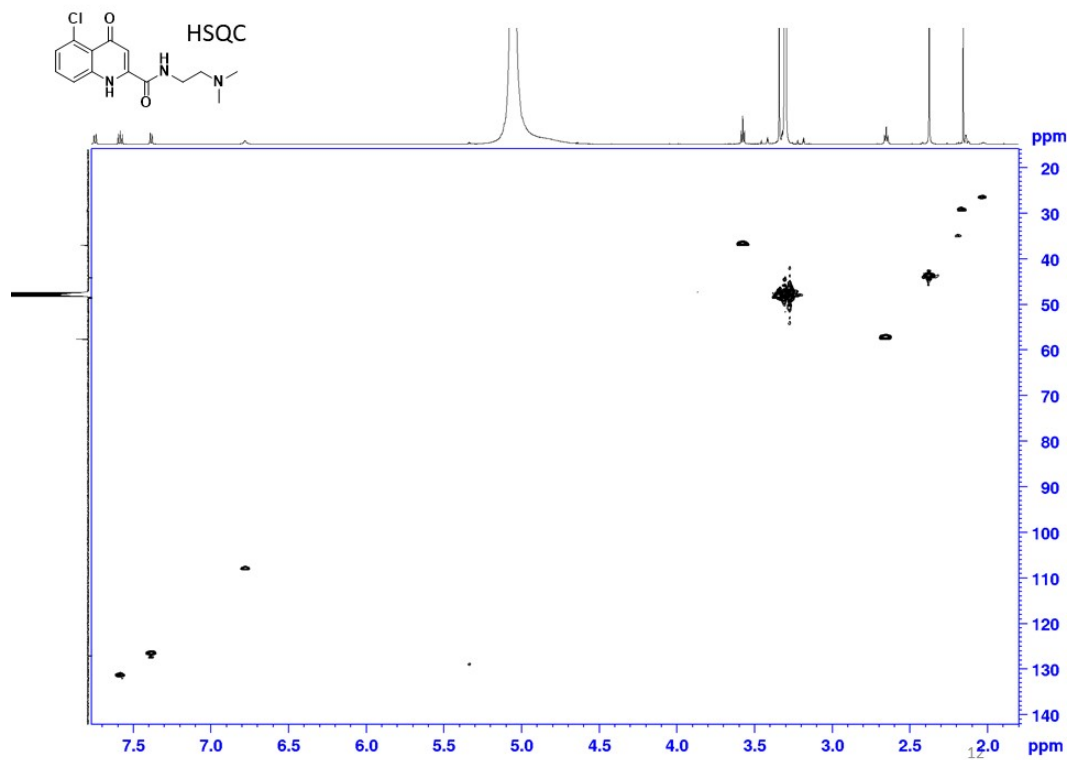

Figure S12. HSQC NMR spectrum of **12a** in MeOD

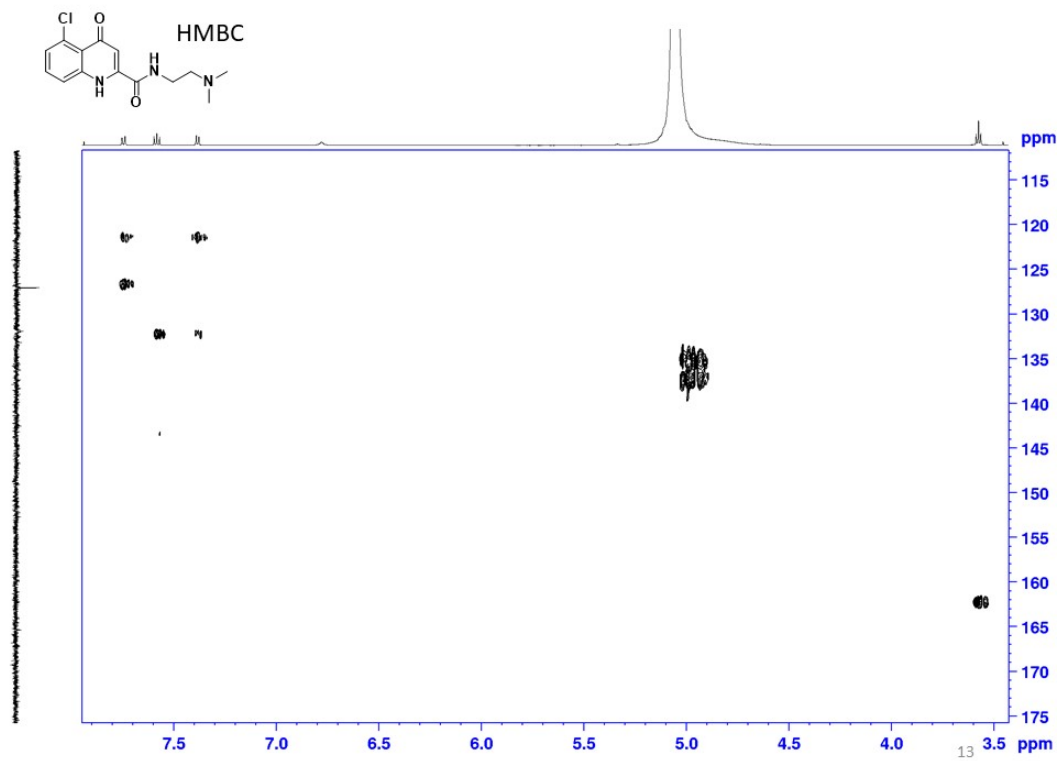

Figure S13. HMBC NMR spectrum of **12a** in MeOD



*N*-(2-(dimethylamino)ethyl)-4-oxo-6-phenyl-1,4-dihydroquinoline-2-carboxamide (**12b**):

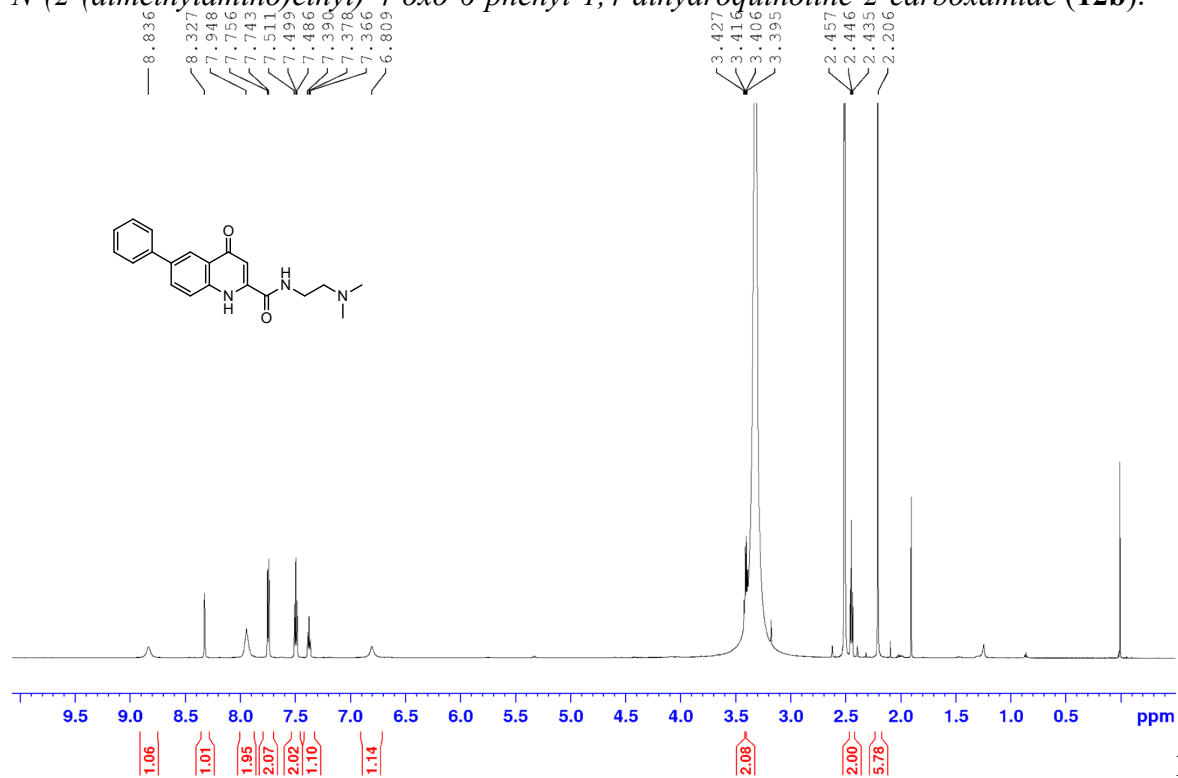

Figur

e S14. <sup>1</sup>H-NMR spectrum of **12b** in DMSO-*d*<sub>6</sub>

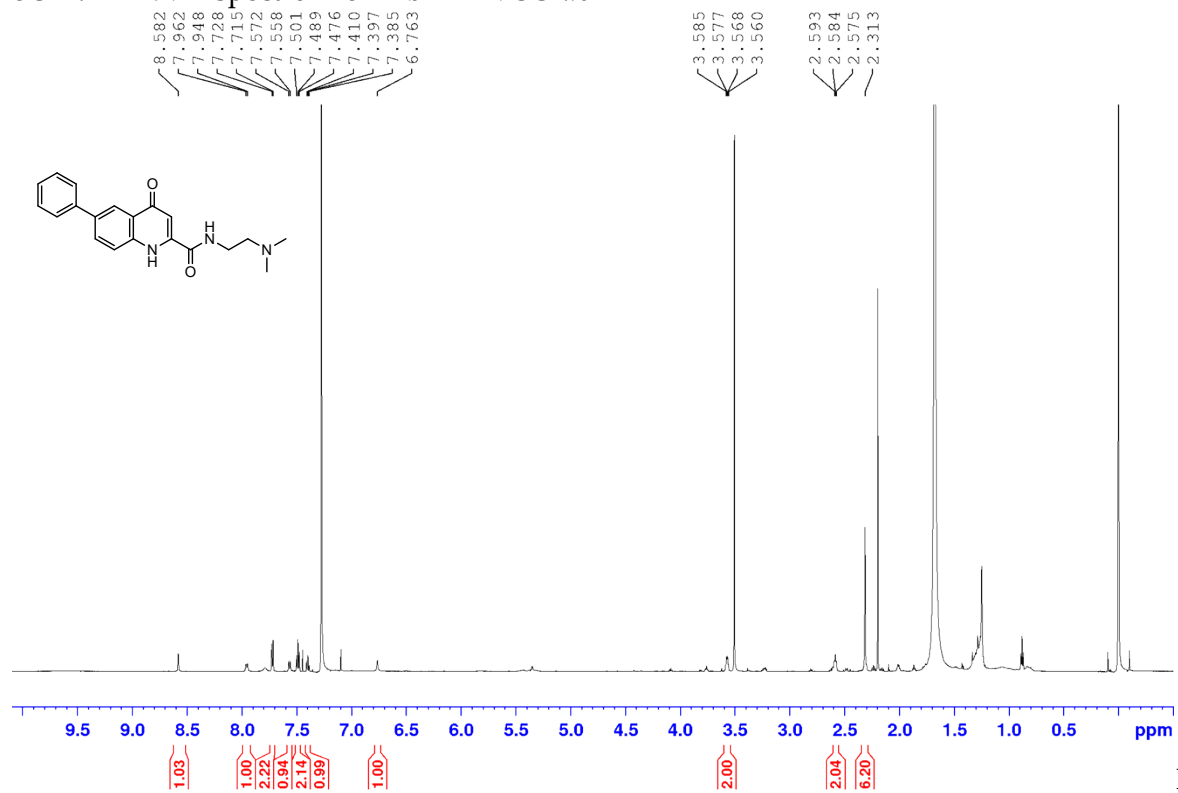

Figur

e S15. <sup>1</sup>H-NMR spectrum of **12b** in CDCl<sub>3</sub>

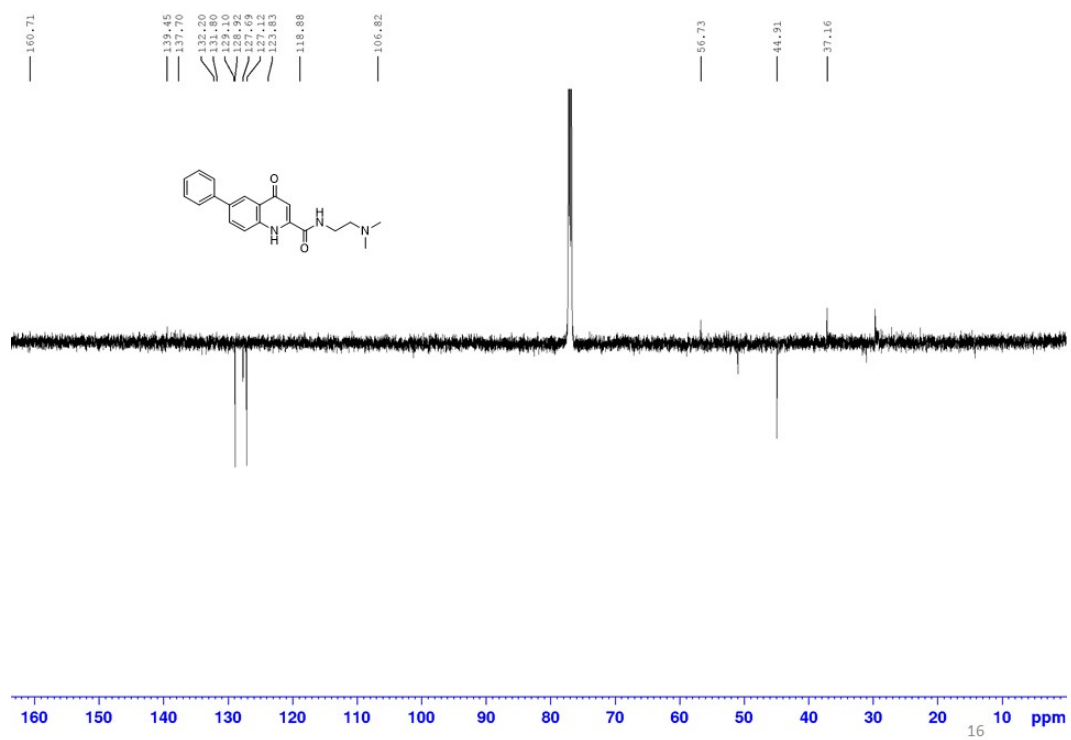

Figure S16.  $^{13}\text{C}$ -NMR spectrum of **12b** in  $\text{CDCl}_3$

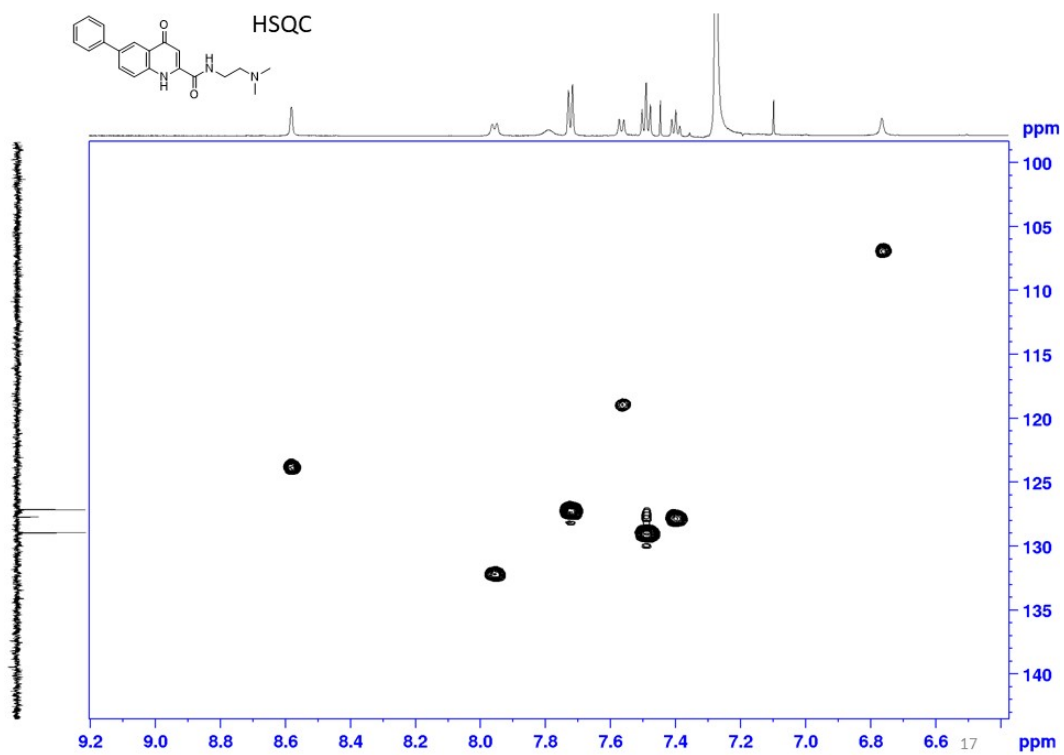

Figure S17. HSQC NMR spectrum of **12b** in  $\text{CDCl}_3$

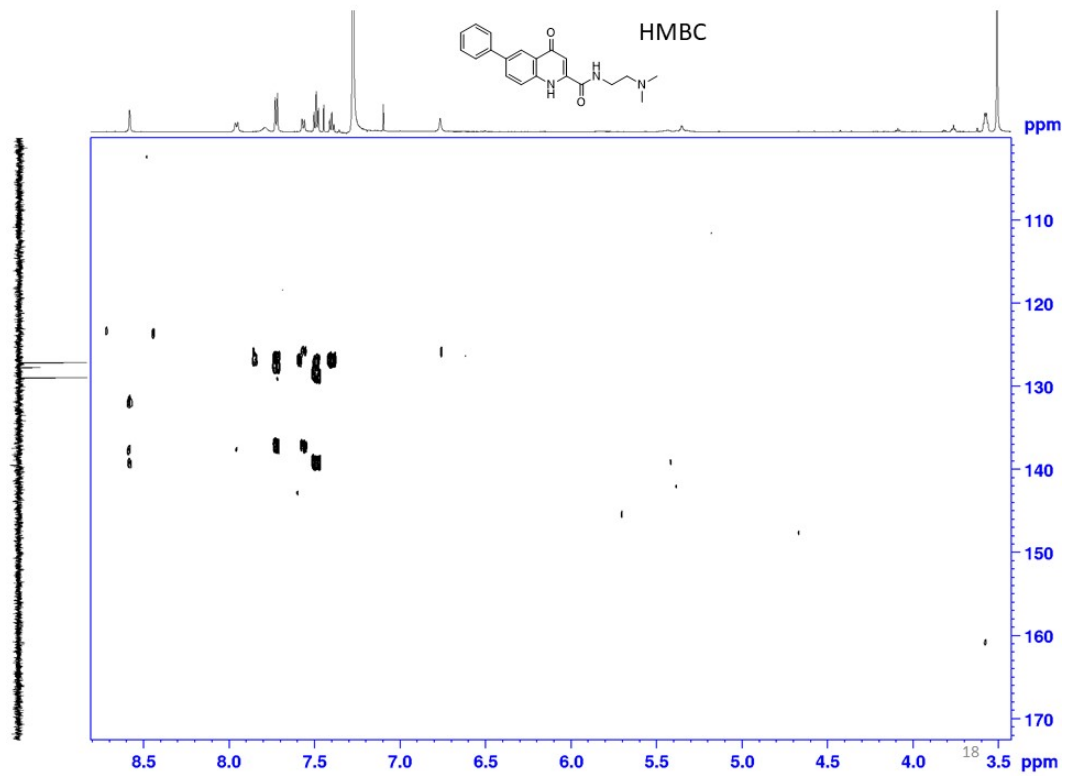

Figure S18. HMBC NMR spectrum of **12b** in CDCl<sub>3</sub>

7-Chloro-N-(2-(dimethylamino)ethyl)-4-oxo-1,4-dihydroquinoline-2-carboxamide (**12c**):

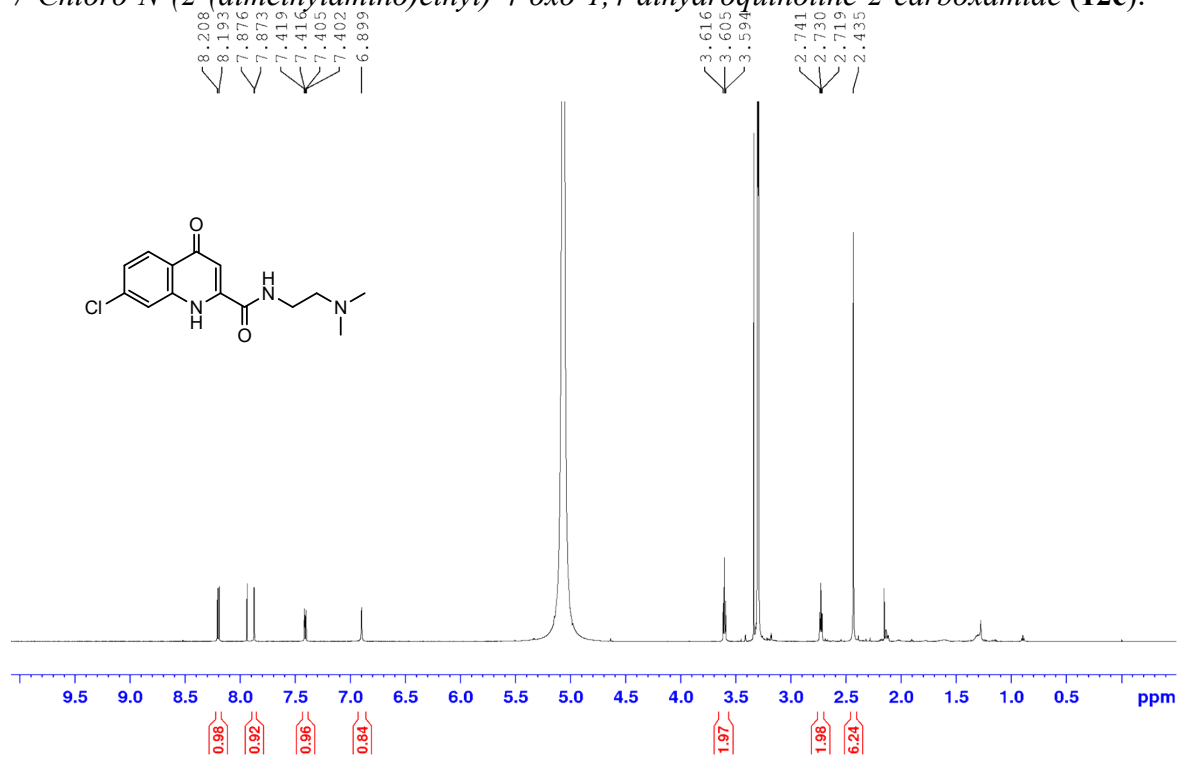

Figure

e S19. <sup>1</sup>H-NMR spectrum of **12c**

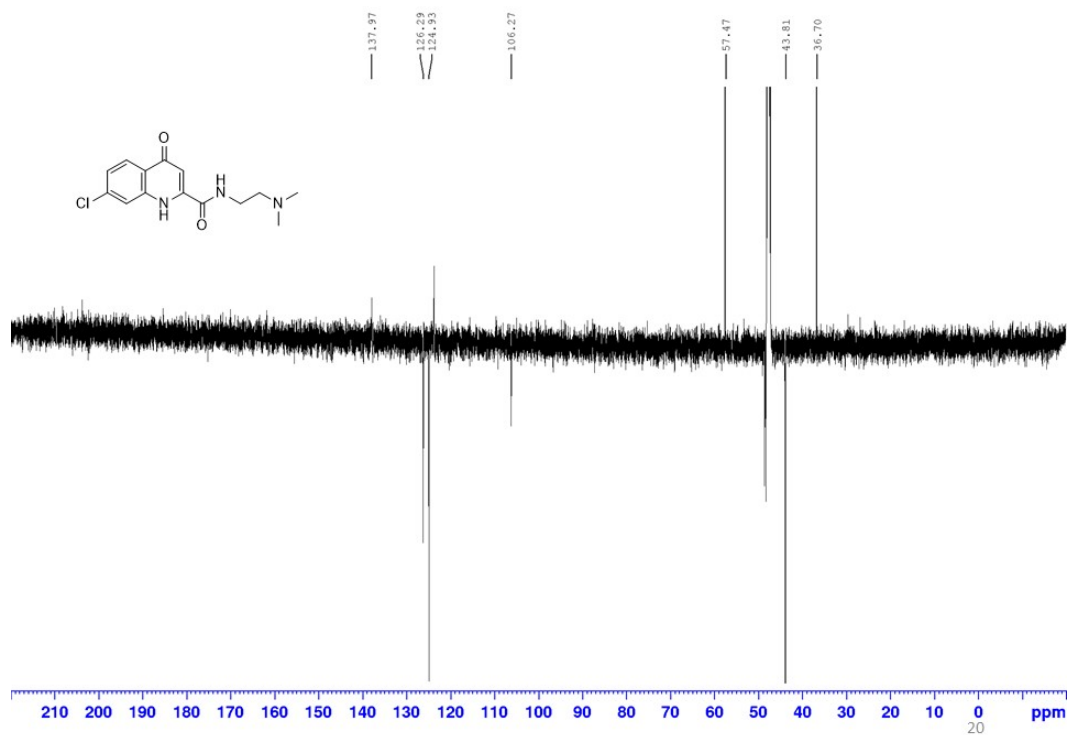

Figure S20. <sup>13</sup>C-NMR spectrum of **12c**

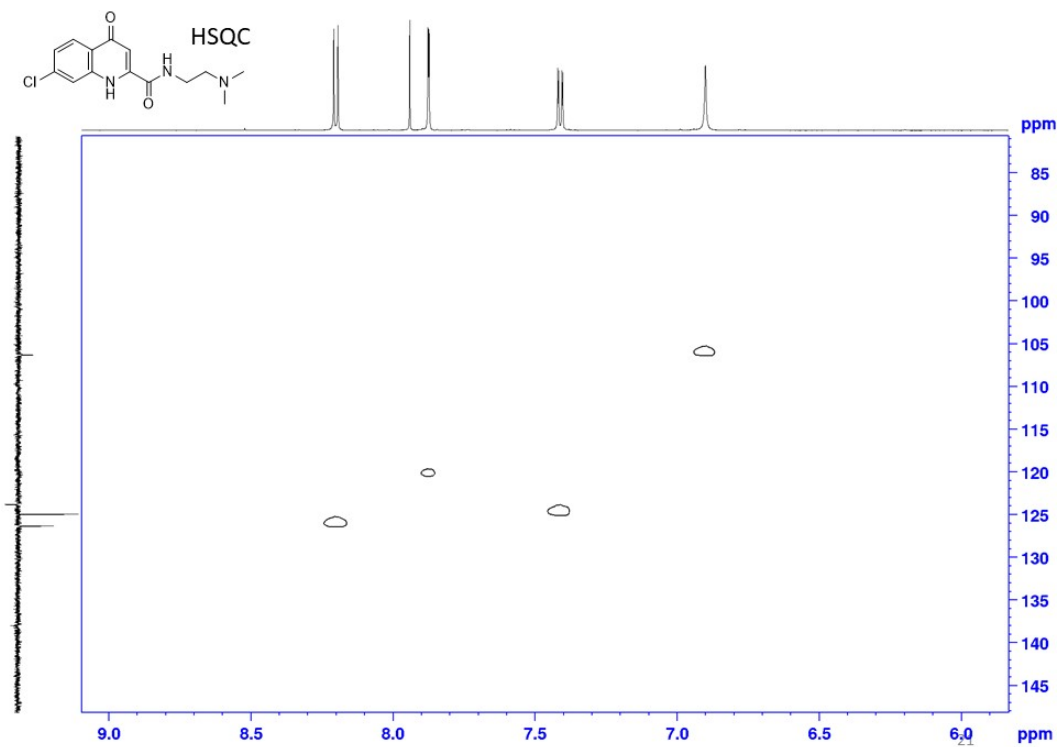

Figure S21. HSQC NMR spectrum of **12c**

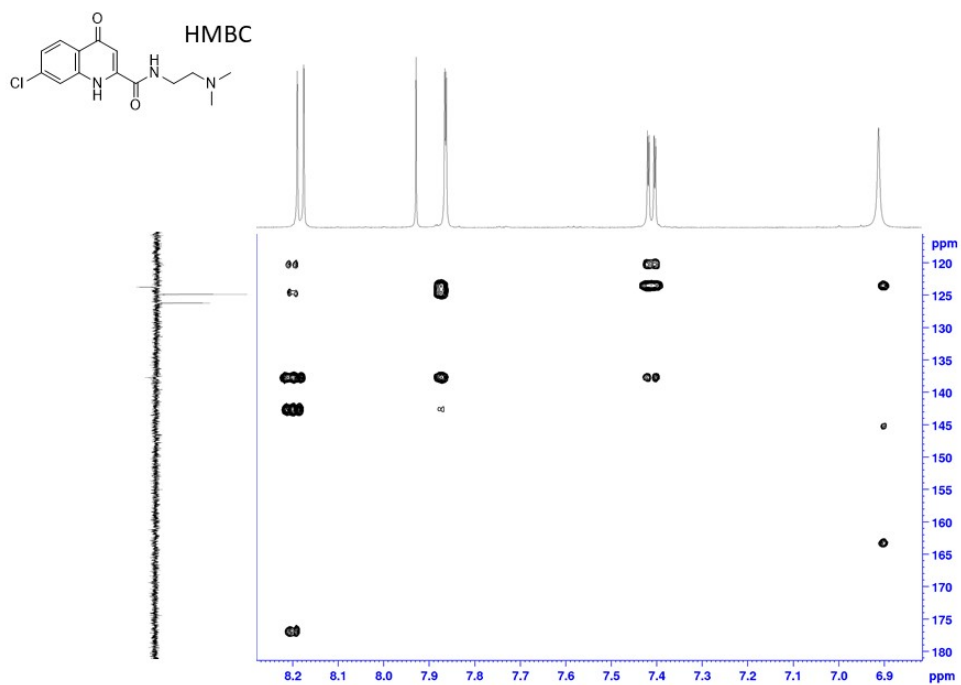

22

Figure S22. HMBC NMR spectrum of **12c**

*N*-(2-(dimethylamino)ethyl)-8-methyl-4-oxo-1,4-dihydroquinoline-2-carboxamide (**12d**):

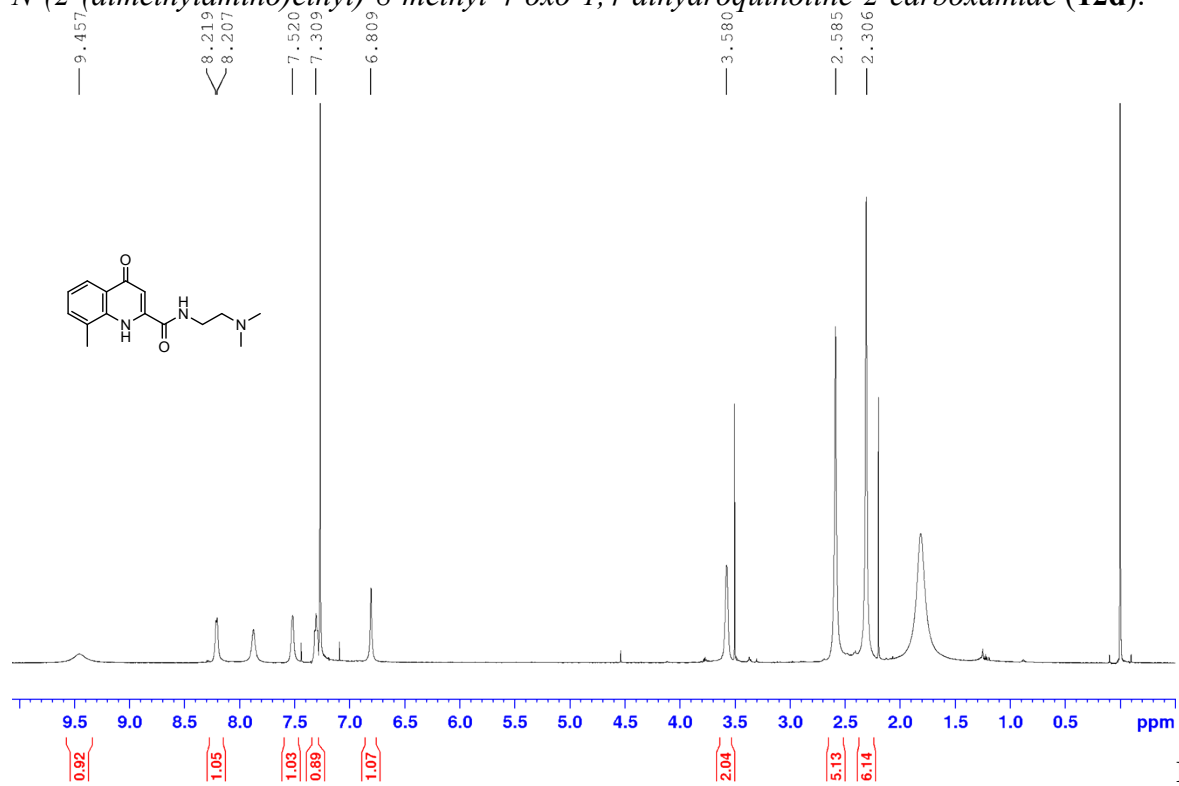

Figur

e S23. <sup>1</sup>H-NMR spectrum of **12d**

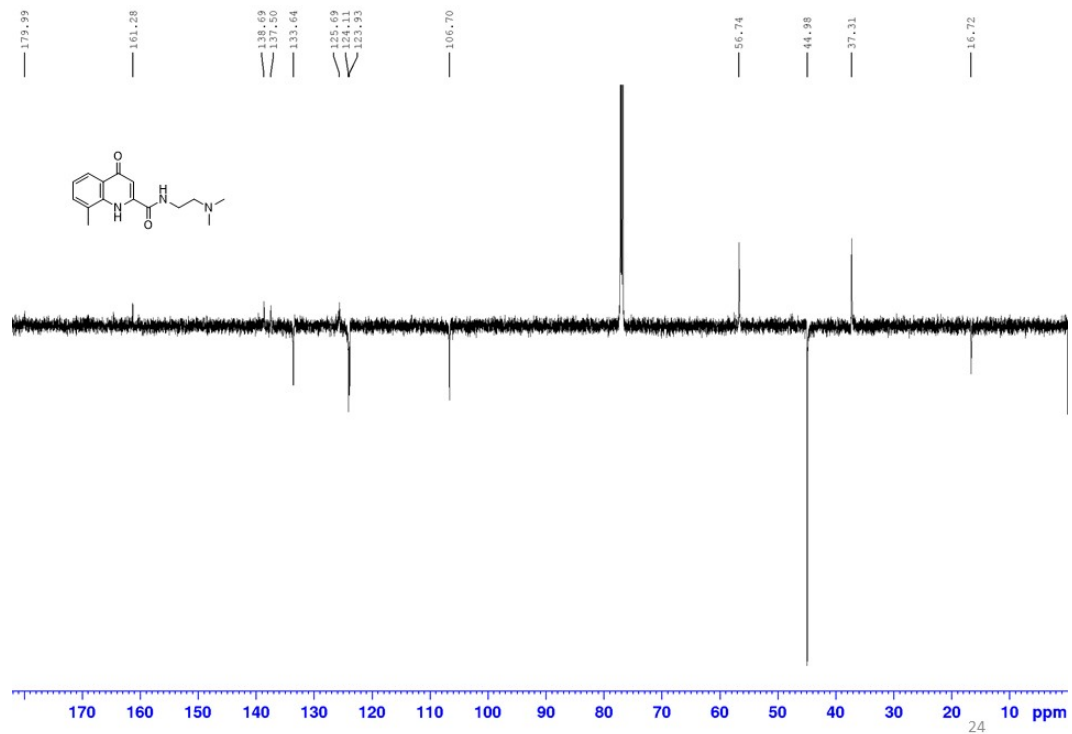

Figure S24. <sup>13</sup>C-NMR spectrum of **12d**

3-(Morpholinomethyl)-4-oxo-N-phenyl-1,4-dihydroquinoline-2-carboxamide (**8a**):

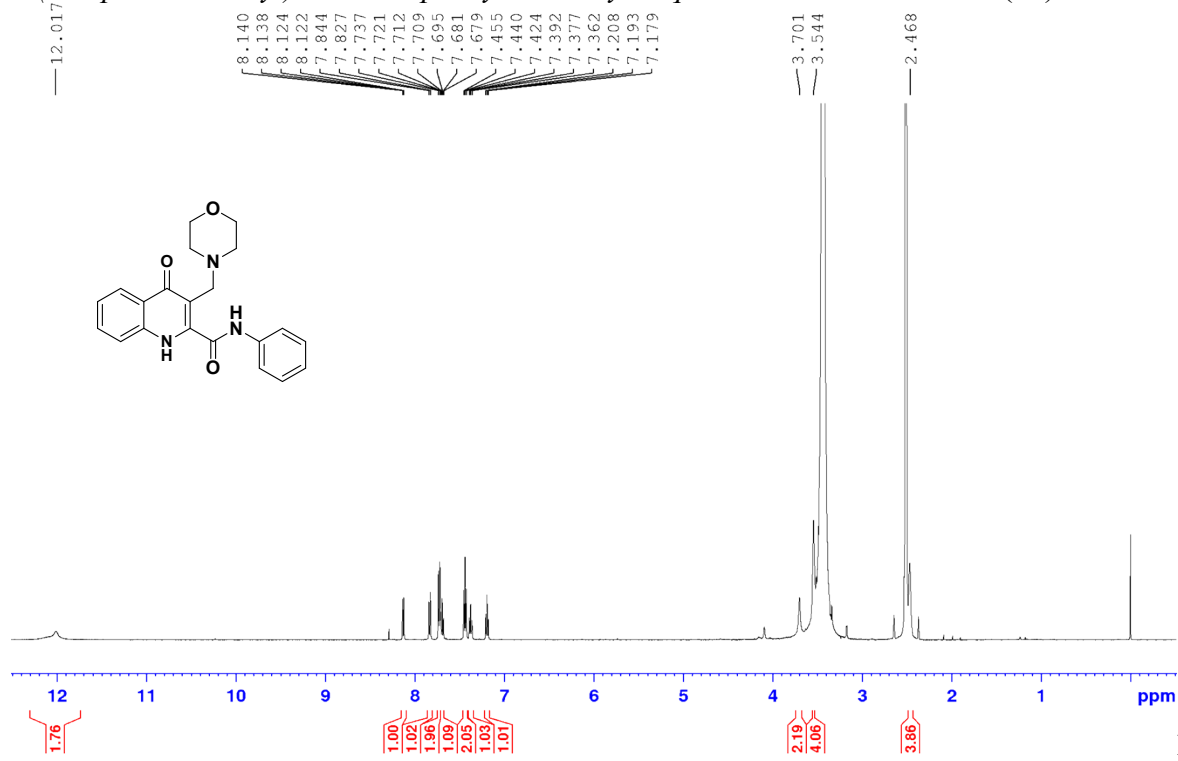

Figure

S25. <sup>1</sup>H-NMR spectrum of **8a**

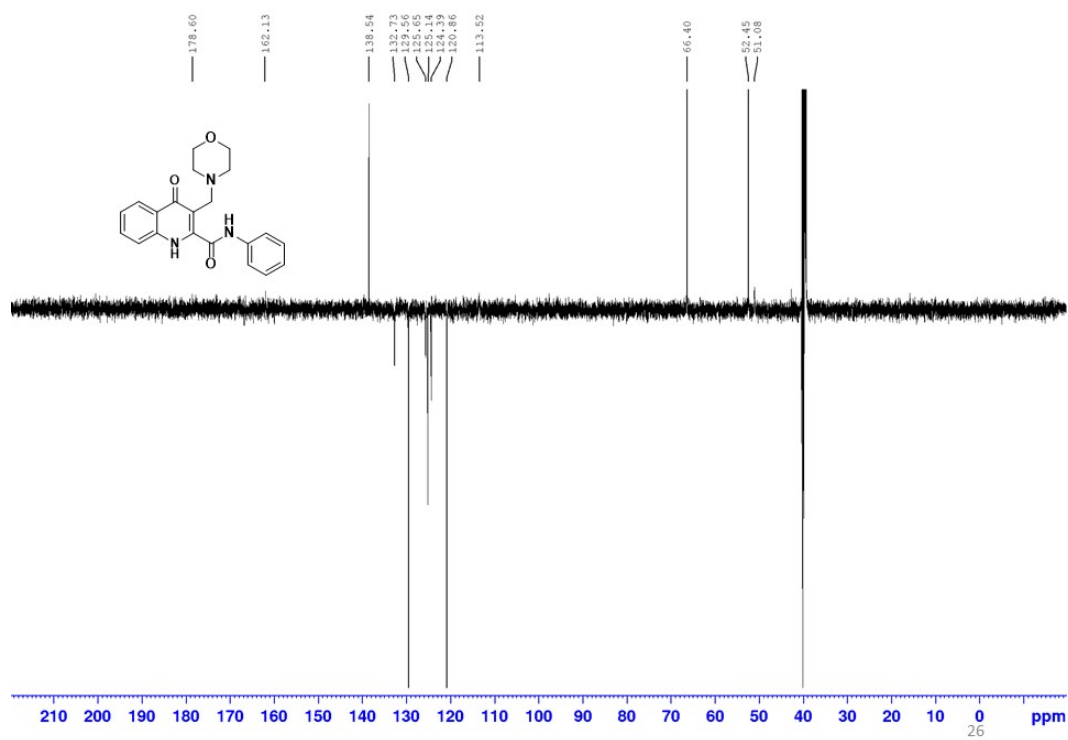

Figure S26. <sup>13</sup>C-NMR spectrum of **8a**

*N*-benzyl-3-(morpholinomethyl)-4-oxo-1,4-dihydroquinoline-2-carboxamide (**8b**):

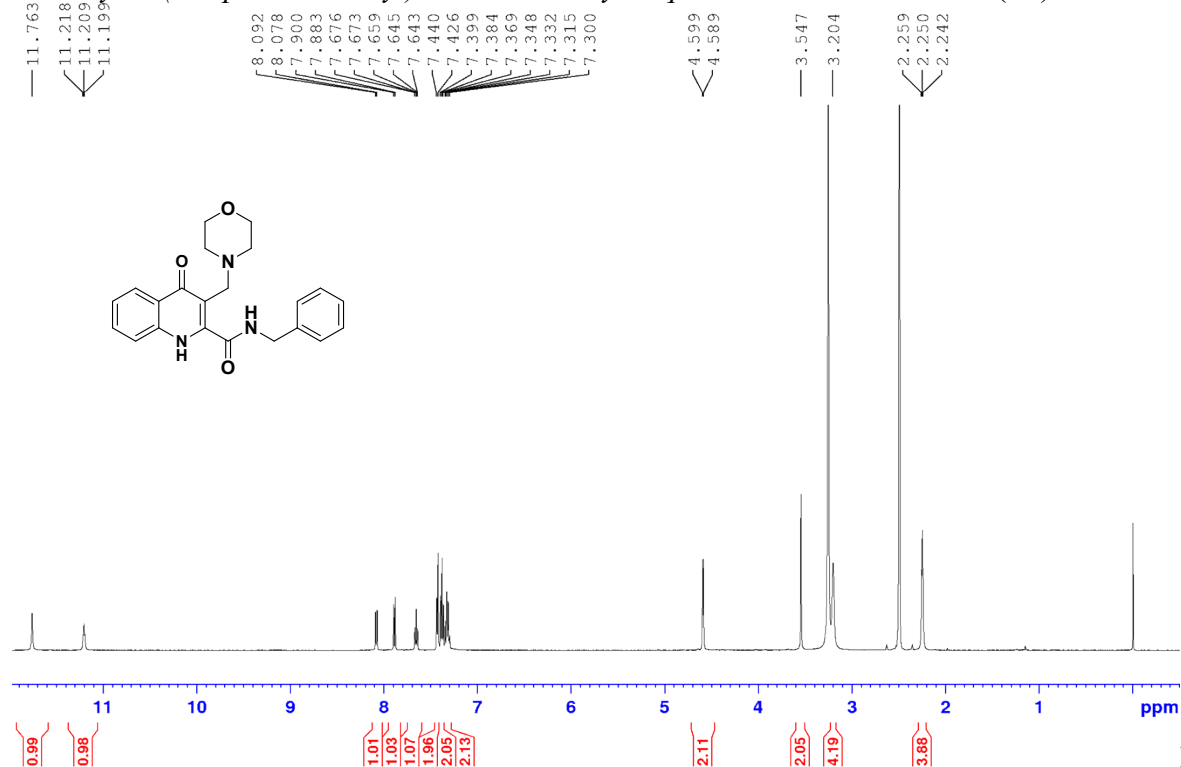

e S27. <sup>1</sup>H-NMR spectrum of **8b**

Figur

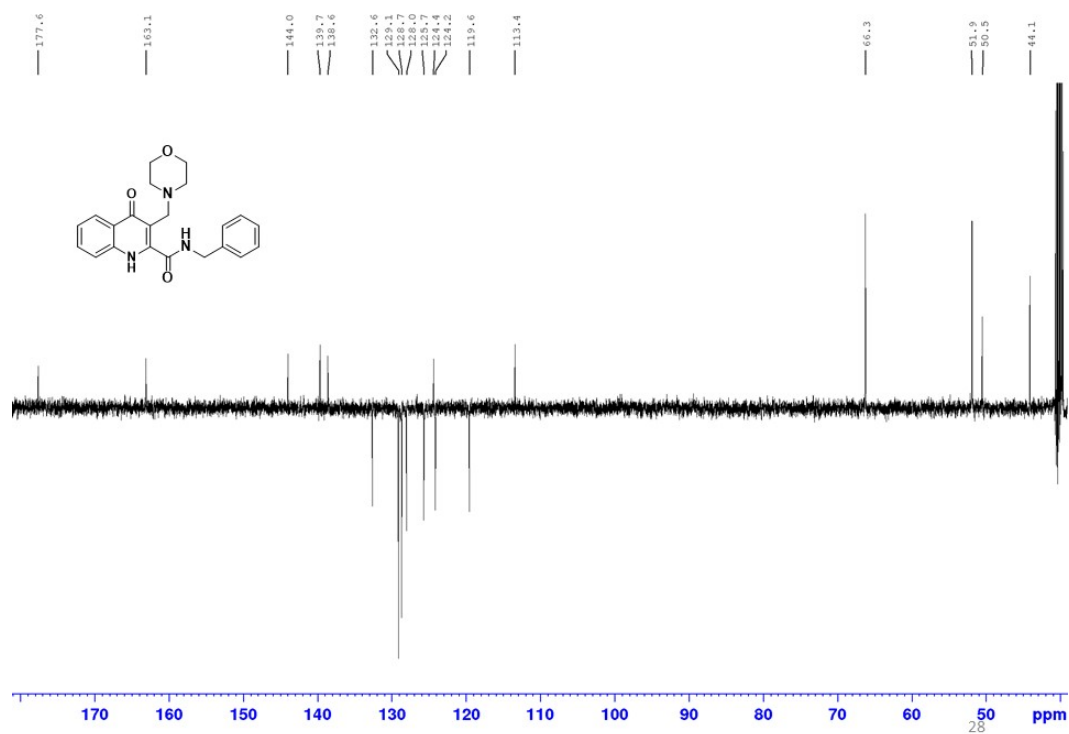

Figure S28. <sup>13</sup>C-NMR spectrum of **8b**



3-(Morpholinomethyl)-4-oxo-N-phenethyl-1,4-dihydroquinoline-2-carboxamide (**8c**):

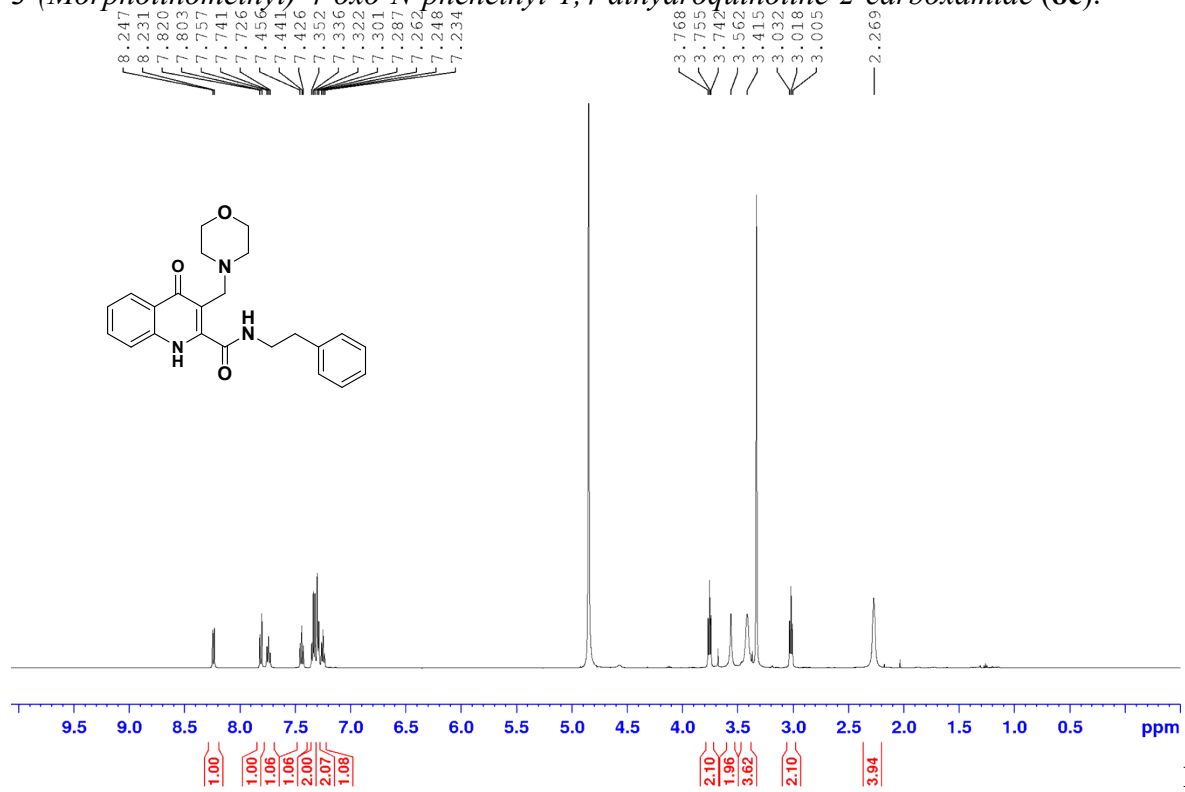

e S29. <sup>1</sup>H-NMR spectrum of **8c**

Figur

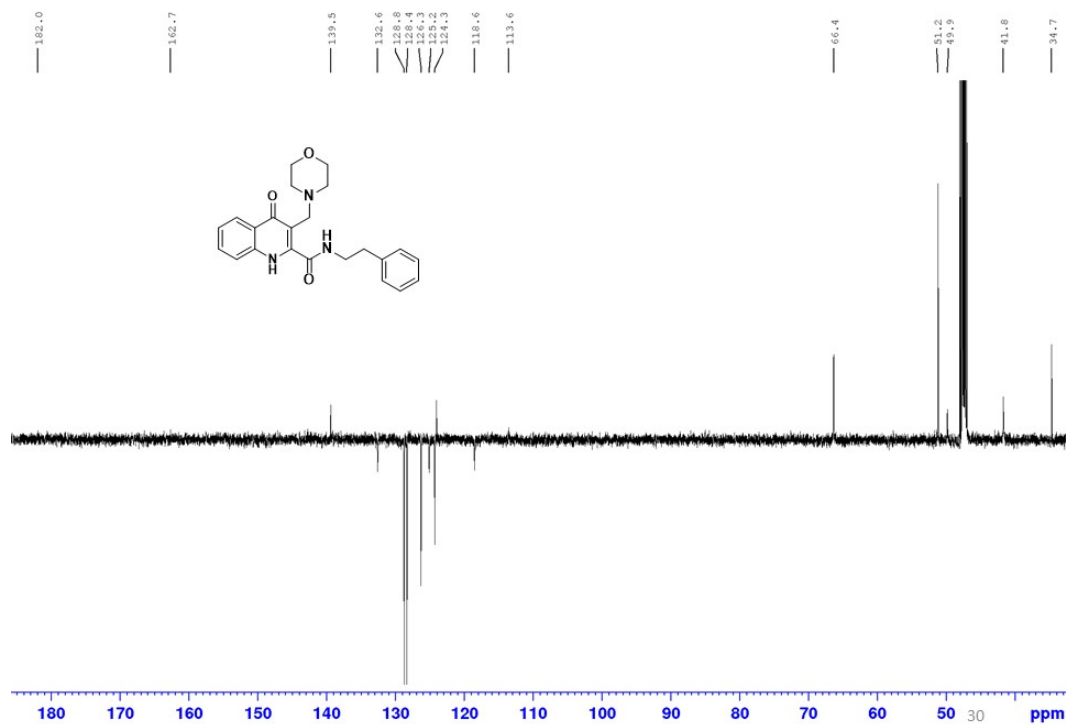

Figure S30.  $^{13}\text{C}$ -NMR spectrum of **8c**

*3-(Morpholinomethyl)-4-oxo-N-propyl-1,4-dihydroquinoline-2-carboxamide (8d):*

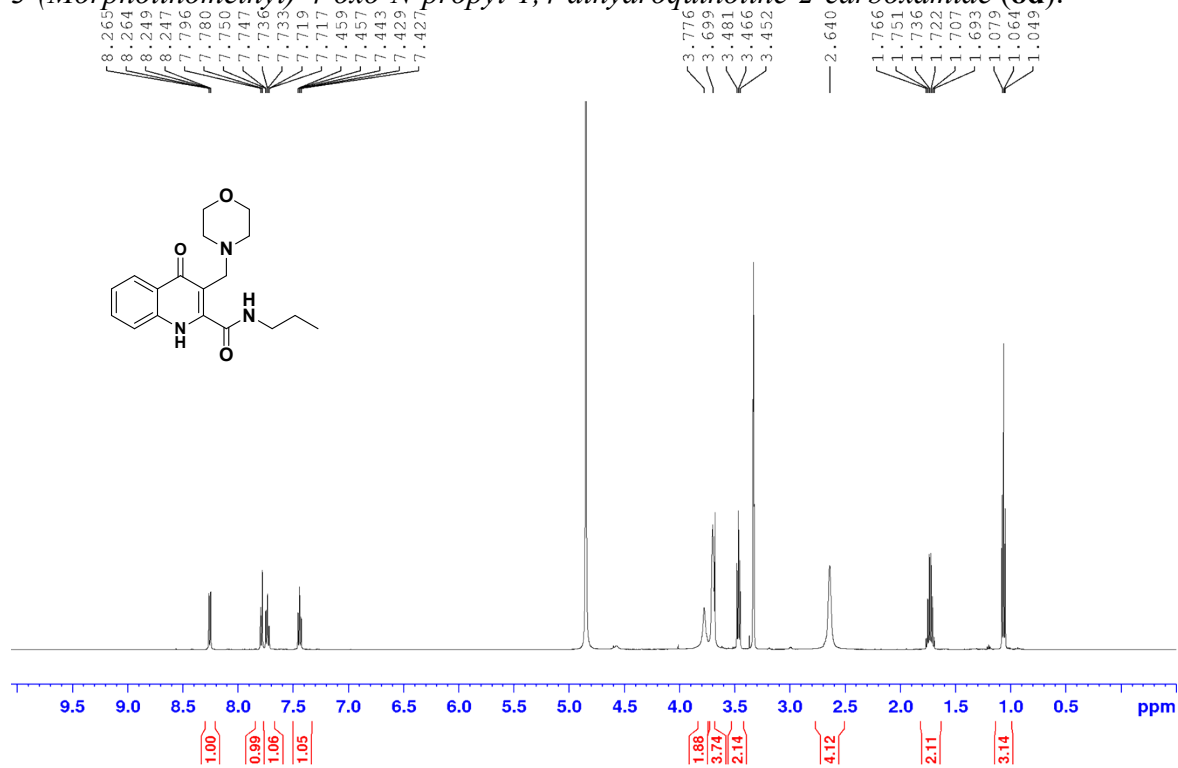

Figur

e S31.  $^1\text{H}$ -NMR spectrum of **8d**

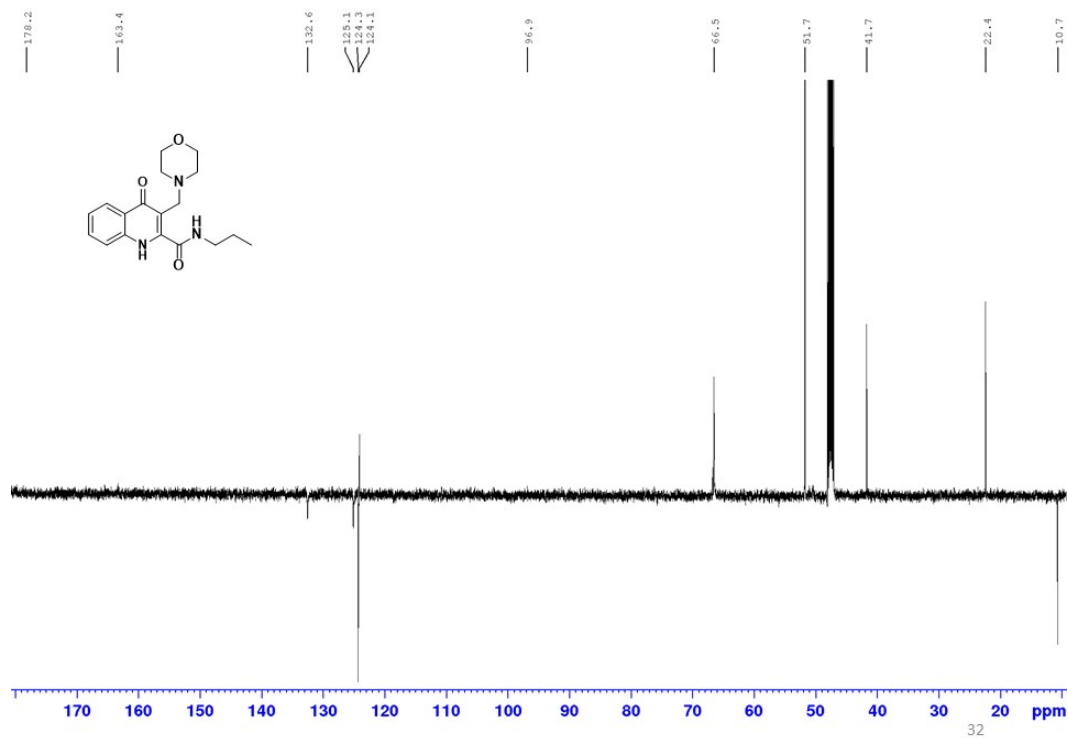

Figure S32.  $^{13}\text{C}$ -NMR spectrum of **8d**

*N*-(3-(dimethylamino)propyl)-3-(morpholinomethyl)-4-oxo-1,4-dihydroquinoline-2-carboxamide (**8e**):

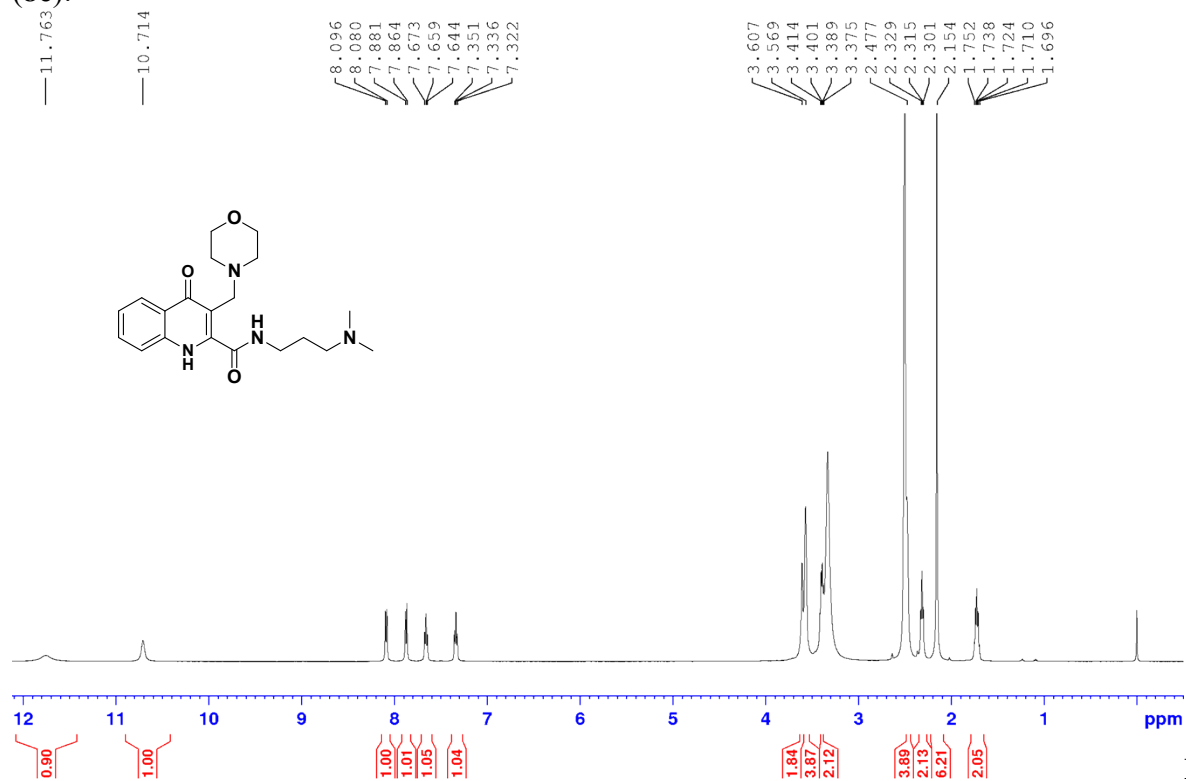

Figur

e S33.  $^1\text{H}$ -NMR spectrum of **8e**

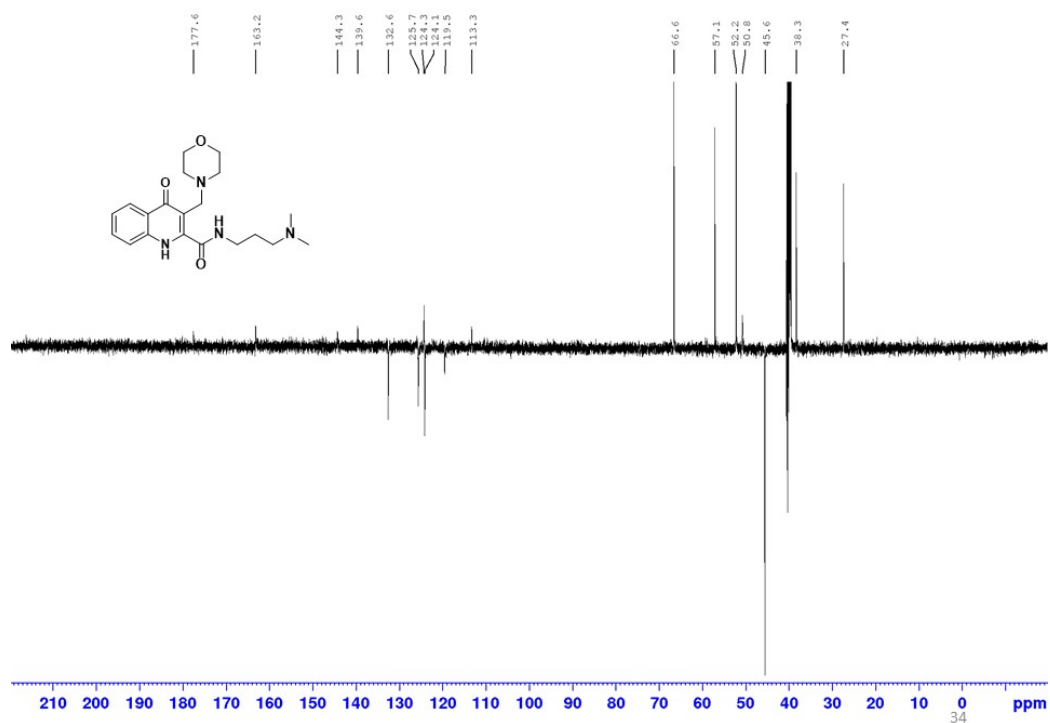

Figure S34. <sup>13</sup>C-NMR spectrum of **8e**  
 5-Chloro-N-(2-(dimethylamino)ethyl)-3-(morpholinomethyl)-4-oxo-1,4-dihydroquinoline-2-carboxamide (**13a**):

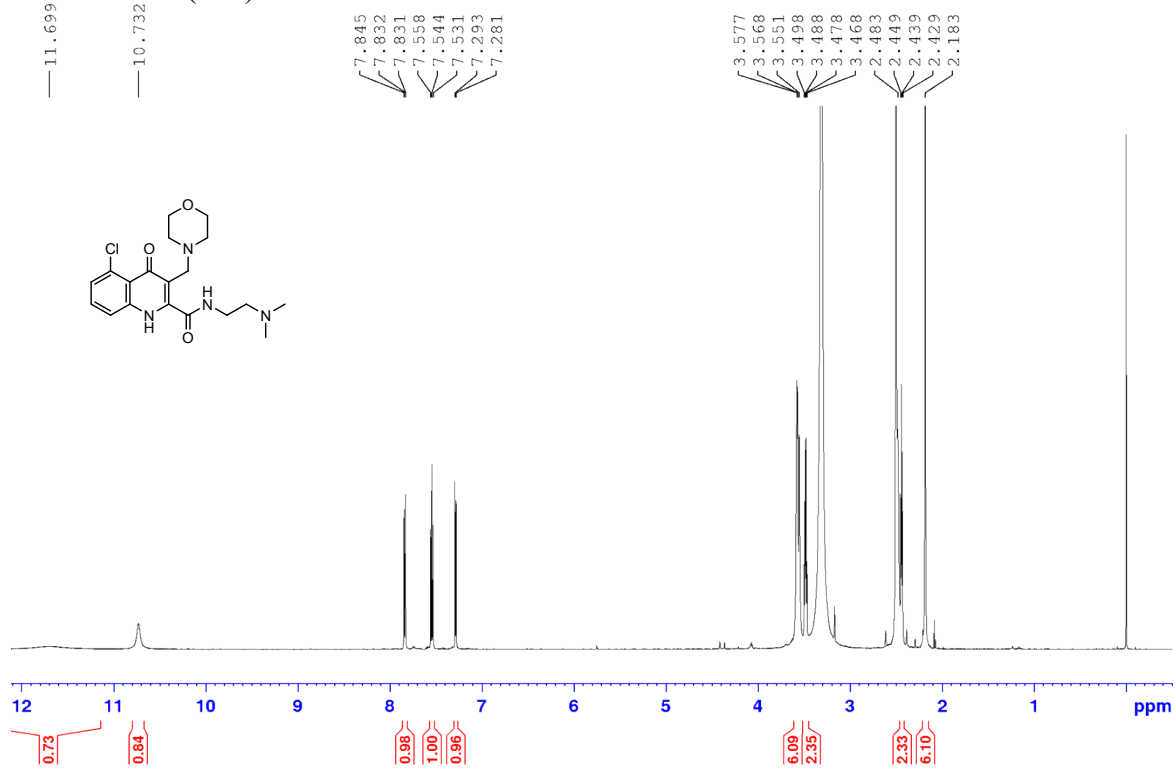

e S35. <sup>1</sup>H-NMR spectrum of **13a**

Figur

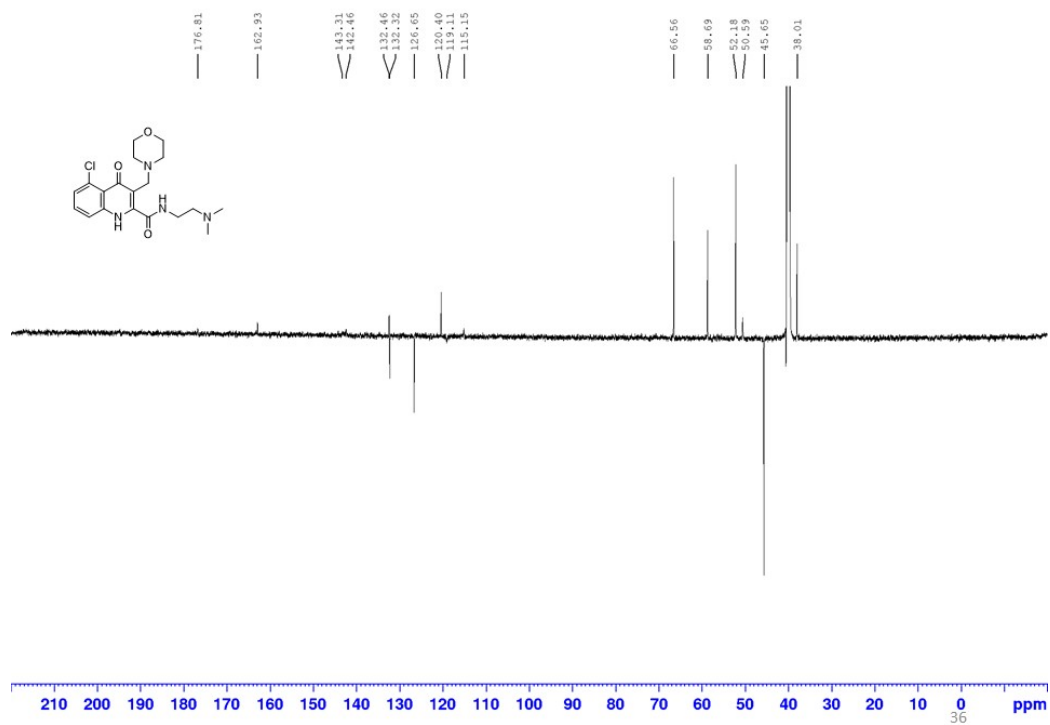

Figure S36.  $^{13}\text{C}$ -NMR spectrum of **13a**

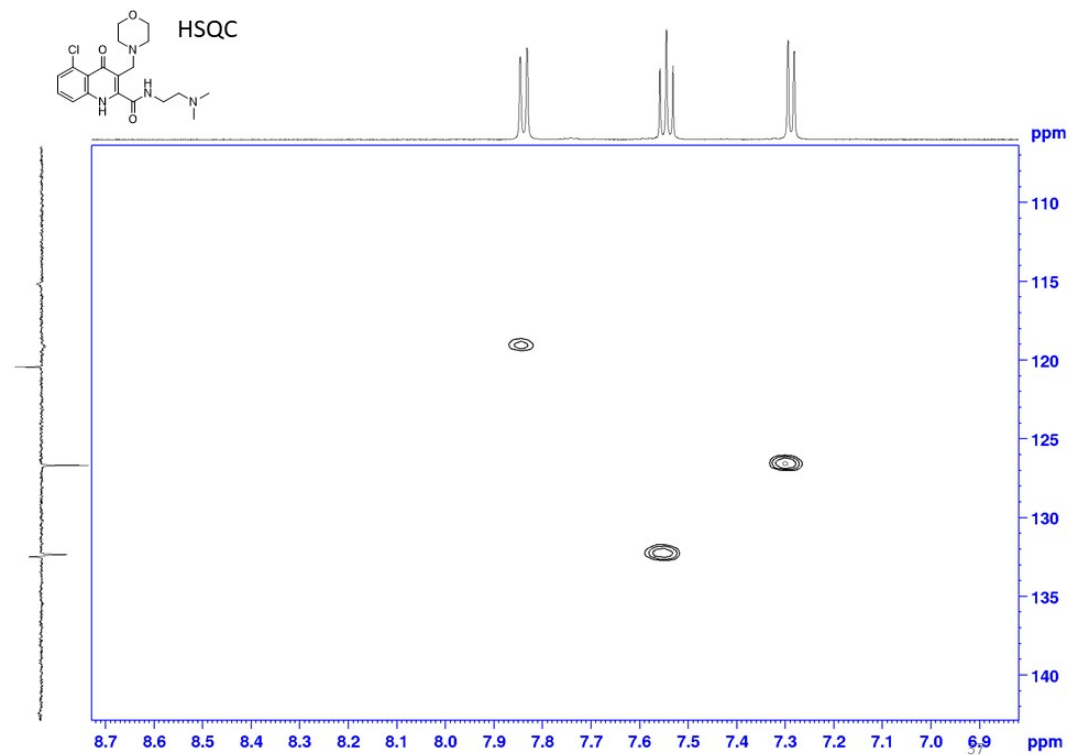

Figure S37. HSQC NMR spectrum of **13a**

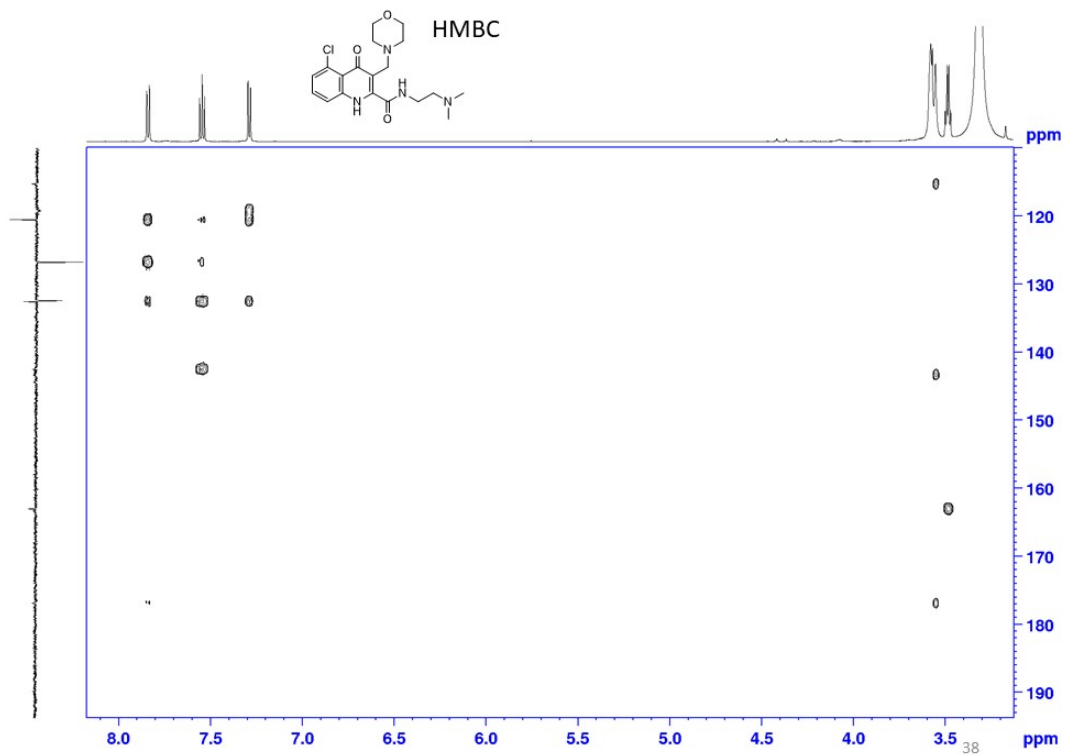

Figure S38. HMBC NMR spectrum of **13a**  
*N*-(2-(dimethylamino)ethyl)-3-(morpholinomethyl)-4-oxo-6-phenyl-1,4-dihydroquinoline-2-carboxamide (**13b**):

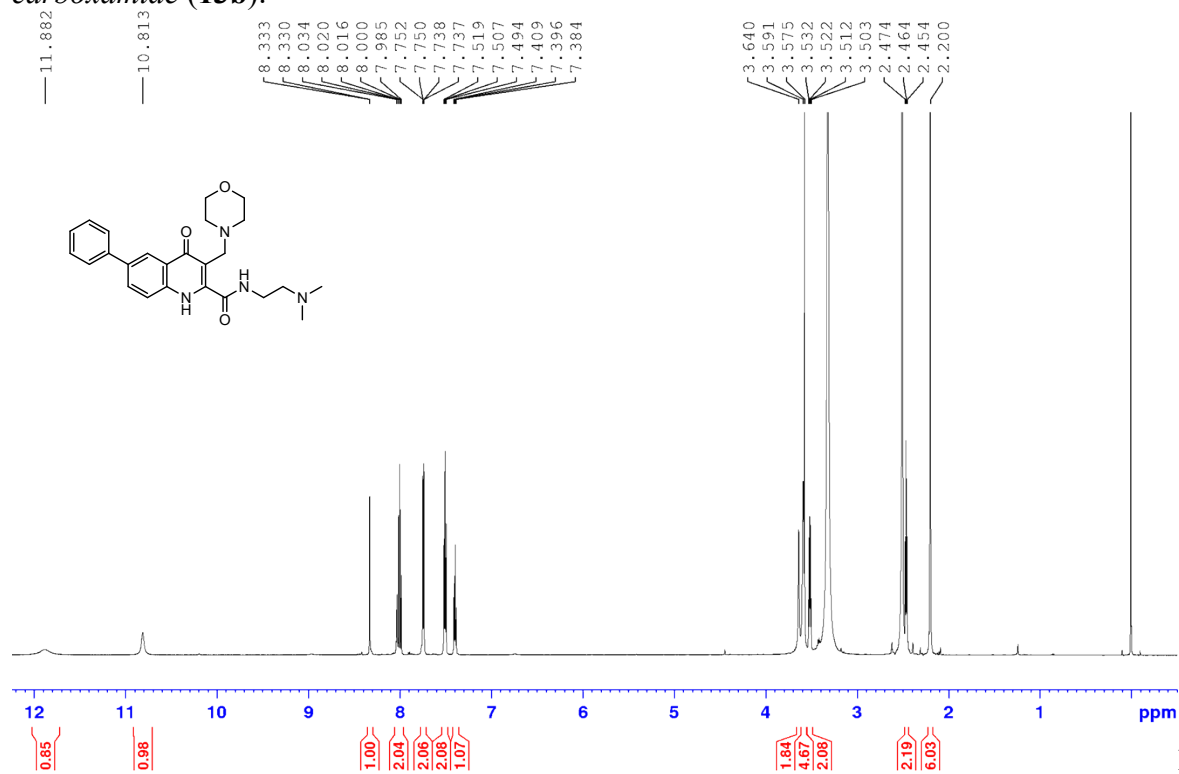

Figure S39. <sup>1</sup>H-NMR spectrum of **13b**

Figure

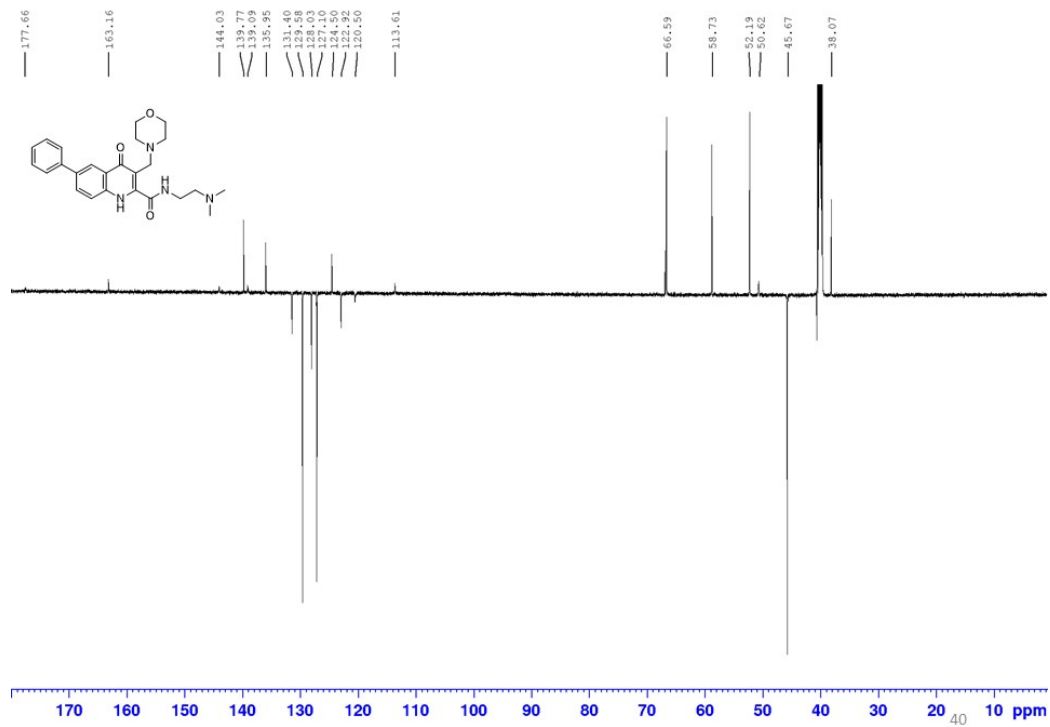

Figure S40. <sup>13</sup>C-NMR spectrum of **13b**

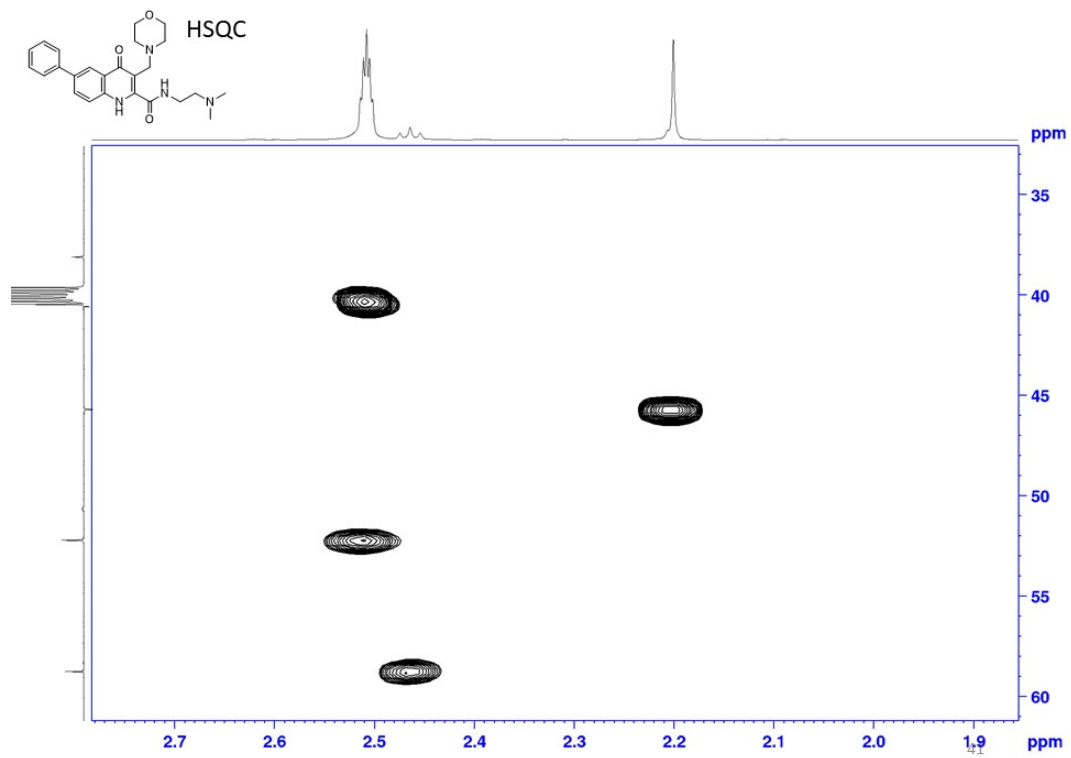

Figure S41. HSQC NMR spectrum of **13a**

7-Chloro-N-(2-(dimethylamino)ethyl)-3-(morpholinomethyl)-4-oxo-1,4-dihydroquinoline-2-carboxamide (**13c**):

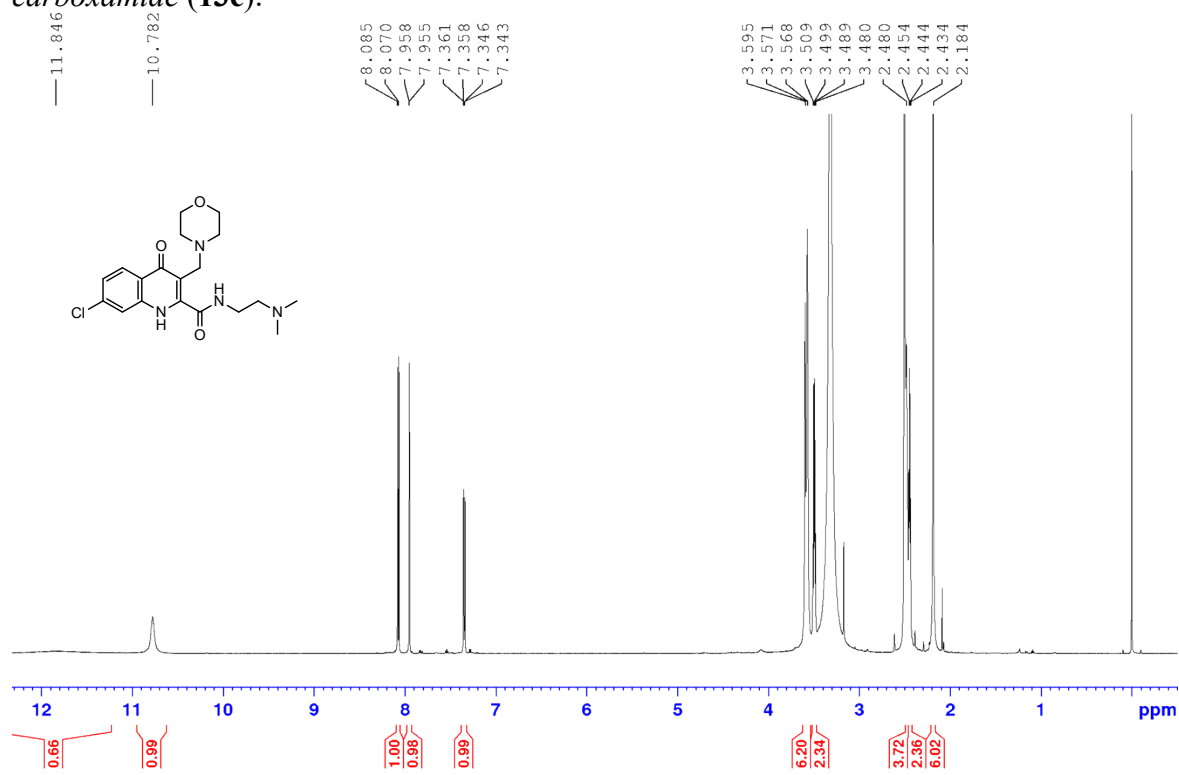

Figure S42. <sup>1</sup>H-NMR spectrum of **13c**

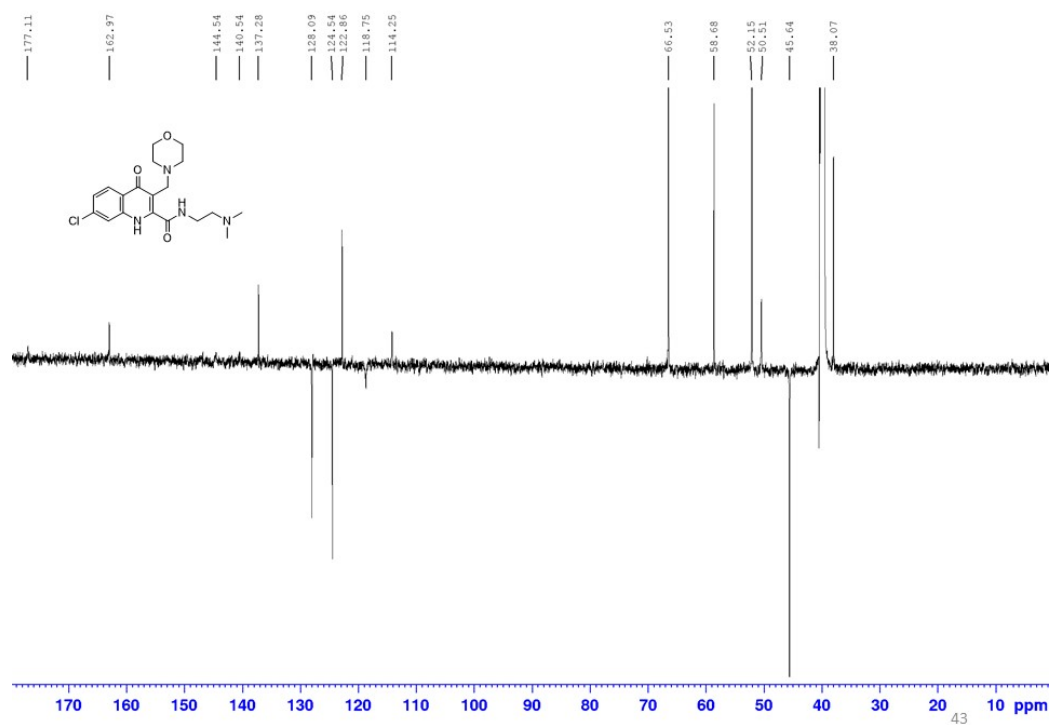

Figure S43. <sup>13</sup>C-NMR spectrum of **13c**



*N*-(2-(dimethylamino)ethyl)-8-methyl-3-(morpholinomethyl)-4-oxo-1,4-dihydroquinoline-2-carboxamide (**13d**):

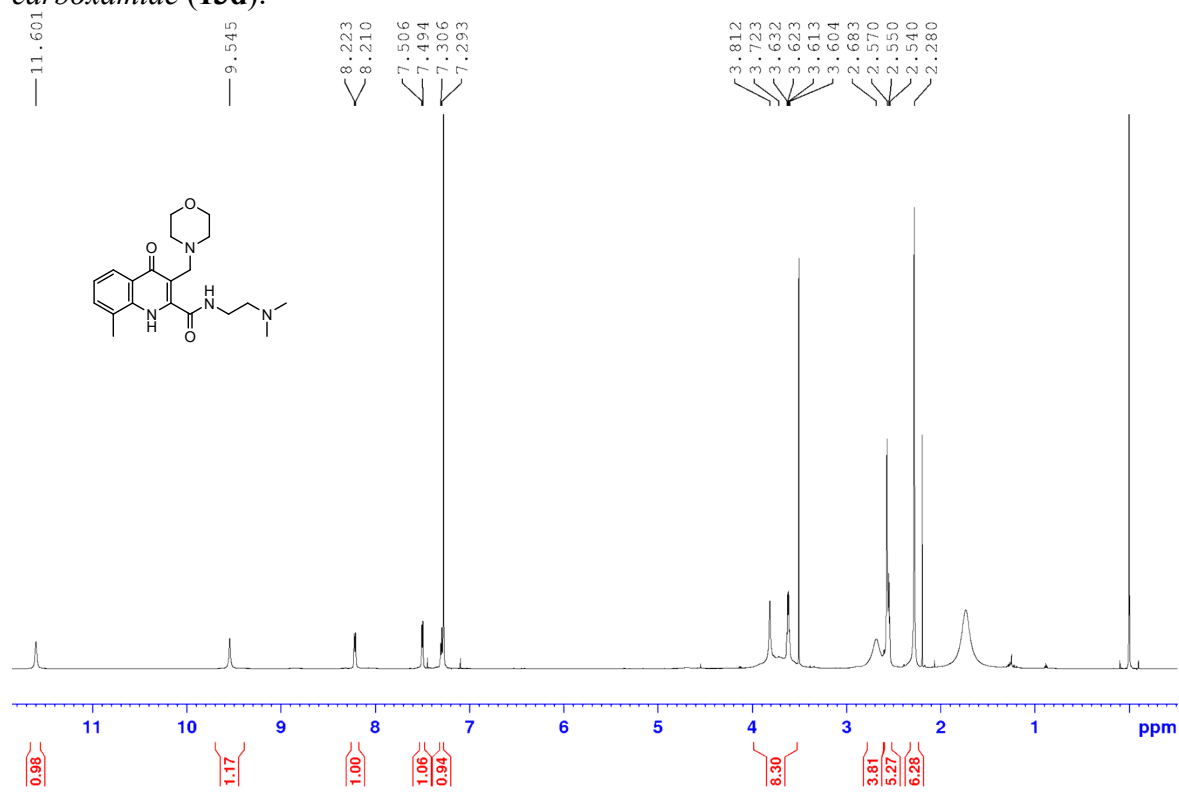

Figure S44. <sup>1</sup>H-NMR spectrum of **13d**

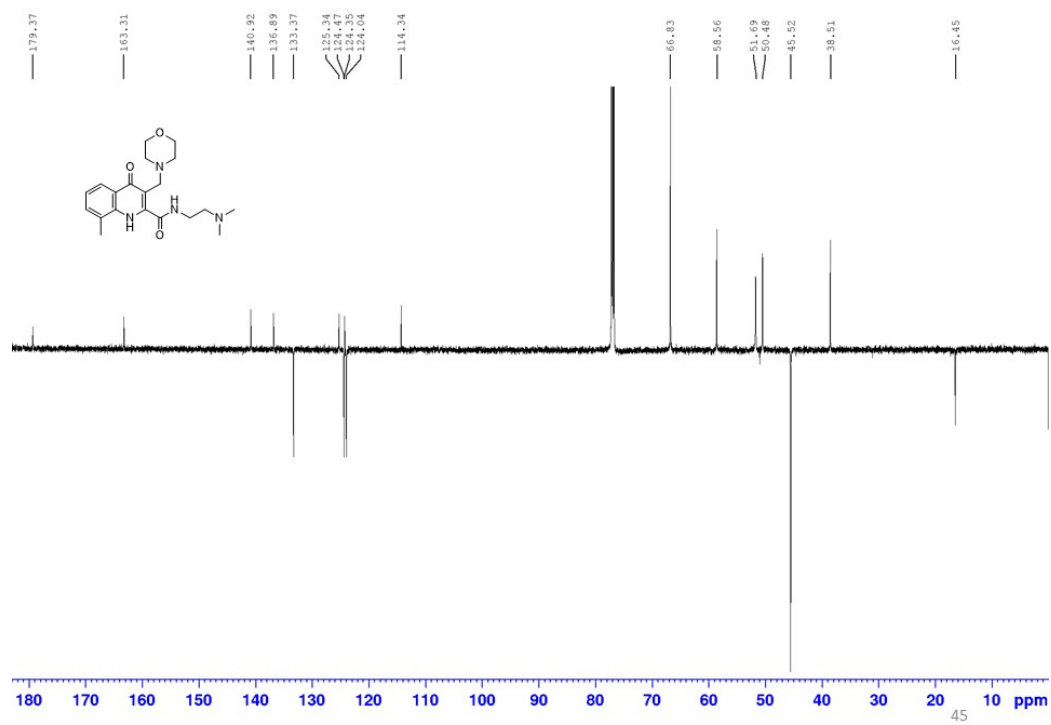

Figure S45. <sup>13</sup>C-NMR spectrum of **13d**

2-(2-(Dimethylamino)ethyl)-1H-pyrrolo[3,4-b]quinoline-3,9(2H,4H)-dione (**4**):

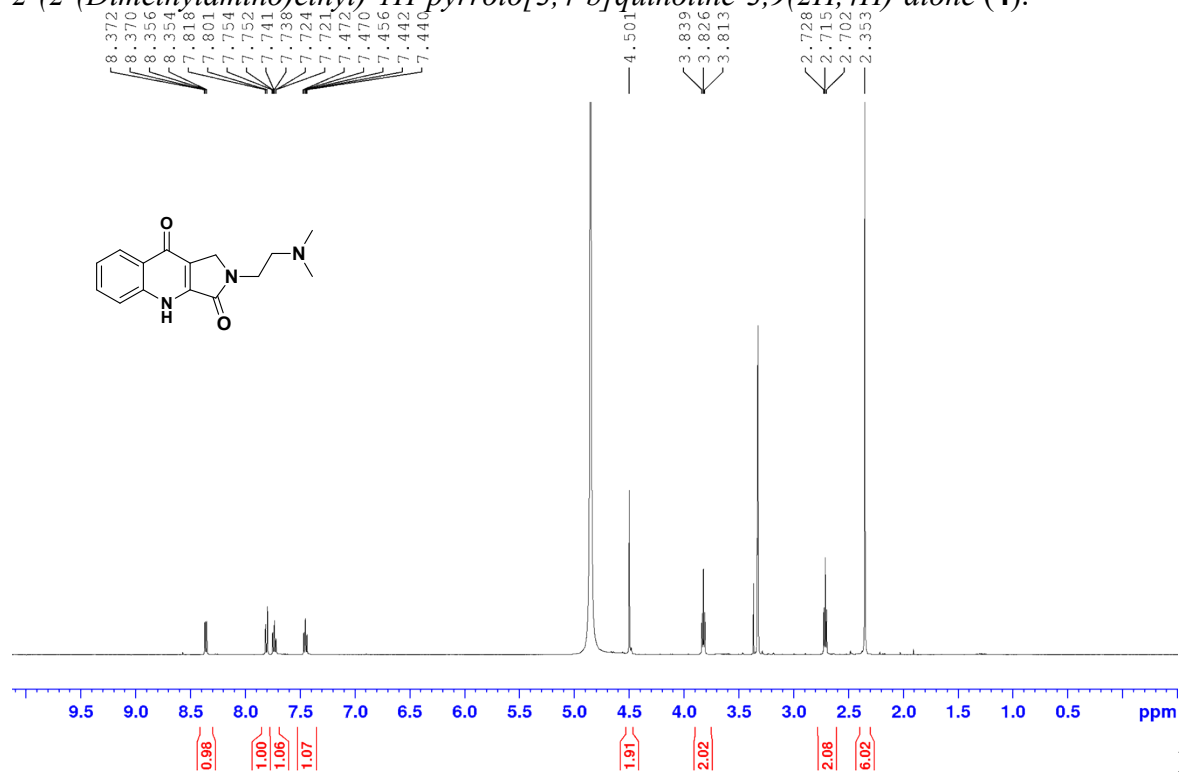

Figure

e S46. <sup>1</sup>H-NMR spectrum of **4**

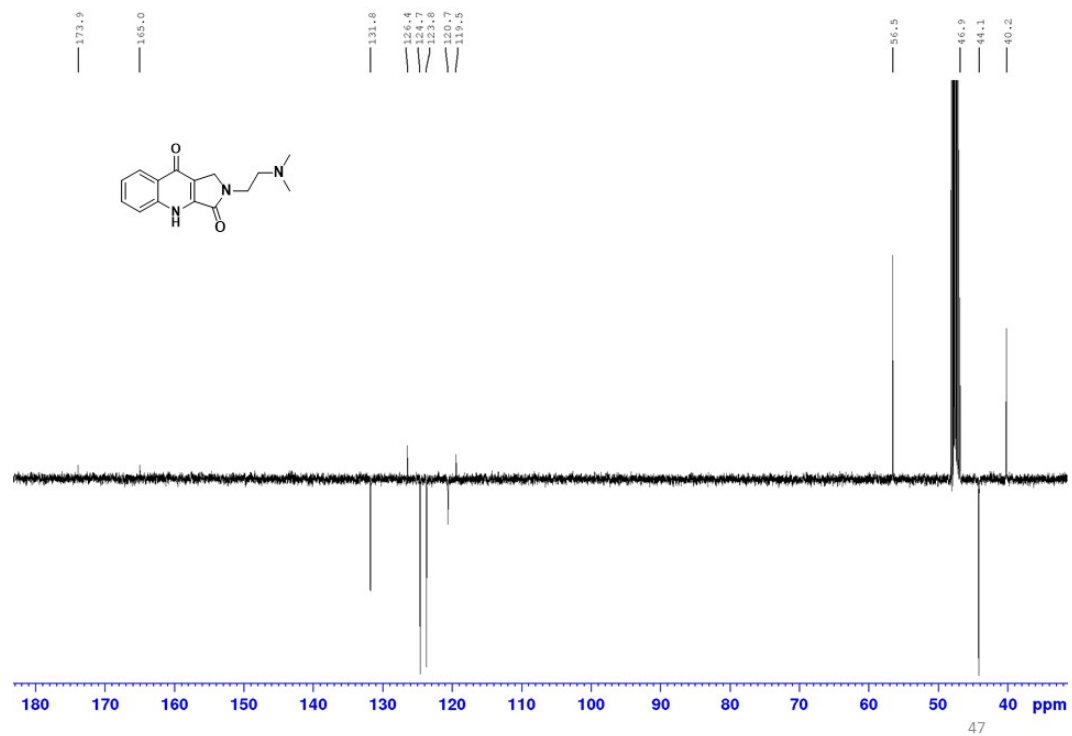

Figure S47. <sup>13</sup>C-NMR spectrum of **4**

2-(3-(Dimethylamino)propyl)-1H-pyrrolo[3,4-b]quinoline-3,9(2H,4H)-dione (**9e**):

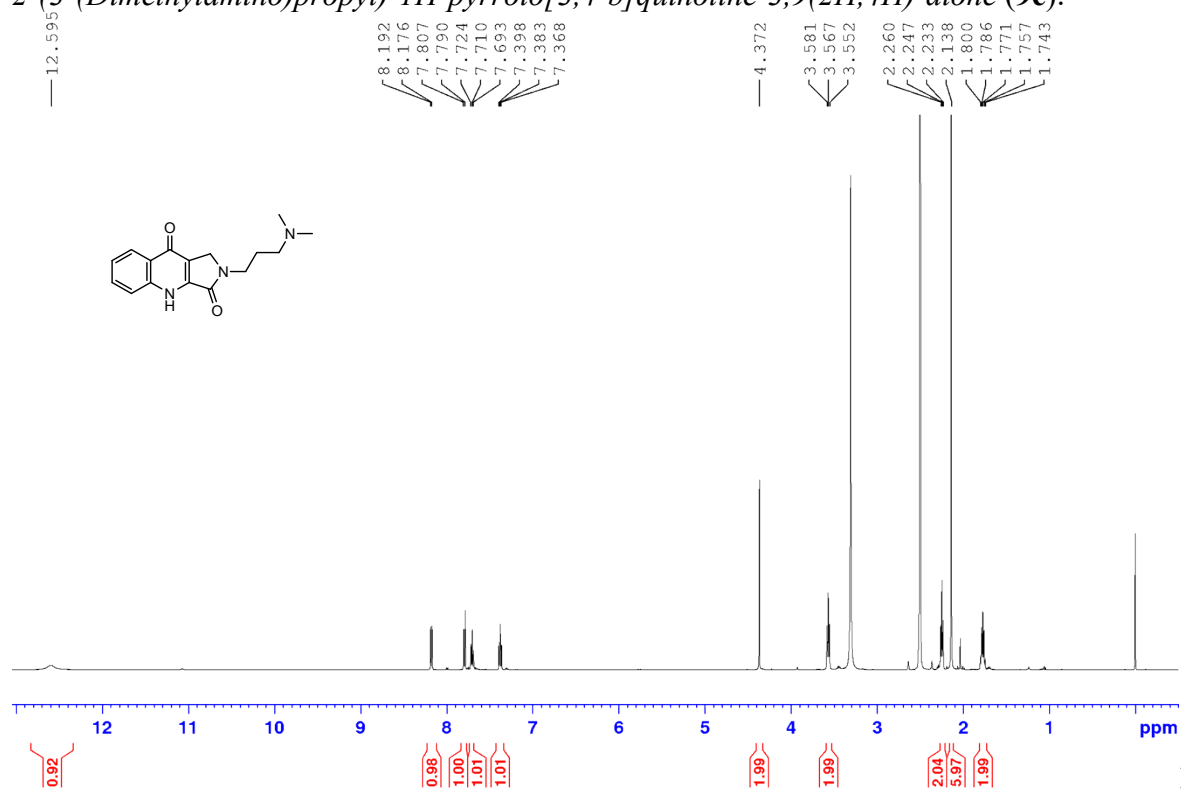

Figure

e S48. <sup>1</sup>H-NMR spectrum of **9e**

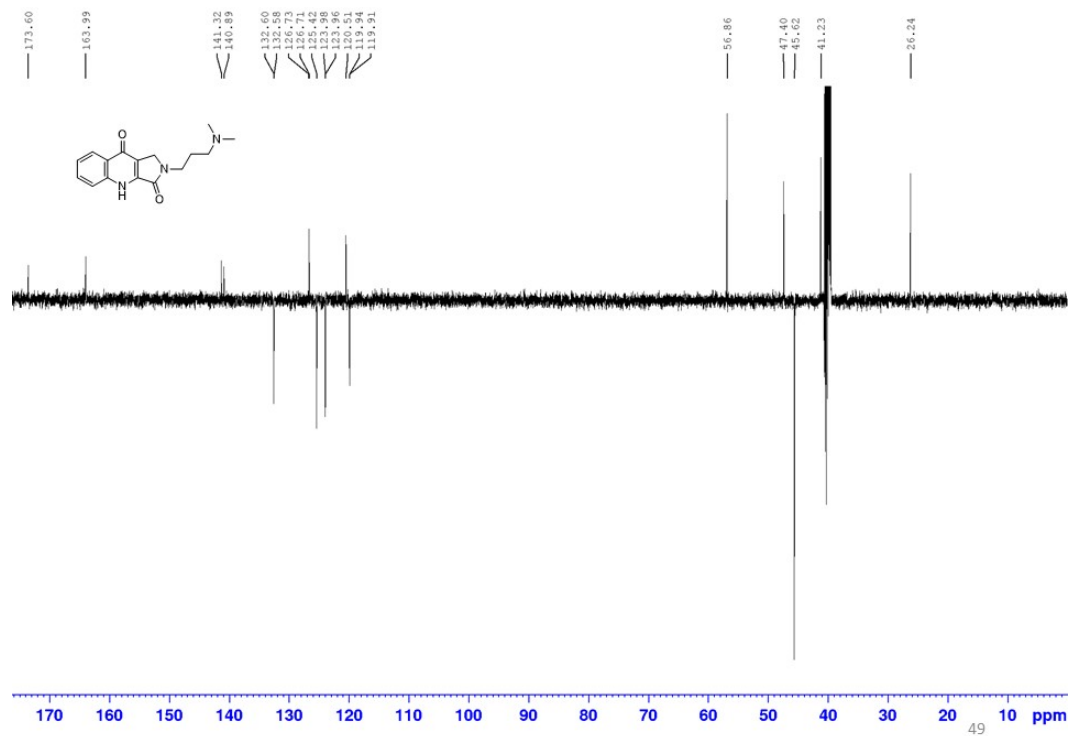

Figure S49. <sup>13</sup>C-NMR spectrum of **9e**

2-(2-(Pyrrolidin-1-yl)ethyl)-1H-pyrrolo[3,4-b]quinoline-3,9(2H,4H)-dione (**9f**):

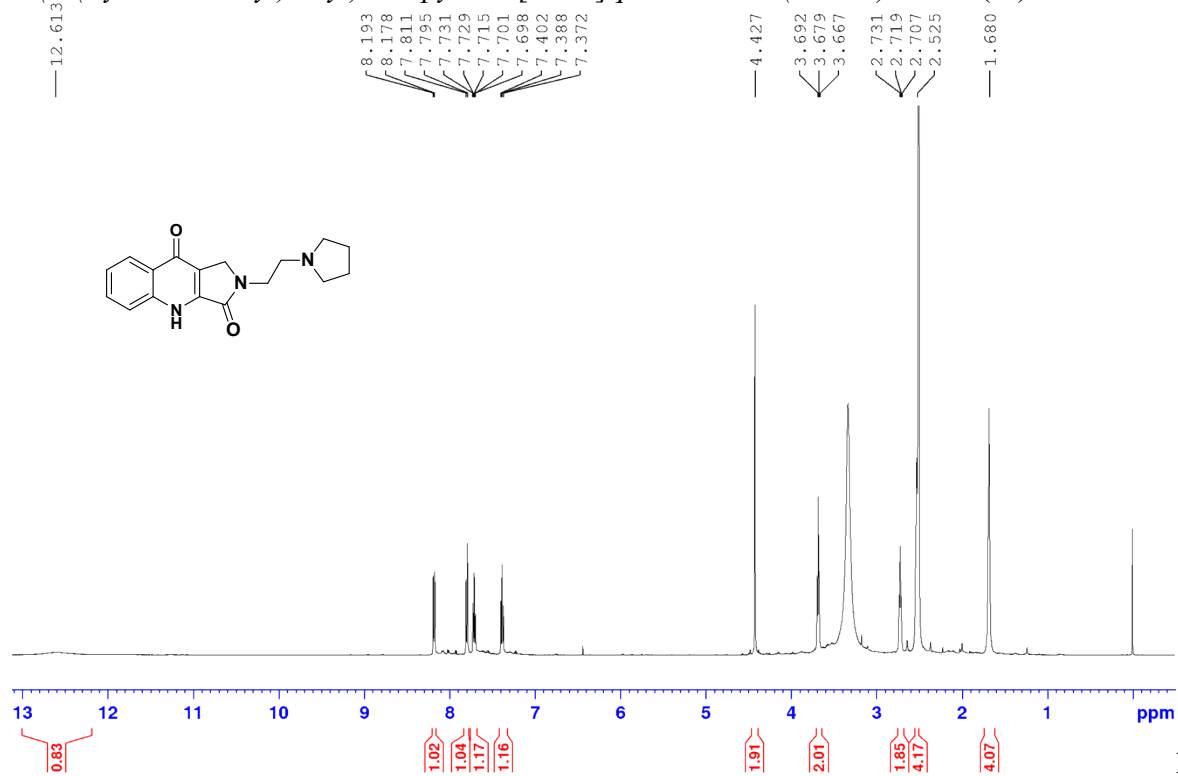

Figur

e S50. <sup>1</sup>H-NMR spectrum of **9f**

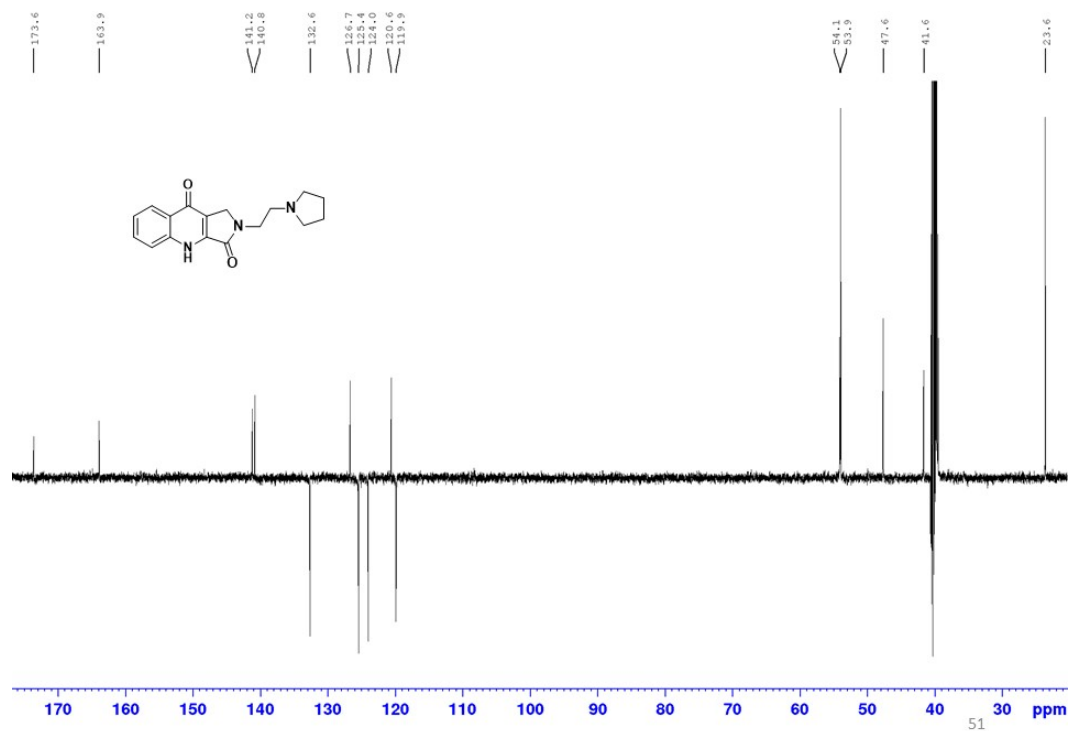

Figure S51.  $^{13}\text{C}$ -NMR spectrum of **9f**

*8-Chloro-2-(2-(dimethylamino)ethyl)-1H-pyrrolo[3,4-b]quinoline-3,9(2H,4H)-dione (14a):*

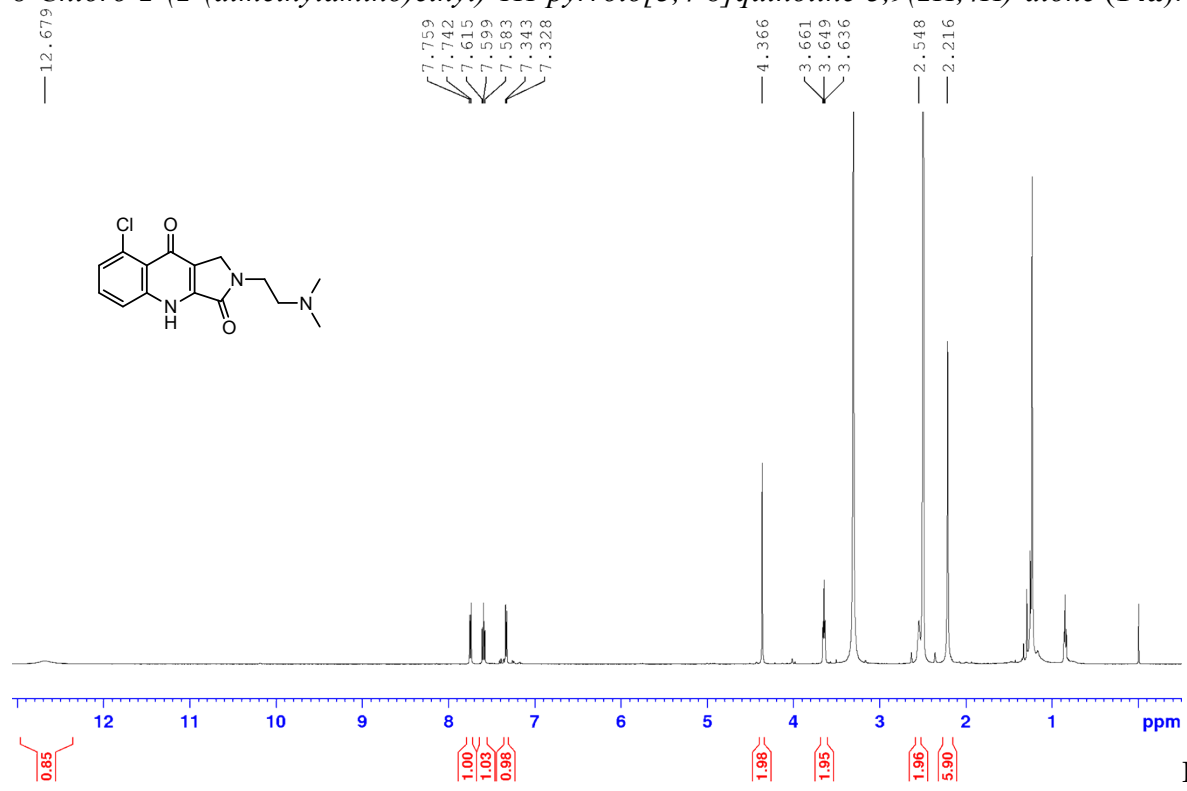

Figure S52.  $^1\text{H}$ -NMR spectrum of **14a**

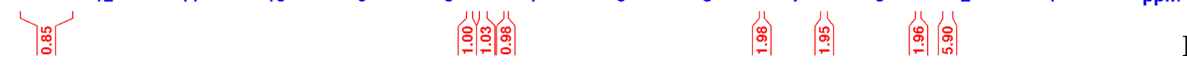

Figur

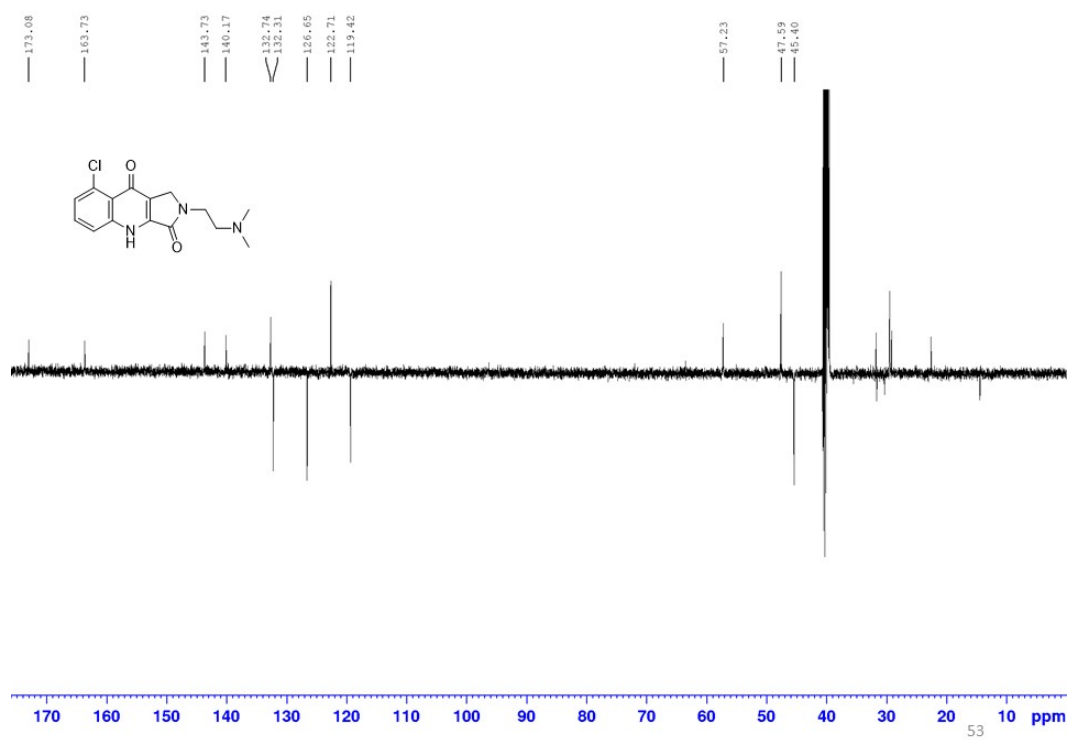

Figure S53. <sup>13</sup>C-NMR spectrum of **14a**

6-Chloro-2-(2-(dimethylamino)ethyl)-1H-pyrrolo[3,4-b]quinoline-3,9(2H,4H)-dione (**14c**):

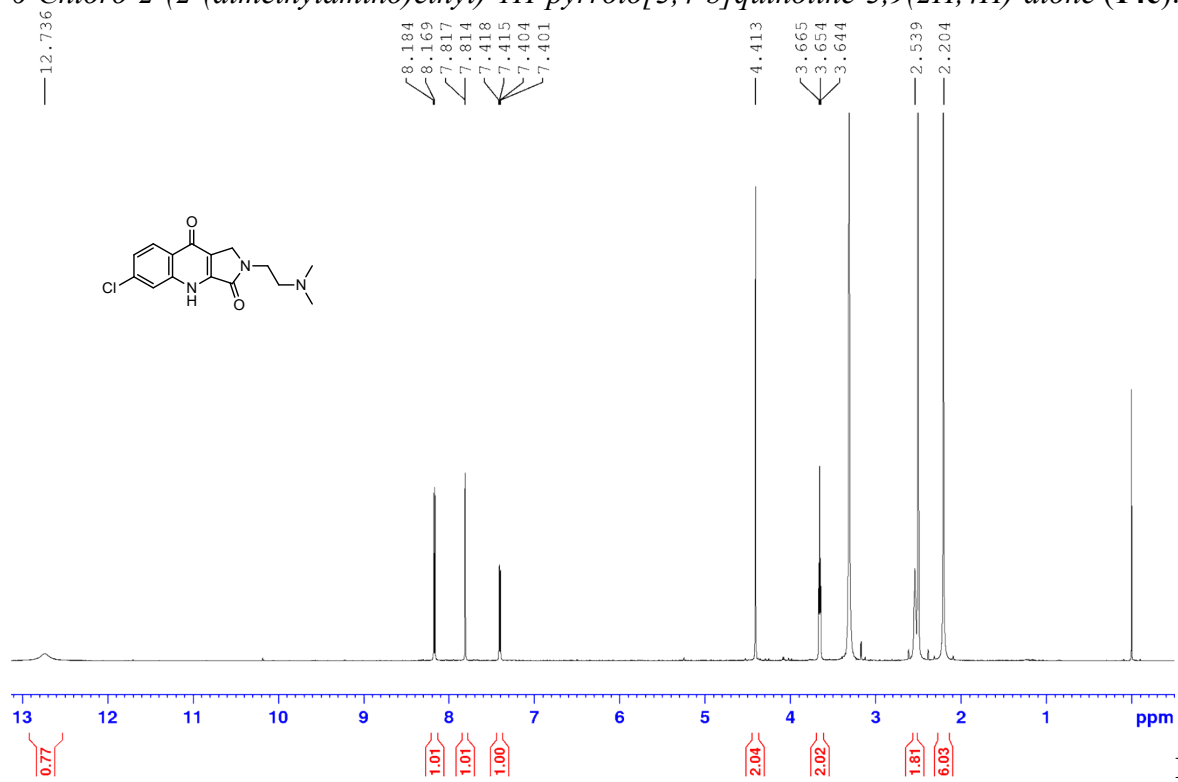

Figure S54. <sup>1</sup>H-NMR spectrum of **14c**

Figur

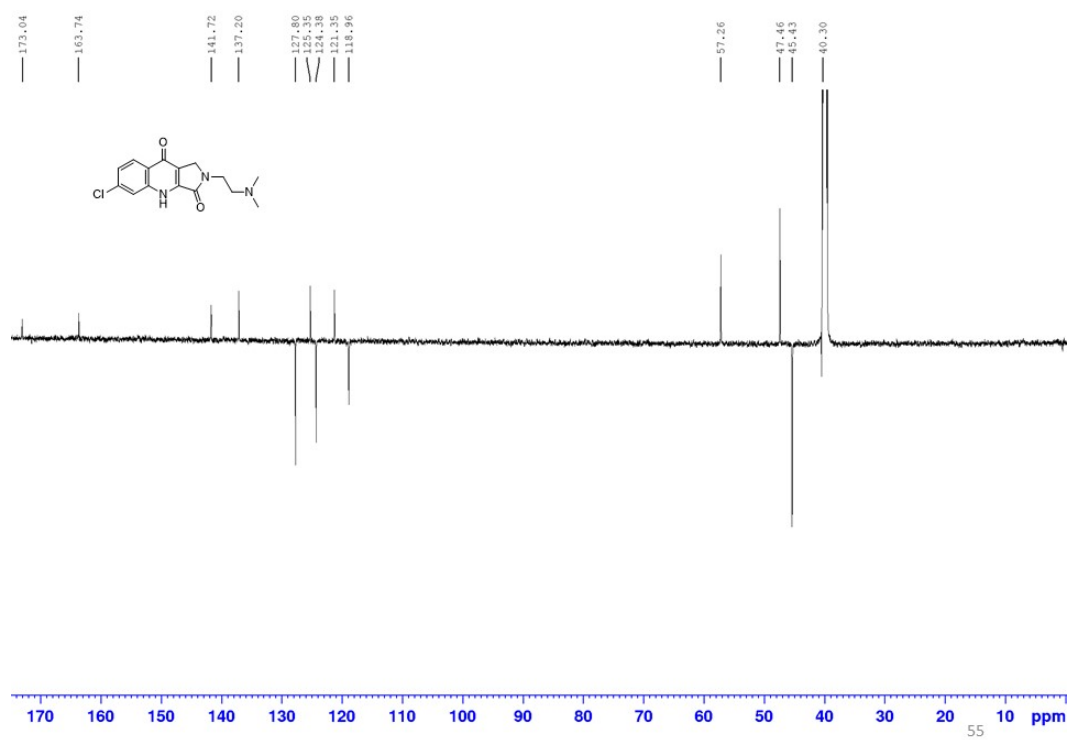

Figure S55. <sup>13</sup>C-NMR spectrum of **14c**

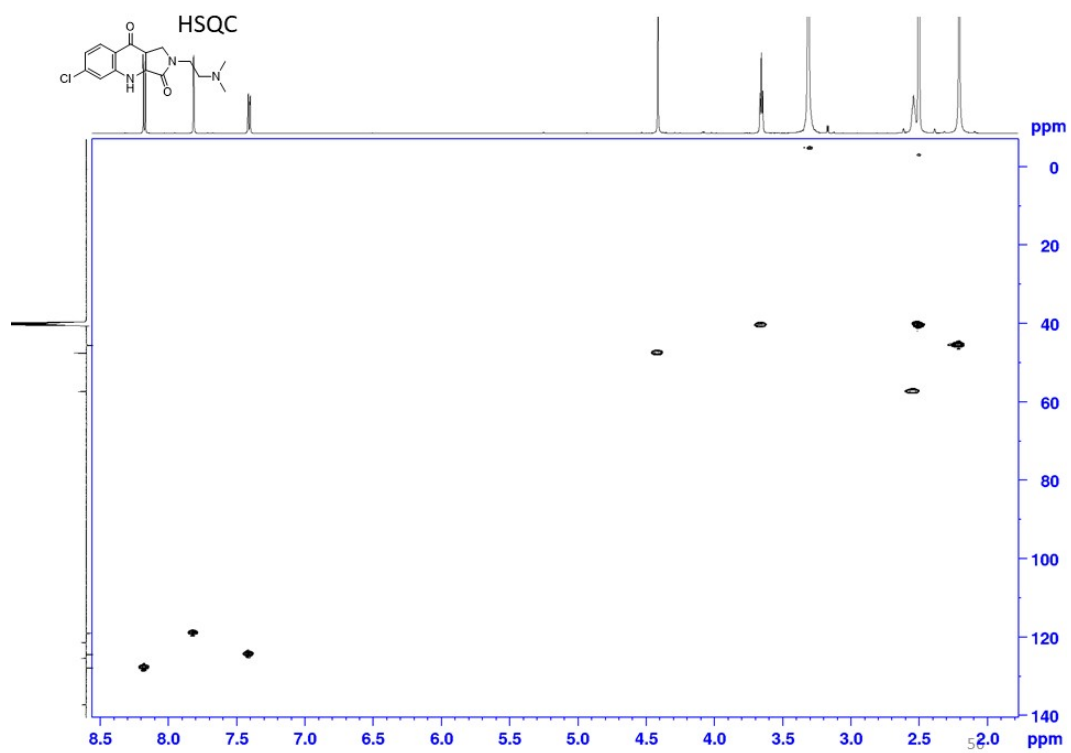

Figure S56. HSQC NMR spectrum of **14c**

2-(2-(Dimethylamino)ethyl)-5-methyl-1H-pyrrolo[3,4-b]quinoline-3,9(2H,4H)-dione (**14d**):

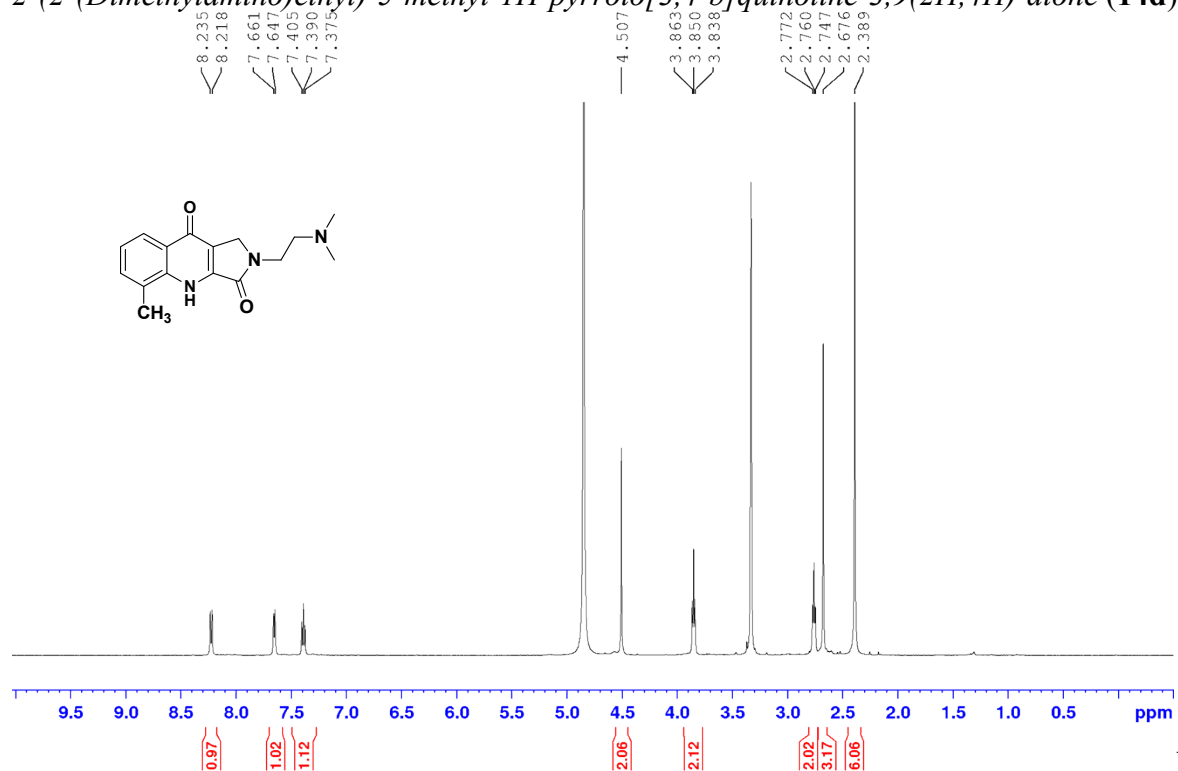

Figure

e S57. <sup>1</sup>H-NMR spectrum of **14d**

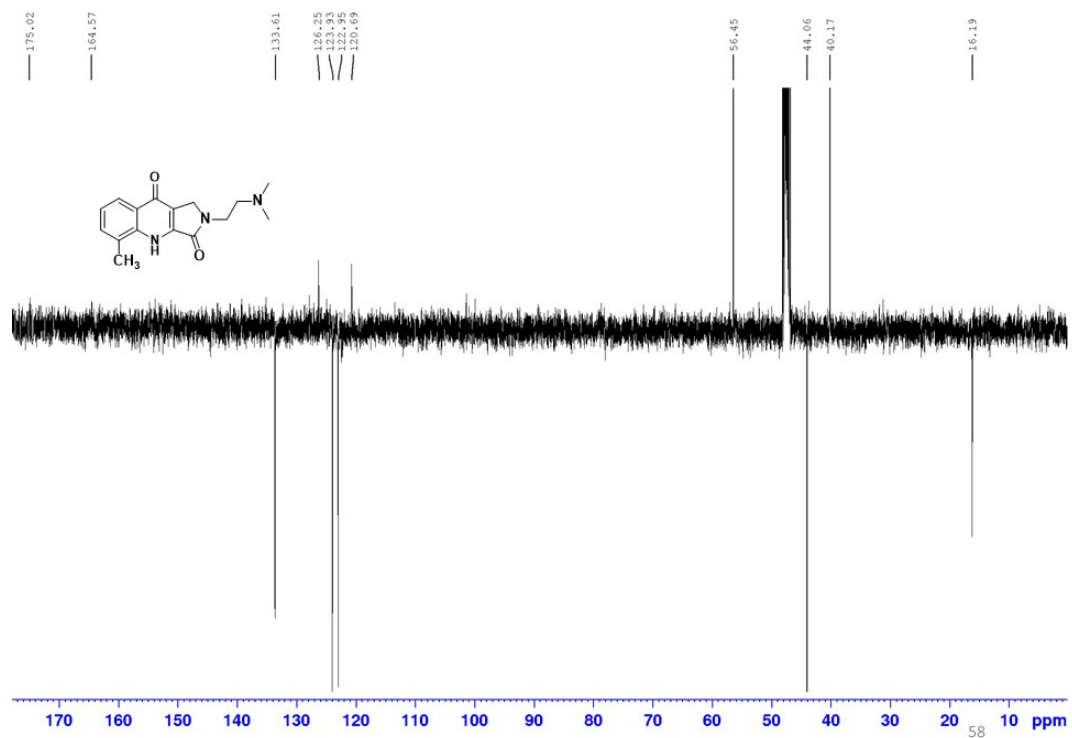

Figure S58. <sup>13</sup>C-NMR spectrum of **14d**



3,3'-Methylenebis(4-oxo-N-phenyl-1,4-dihydroquinoline-2-carboxamide) (**10a**):

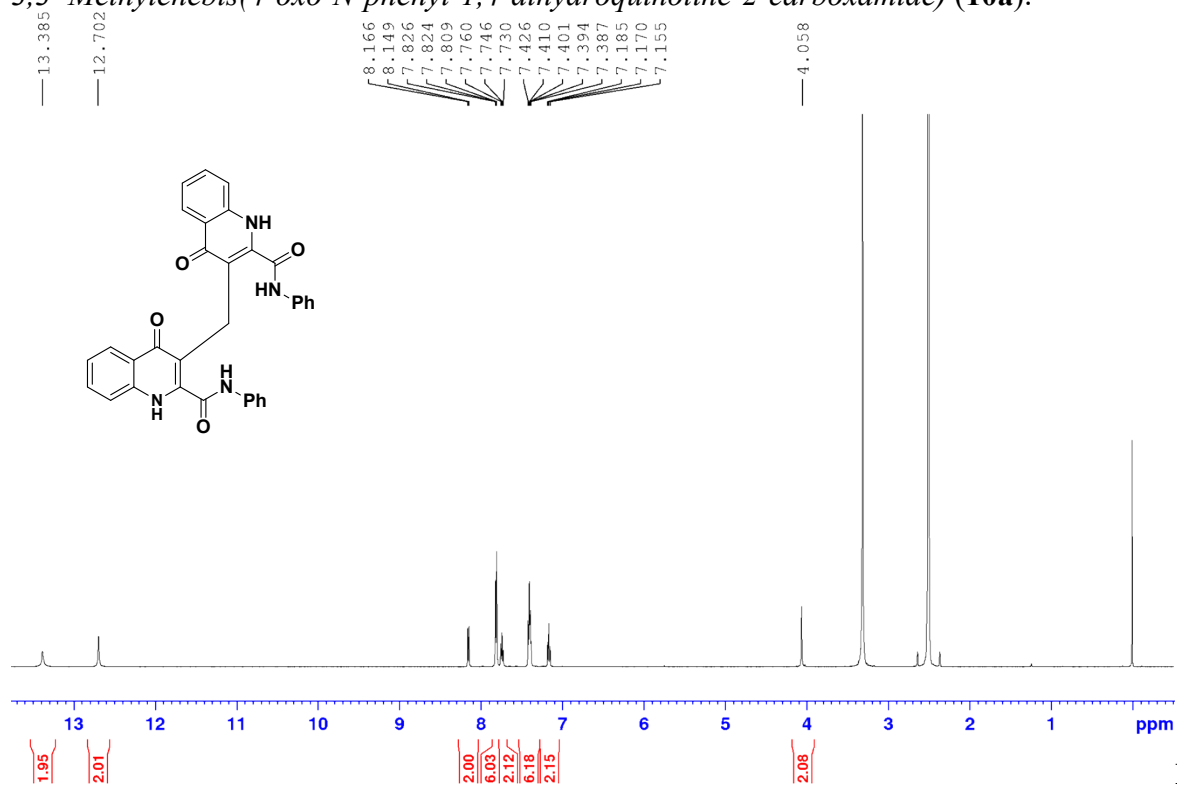

Figur

e S59.  $^1\text{H-NMR}$  spectrum of **10a**

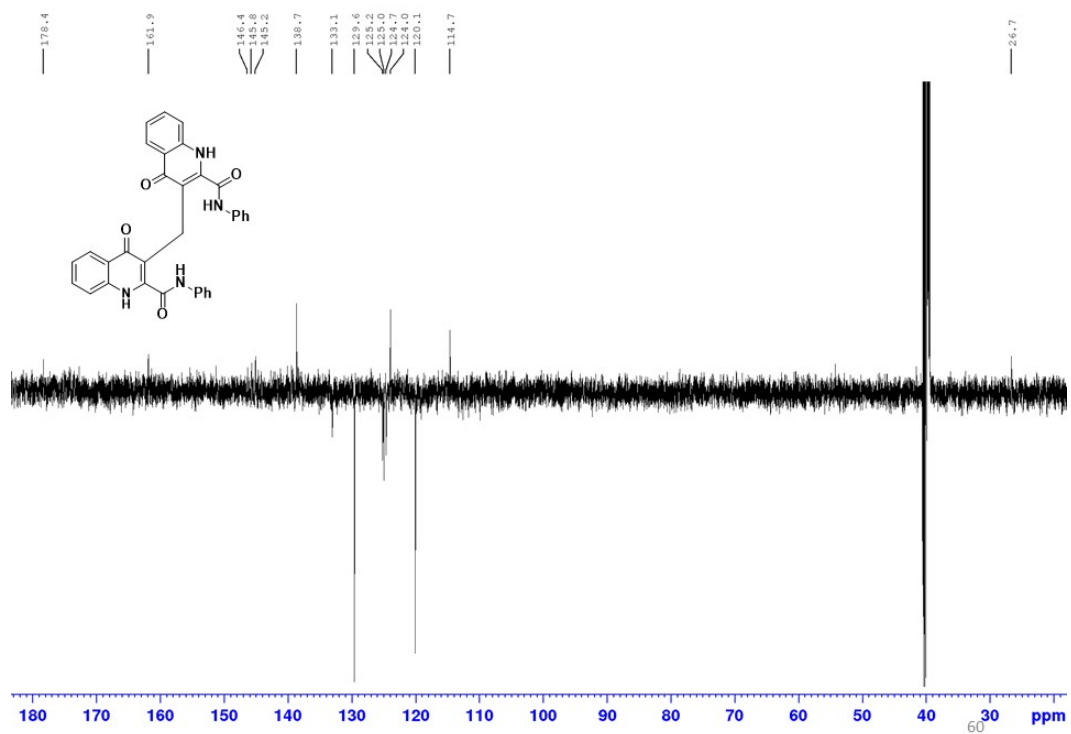

Figure S60.  $^{13}\text{C-NMR}$  spectrum of **10a**

3,3'-Methylenebis(N-benzyl-4-oxo-1,4-dihydroquinoline-2-carboxamide) (**10b**):

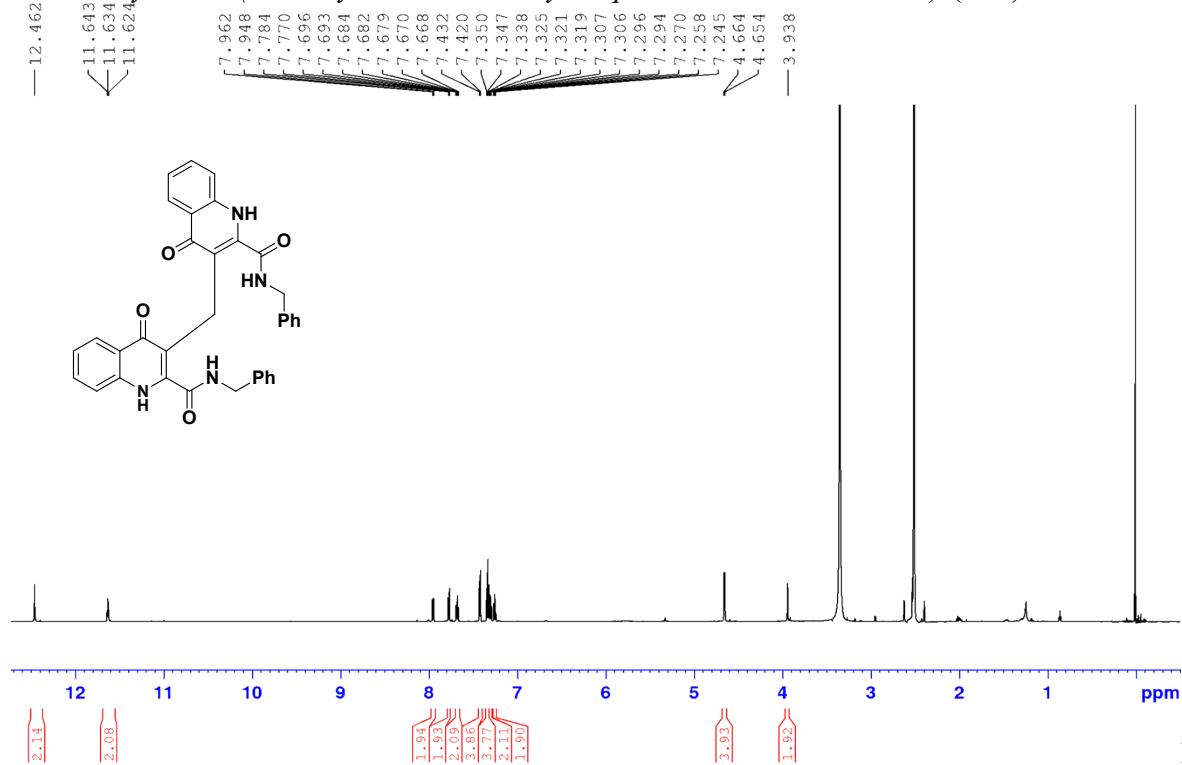

Figure S61. <sup>1</sup>H-NMR spectrum of **10b**

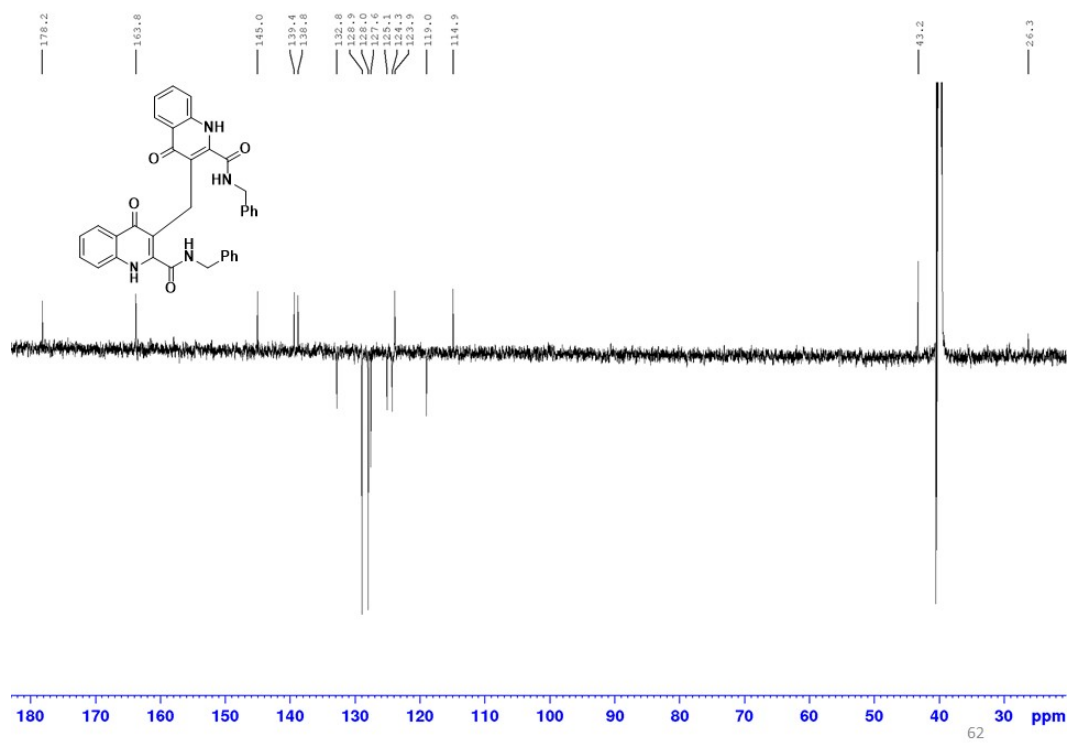

Figure S62. <sup>13</sup>C-NMR spectrum of **10b**

3,3'-Methylenebis(4-oxo-N-propyl-1,4-dihydroquinoline-2-carboxamide) (**10d**):

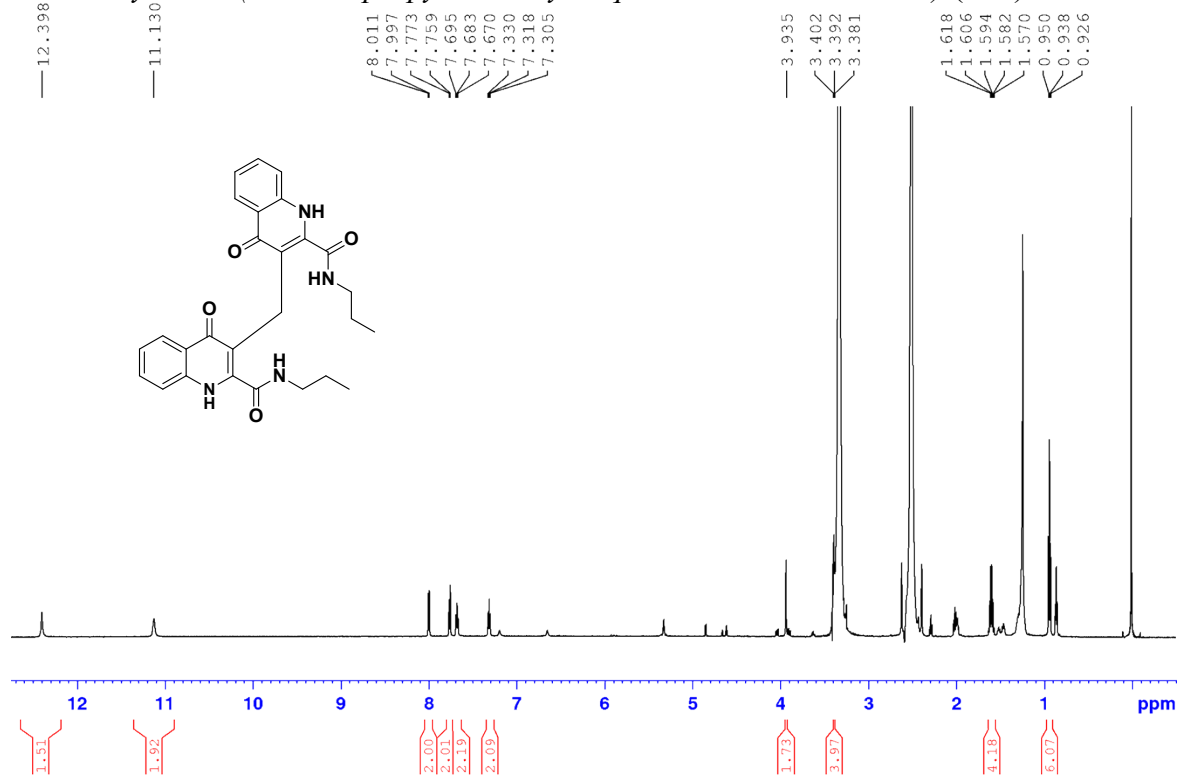

e S63. <sup>1</sup>H-NMR spectrum of **10d**

Figur

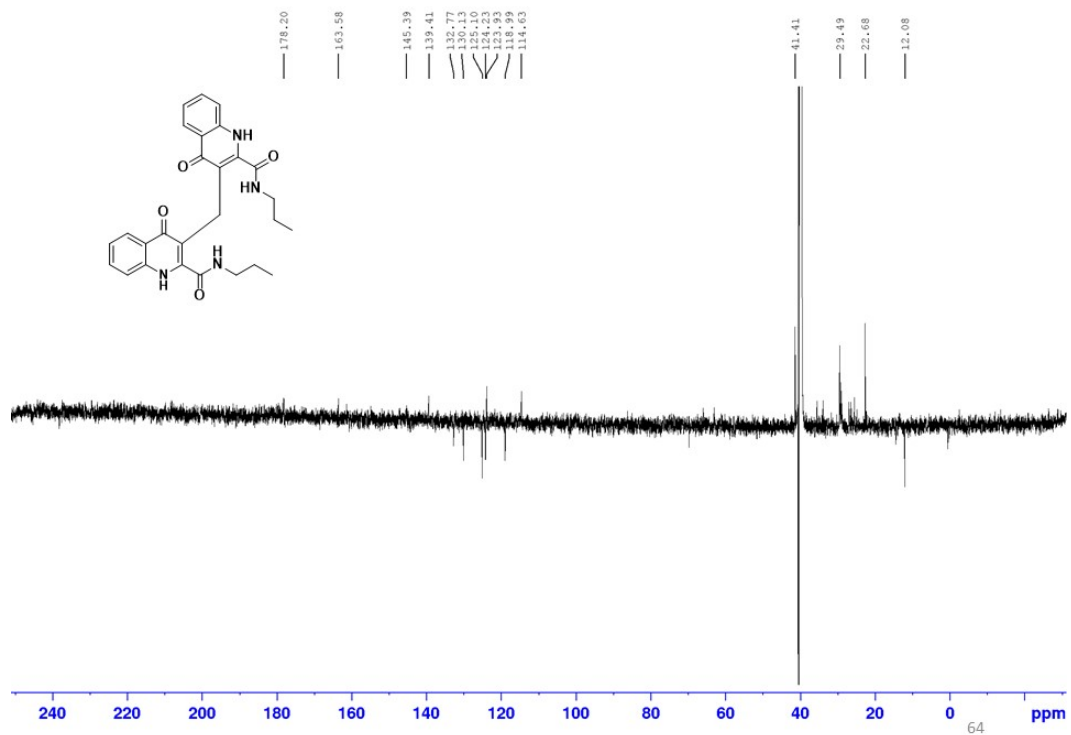

Figure S64. <sup>13</sup>C-NMR spectrum of **10d**

3,3'-Methylenebis(5-chloro-N-(2-(dimethylamino)ethyl)-4-oxo-1,4-dihydroquinoline-2-carboxamide) (**15a**):

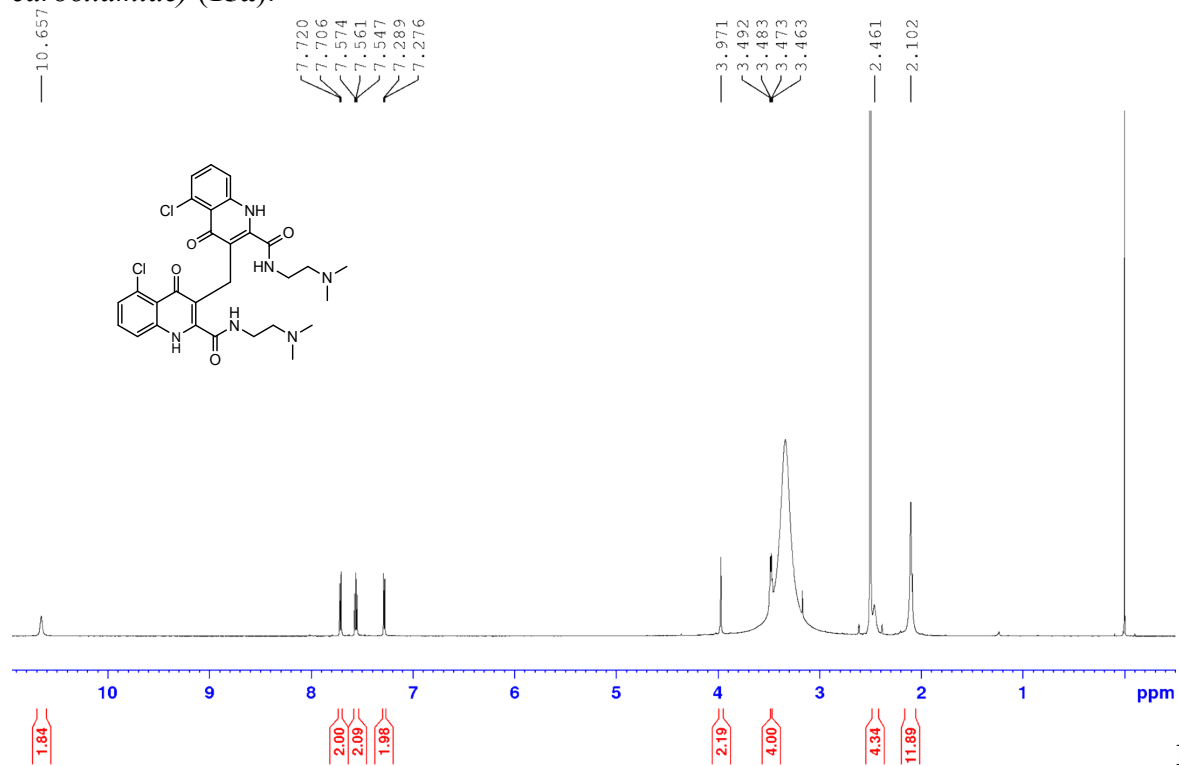

Figur

e S65. <sup>1</sup>H-NMR spectrum of **15a**

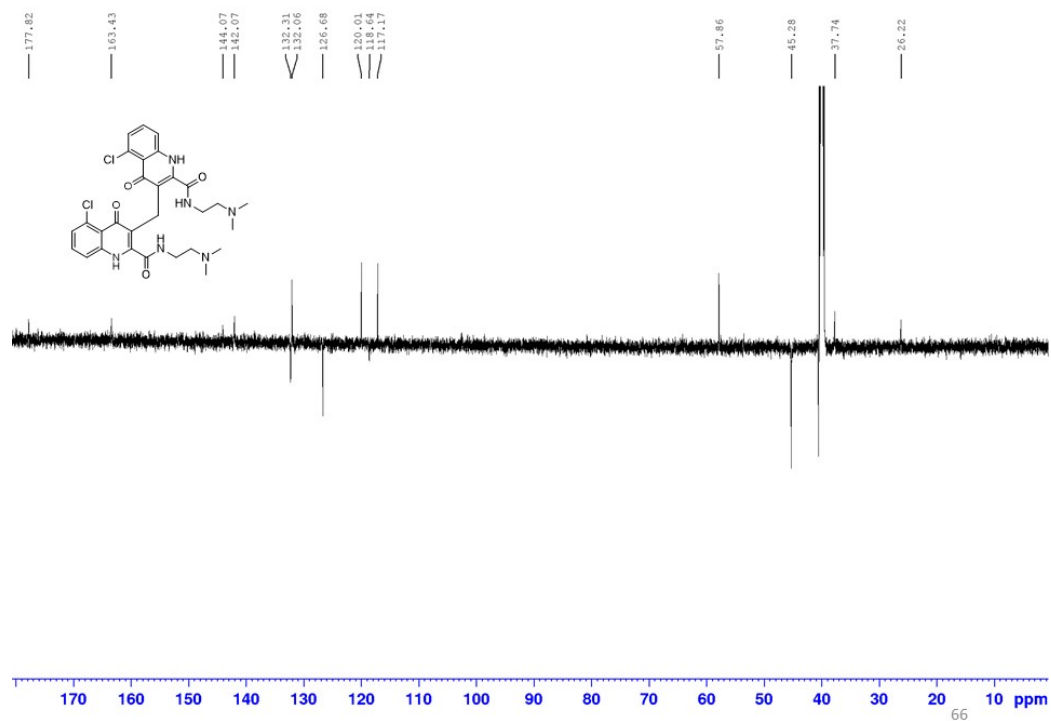

Figure S66.  $^{13}\text{C}$ -NMR spectrum of **15a**  
 3,3'-Methylenebis(7-chloro-N-(2-(dimethylamino)ethyl)-4-oxo-1,4-dihydroquinoline-2-carboxamide) (**15c**):

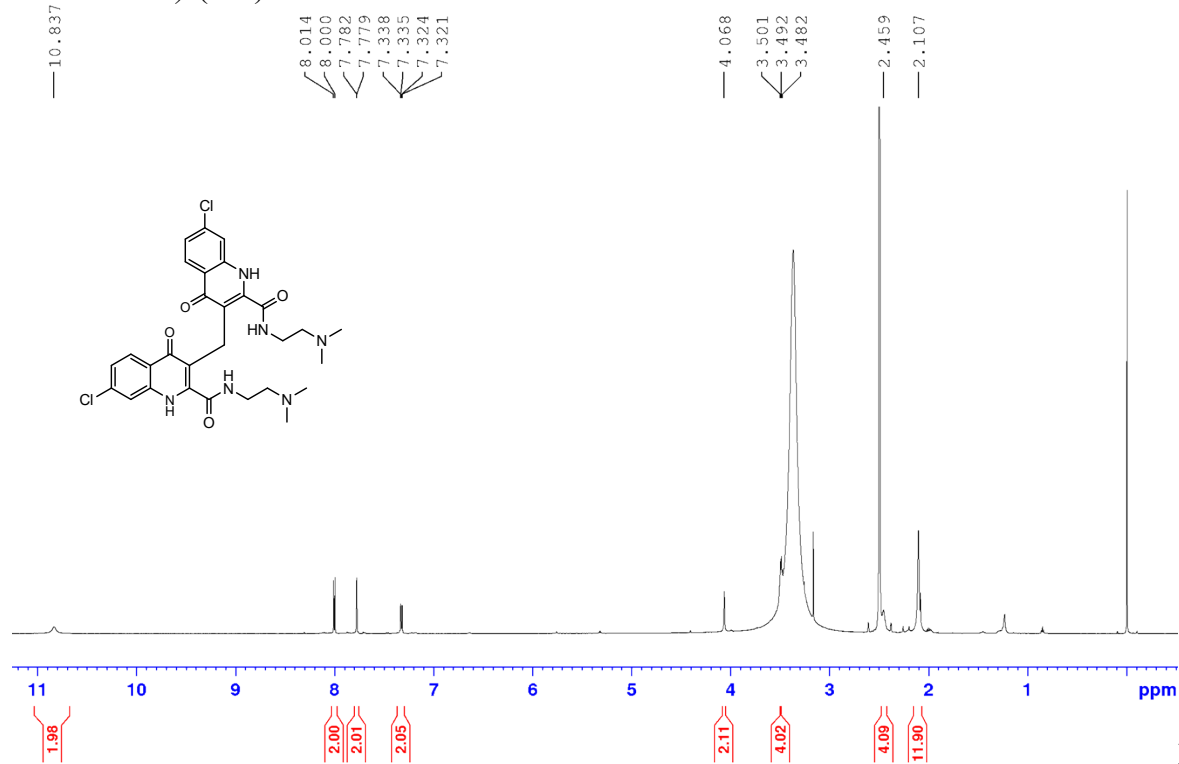

Figur

e S67.  $^1\text{H}$ -NMR spectrum of **15c**

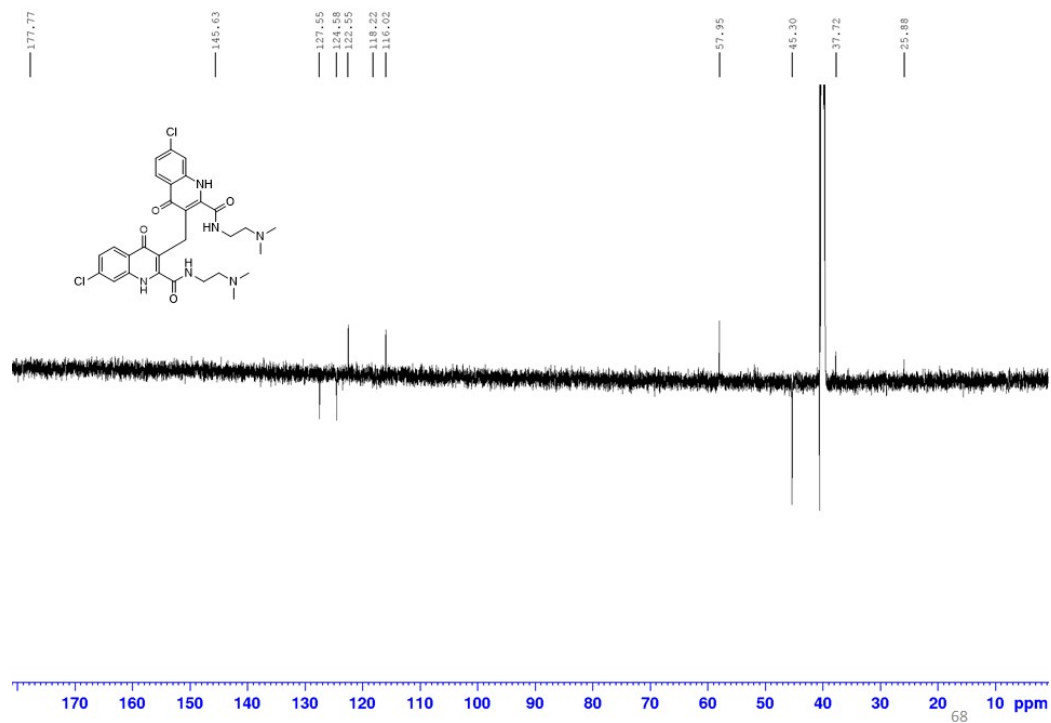

Figure S68.  $^{13}\text{C}$ -NMR spectrum of **15c**

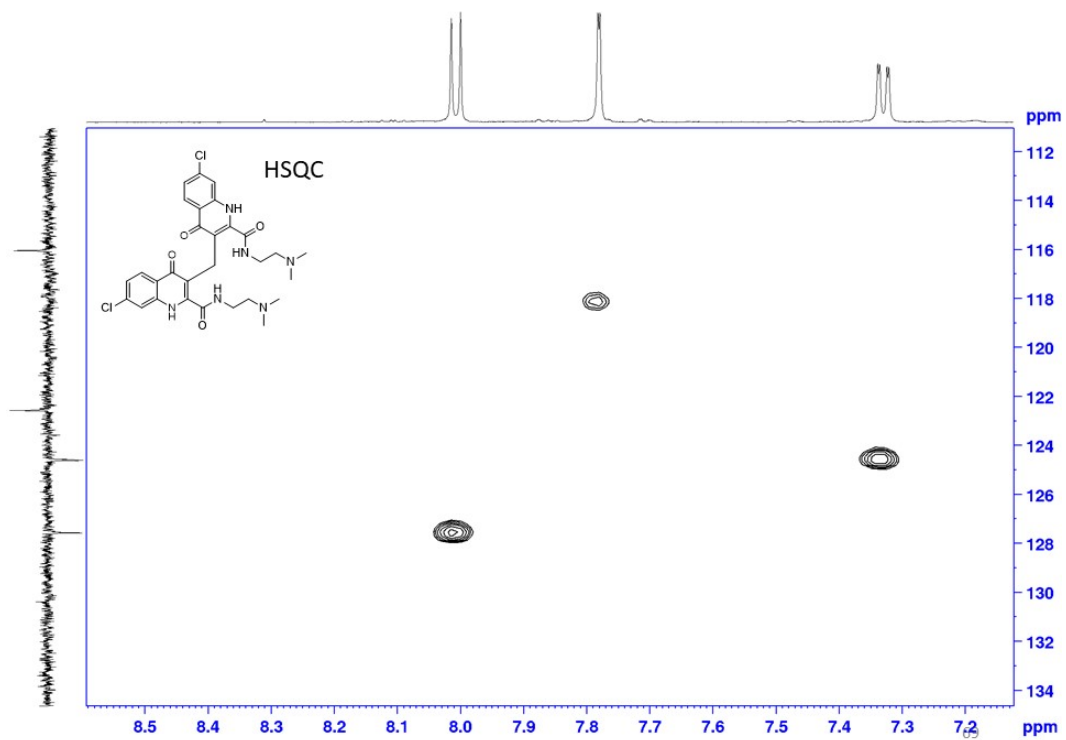

Figure S69. HSQC NMR spectrum of **15c**

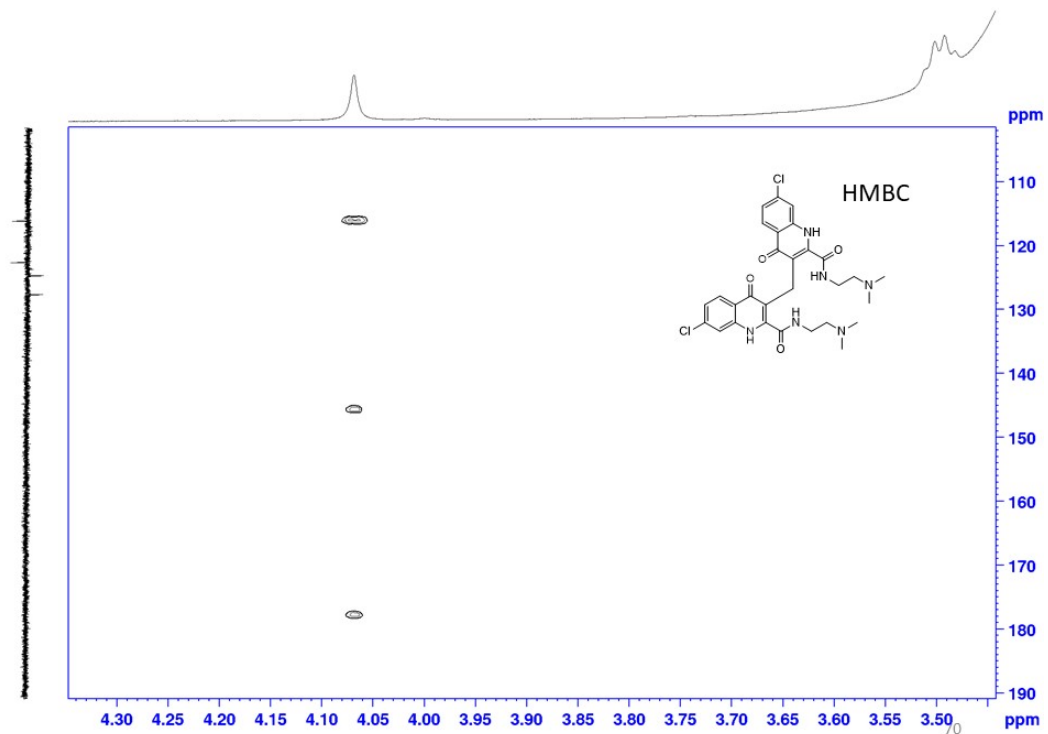

Figure S70. HMBC NMR spectrum of **15c**

*4-oxo-N-phenyl-1,4-dihydroquinoline-2-carboxamide (7a)*:

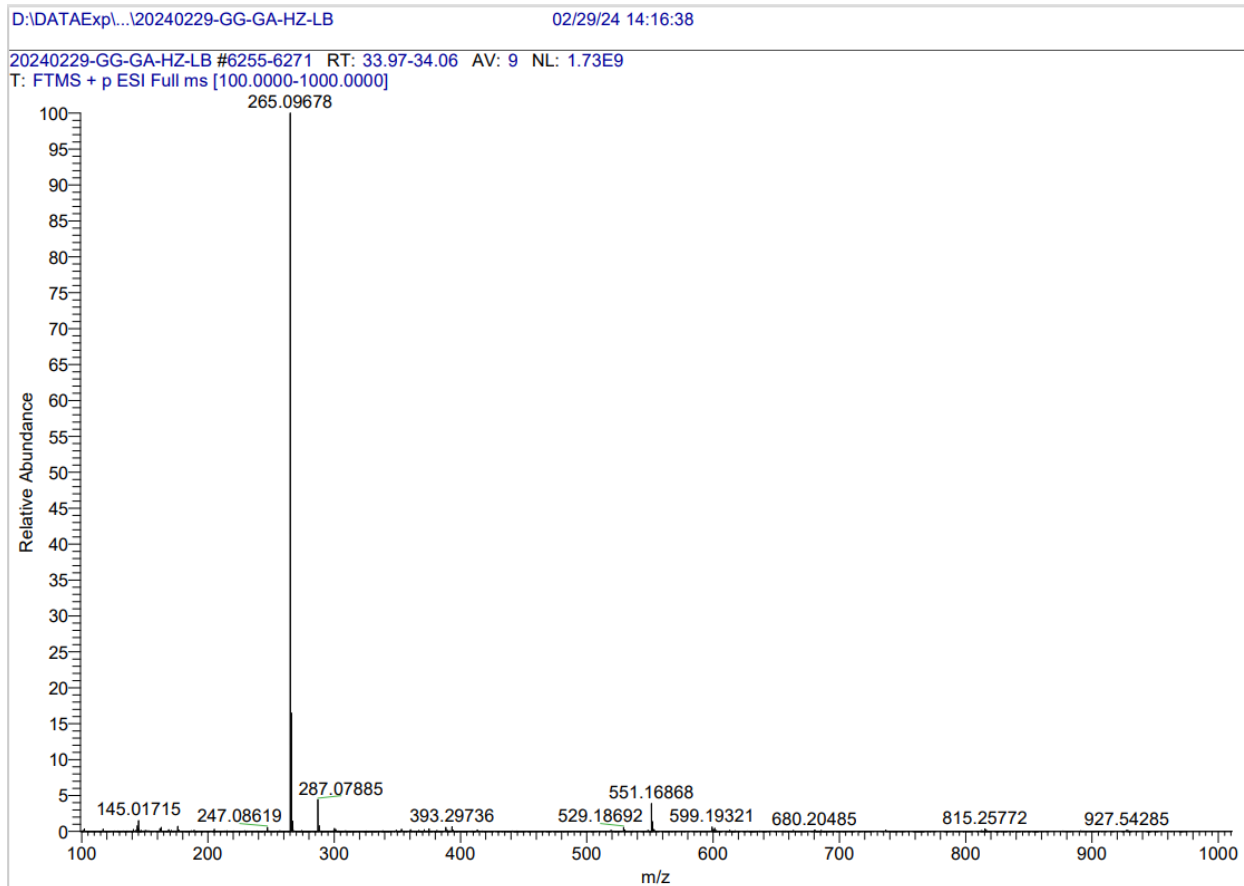

Figure S71. HR-MS spectrum of **7a** (mass accuracy of - 2.5 ppm)

*N*-benzyl-4-oxo-1,4-dihydroquinoline-2-carboxamide (**7b**):

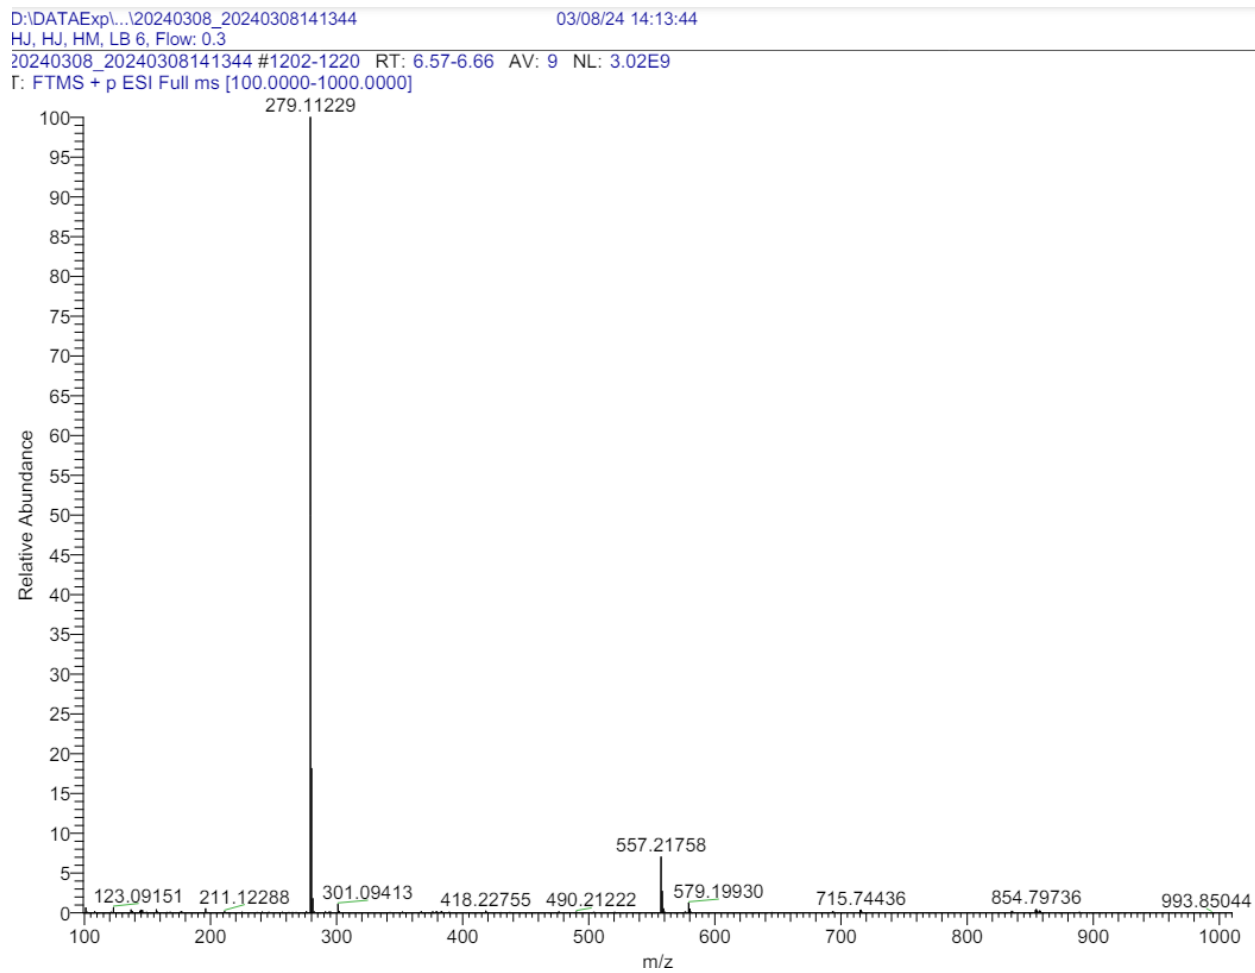

Figure S72. HR-MS spectrum of **7b** (mass accuracy of - 1.8 ppm)



4-oxo-N-phenethyl-1,4-dihydroquinoline-2-carboxamide (**7c**):

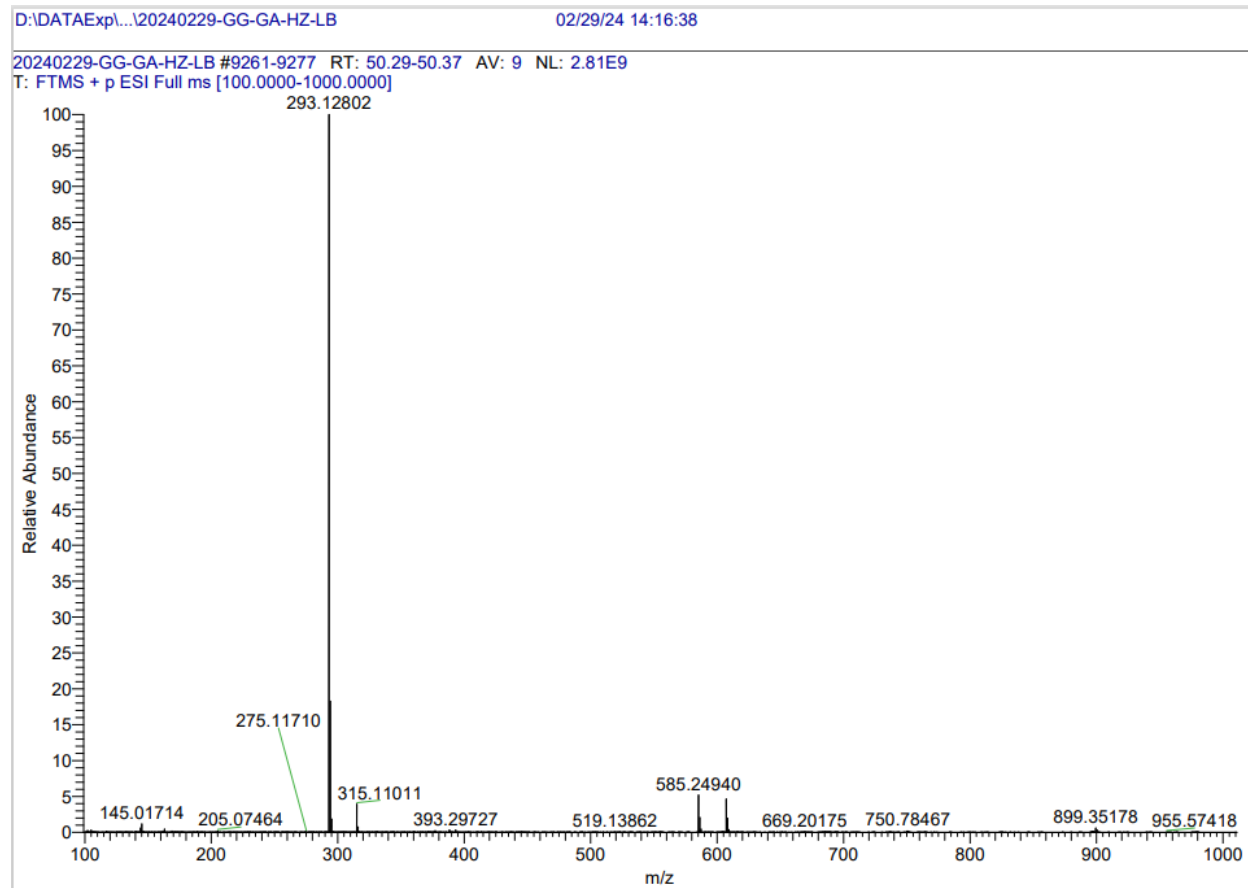

Figure S73. HR-MS spectrum of **7c** (mass accuracy of -1.5 ppm)

*4-oxo-N-propyl-1,4-dihydroquinoline-2-carboxamide (7d)*:

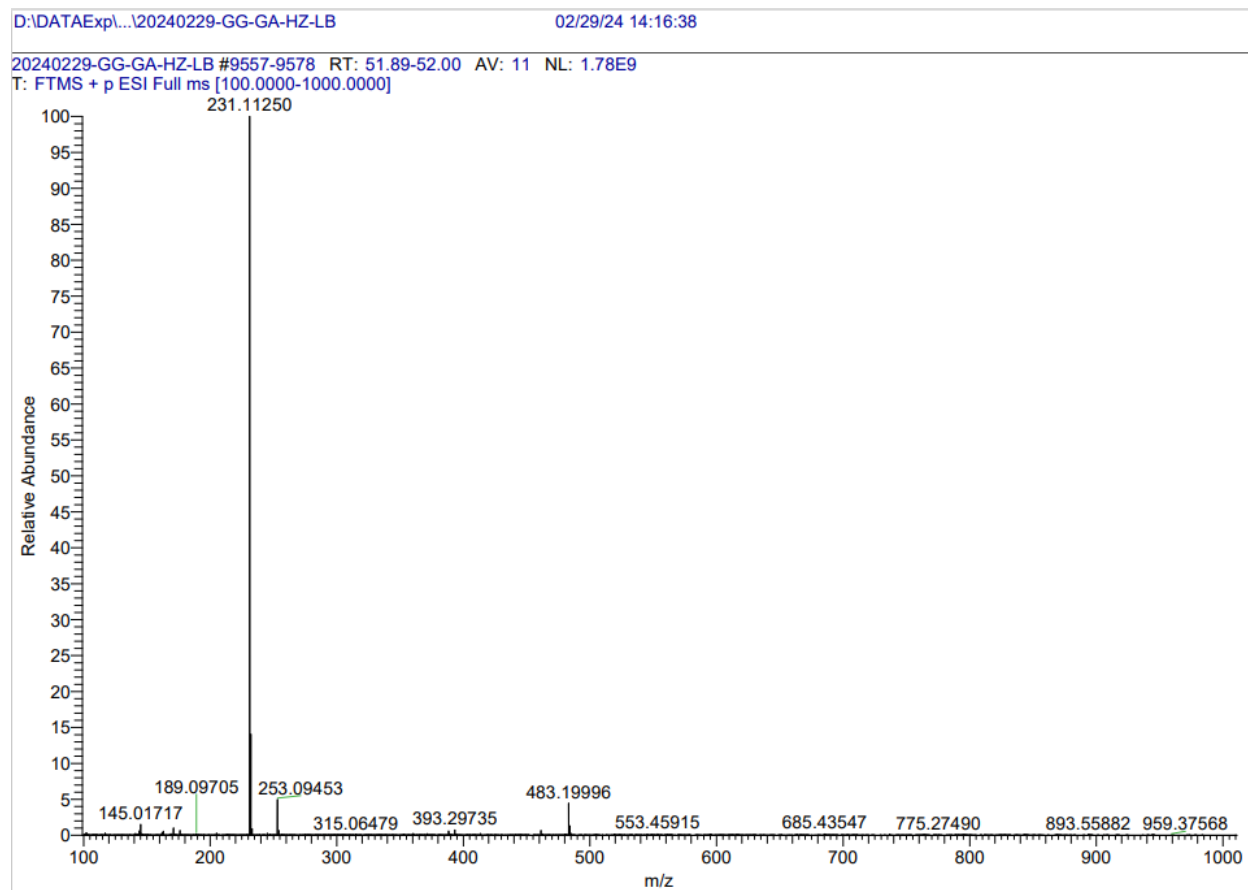

Figure S74. HR-MS spectrum of **7d** (mass accuracy of -1.3 ppm)

*5-Chloro-N-(2-(dimethylamino)ethyl)-4-oxo-1,4-dihydroquinoline-2-carboxamide (12a)*:

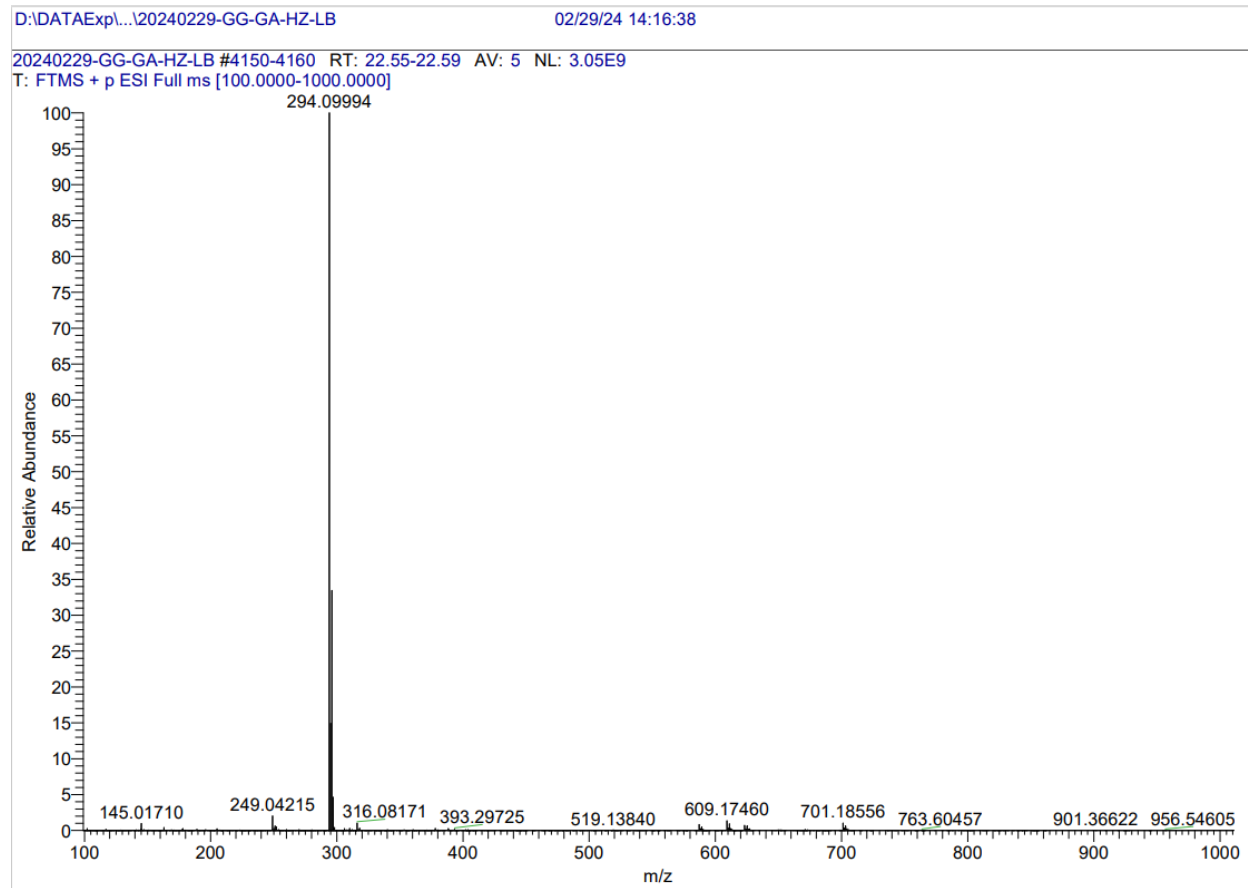

Figure S75. HR-MS spectrum of **12a** (mass accuracy of -1.5 ppm)

*N*-(2-(dimethylamino)ethyl)-4-oxo-6-phenyl-1,4-dihydroquinoline-2-carboxamide (**12b**):

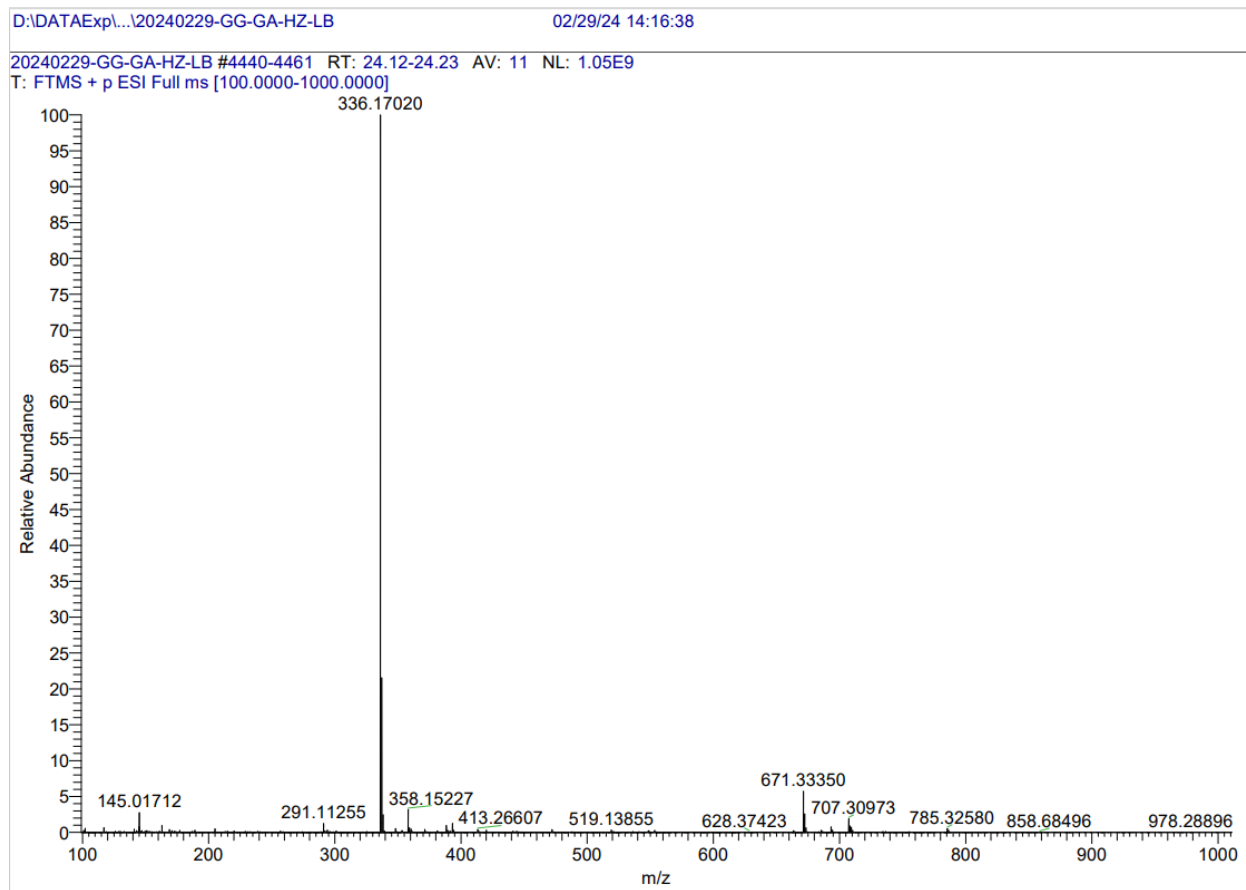

Figure S76. HR-MS spectrum of **12b** (mass accuracy of -1.3 ppm)

7-Chloro-N-(2-(dimethylamino)ethyl)-4-oxo-1,4-dihydroquinoline-2-carboxamide (**12c**):

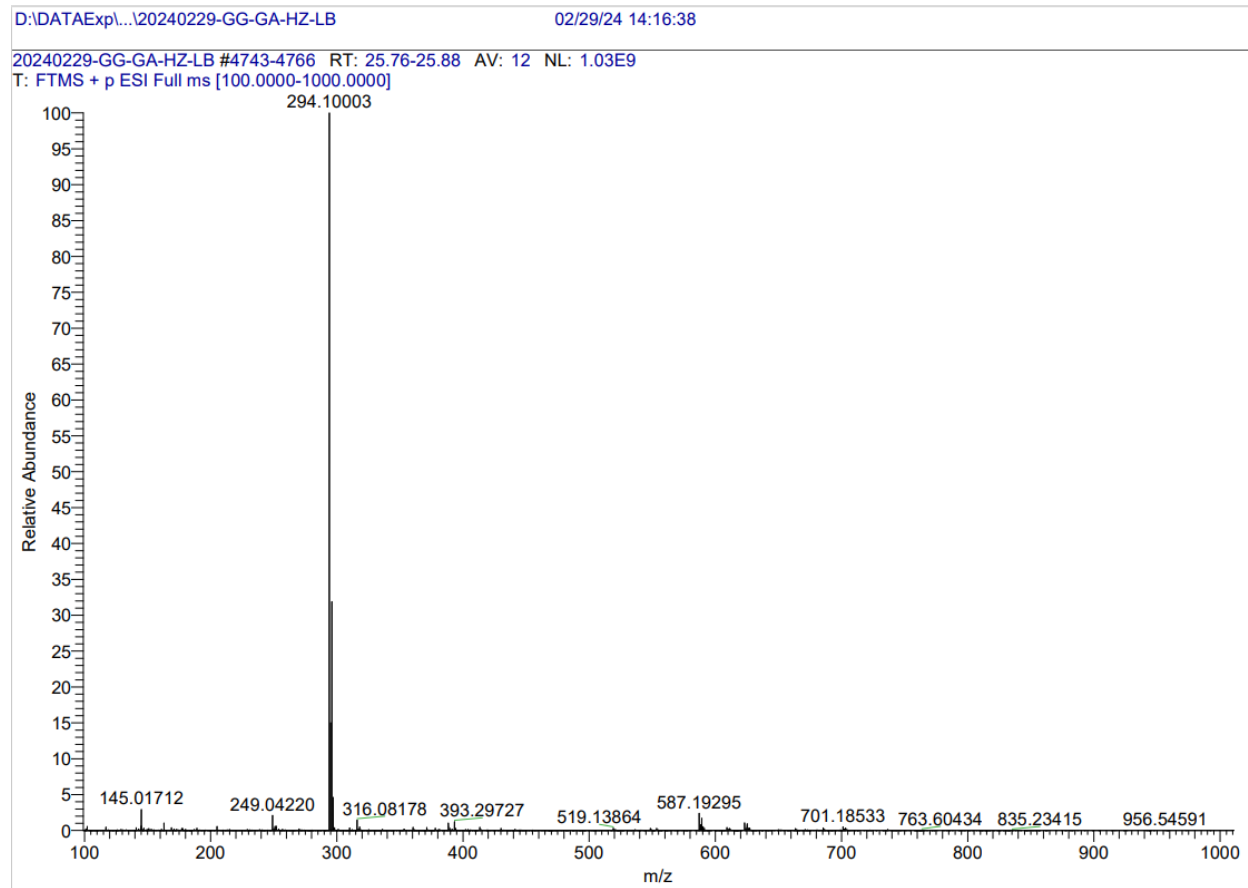

Figure S77. HR-MS spectrum of **12c** (mass accuracy of -1.2 ppm)

*N*-(2-(dimethylamino)ethyl)-8-methyl-4-oxo-1,4-dihydroquinoline-2-carboxamide (**12d**):

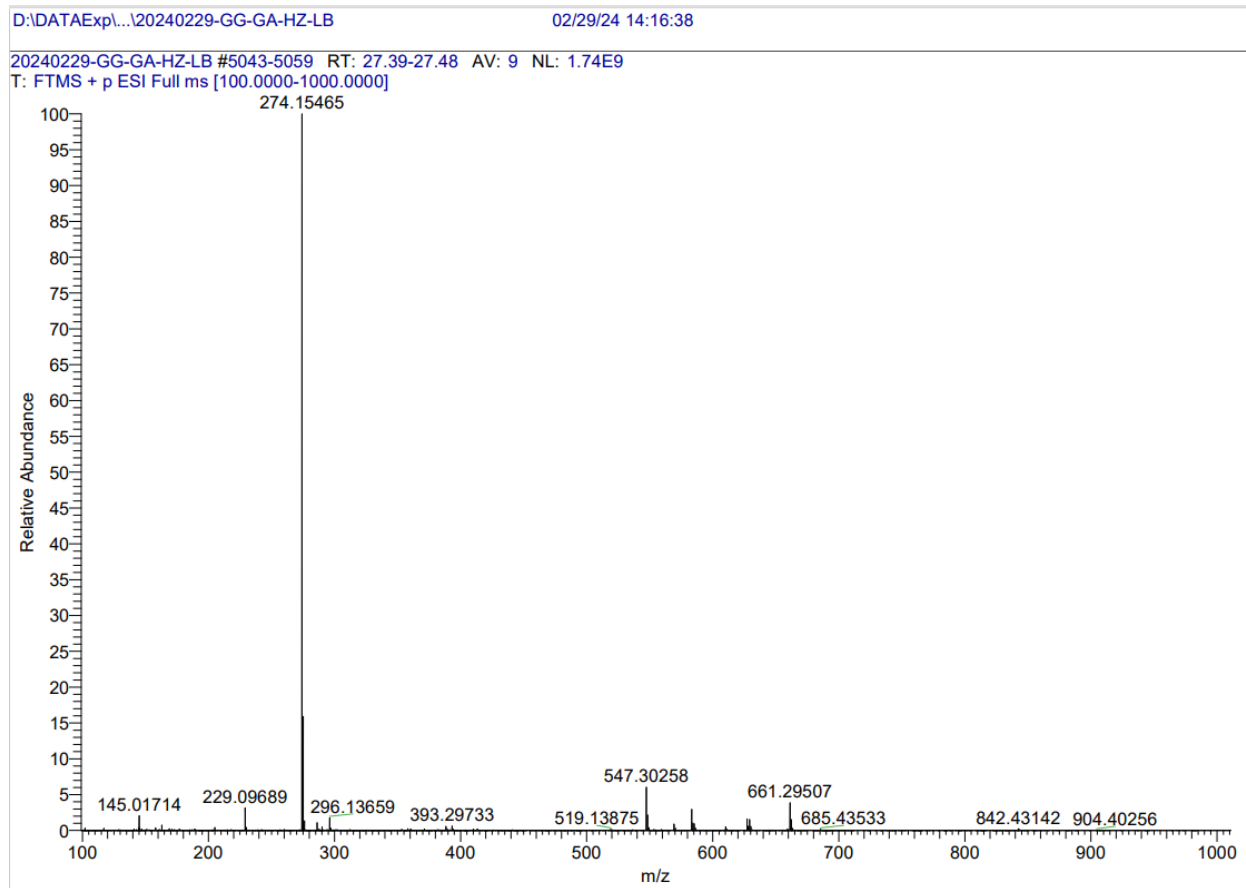

Figure S78. HR-MS spectrum of **12d** (mass accuracy of -1.3 ppm)

3-(Morpholinomethyl)-4-oxo-N-phenyl-1,4-dihydroquinoline-2-carboxamide (**8a**):

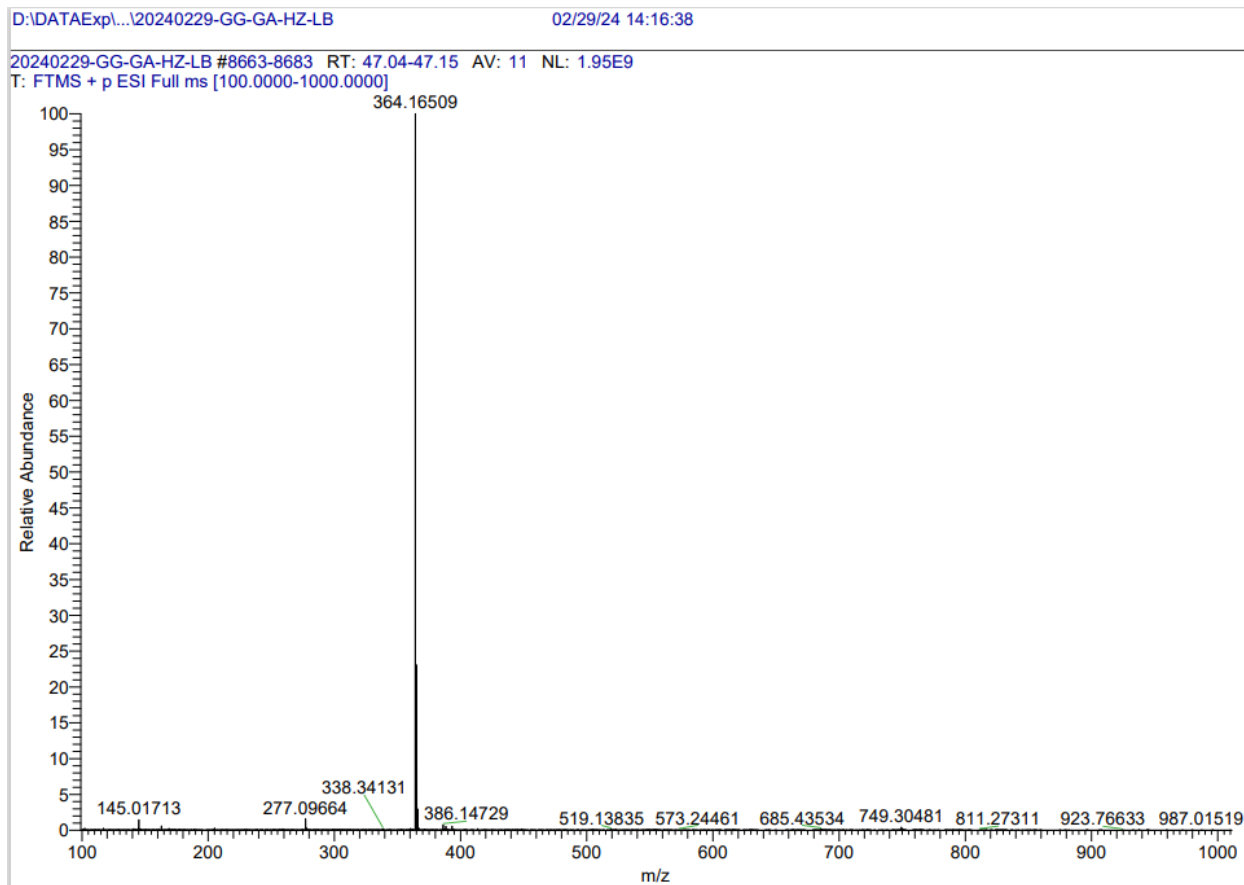

Figure S79. HR-MS spectrum of **8a** (mass accuracy of -1.3 ppm)

*N*-benzyl-3-(morpholinomethyl)-4-oxo-1,4-dihydroquinoline-2-carboxamide (**8b**):

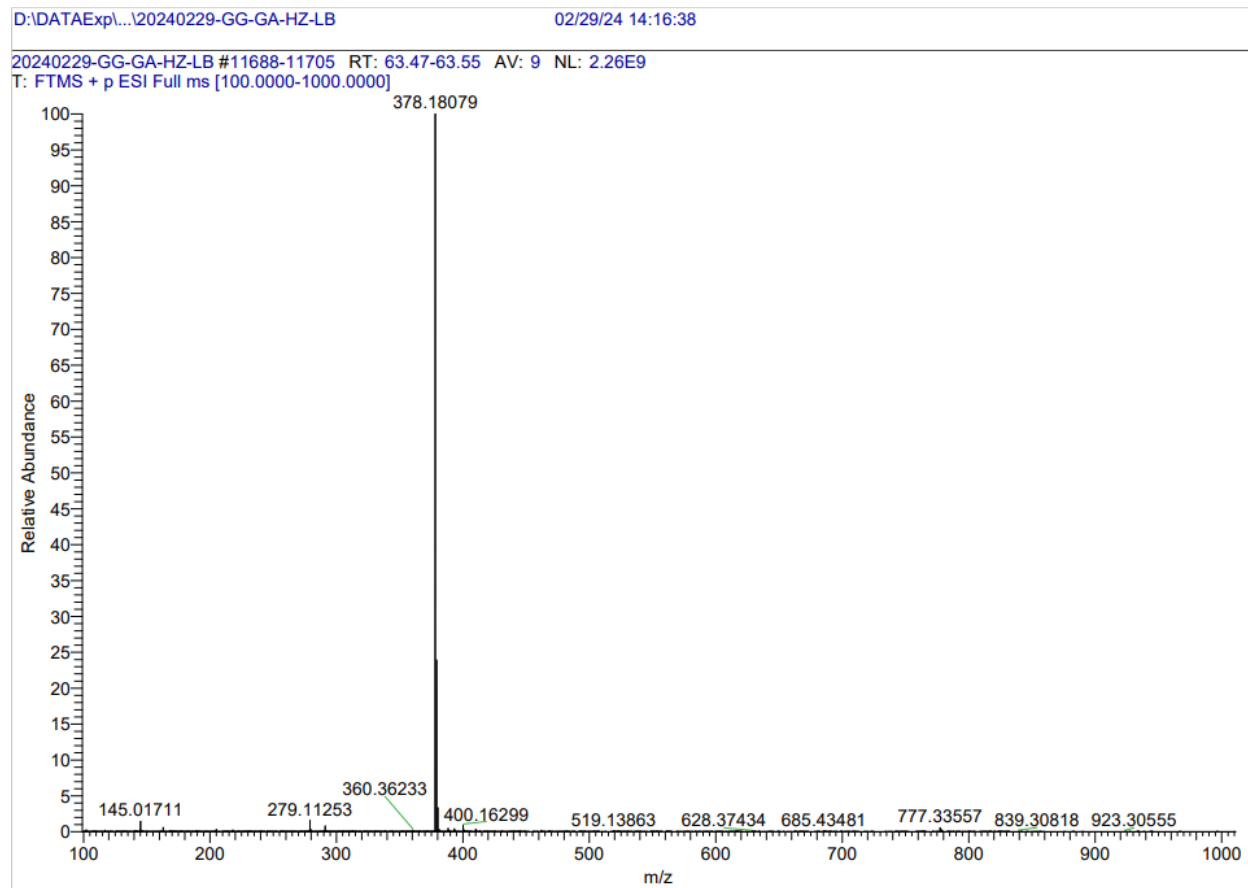

Figure S80. HR-MS spectrum of **8b** (mass accuracy of -1.1 ppm)



*3-(Morpholinomethyl)-4-oxo-N-phenethyl-1,4-dihydroquinoline-2-carboxamide (8c)*:

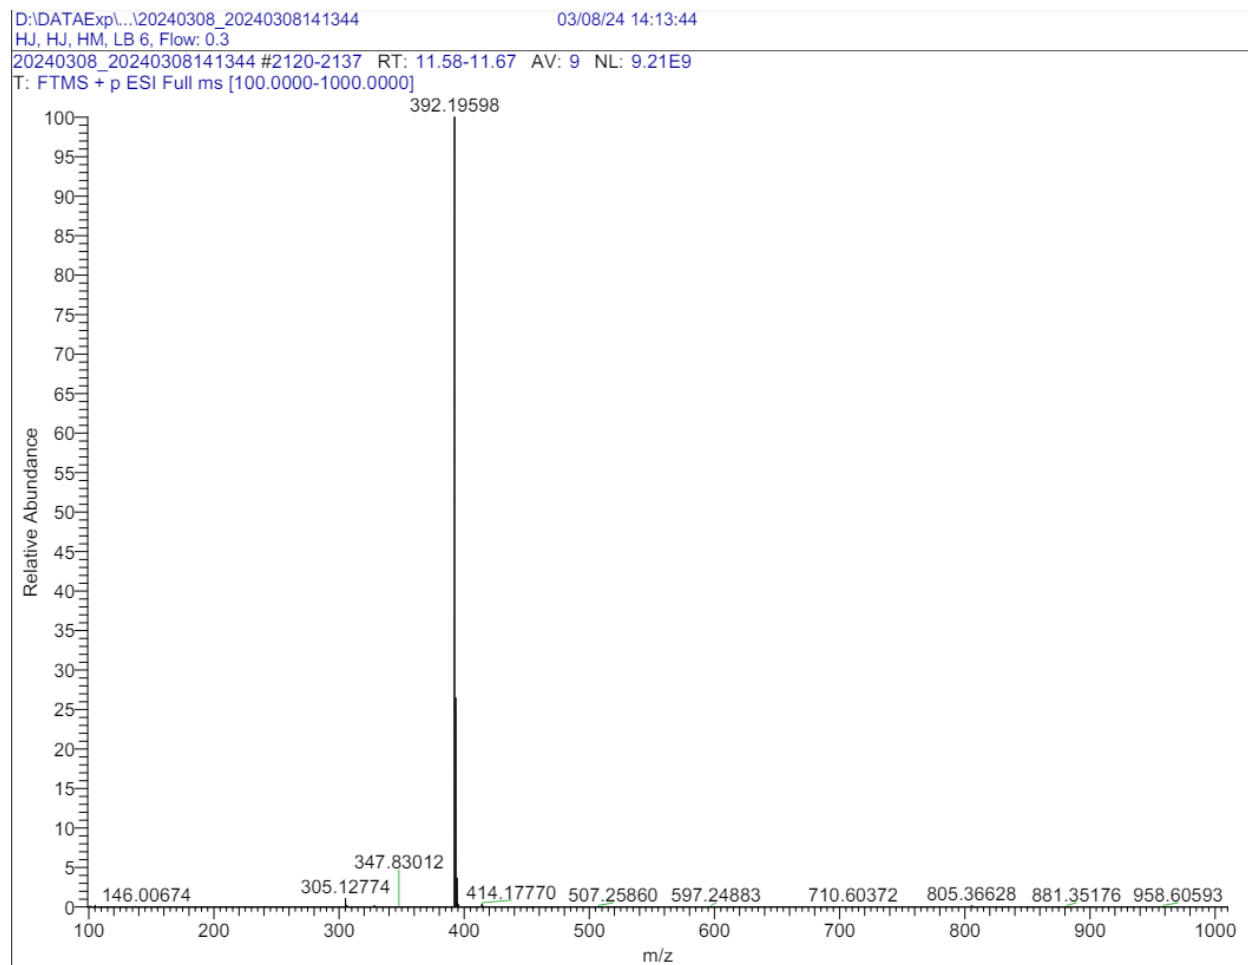

Figure S81. HR-MS spectrum of **8c** (mass accuracy of -2.3 ppm)

*3-(Morpholinomethyl)-4-oxo-N-propyl-1,4-dihydroquinoline-2-carboxamide (8d)*:

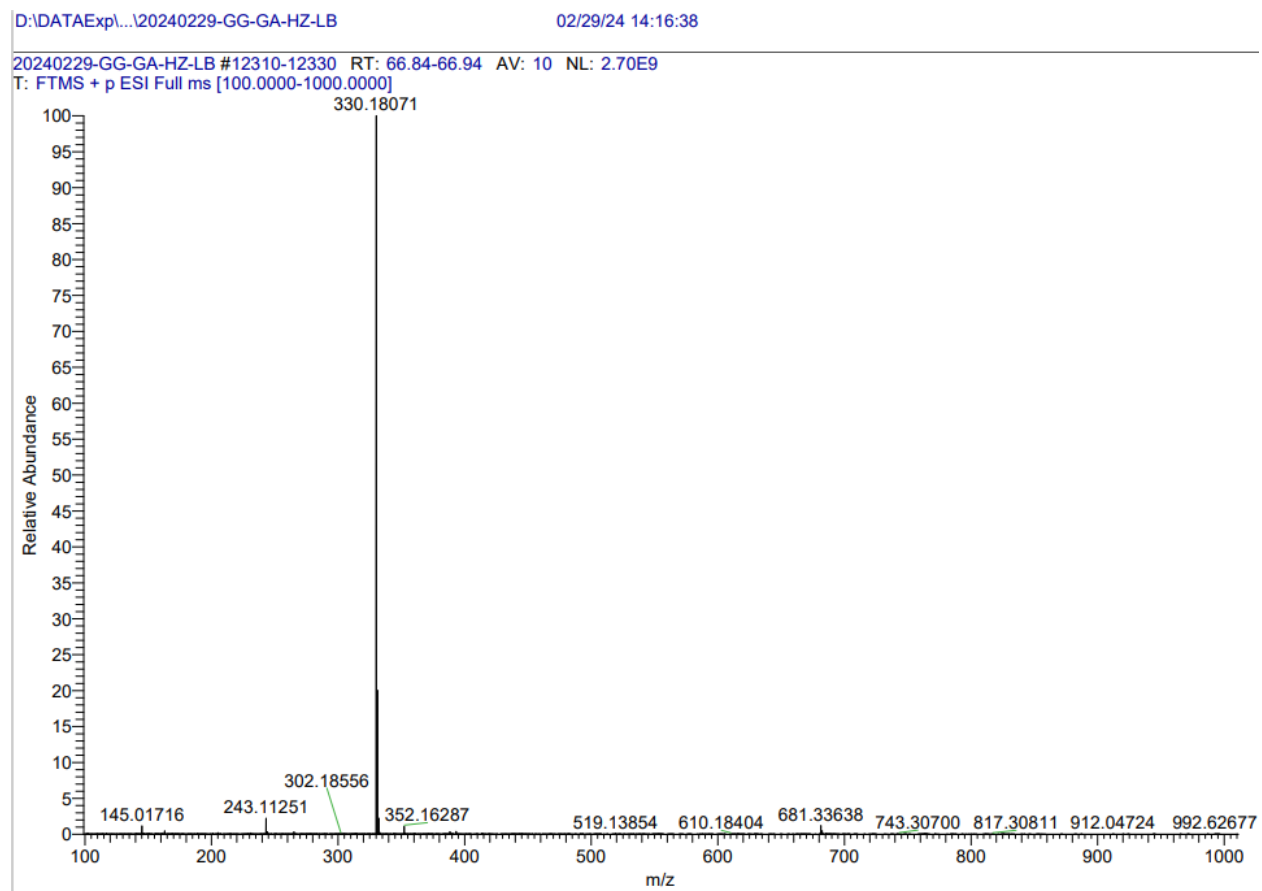

Figure S82. HR-MS spectrum of **8d** (mass accuracy of -1.5 ppm)

*N*-(3-(dimethylamino)propyl)-3-(morpholinomethyl)-4-oxo-1,4-dihydroquinoline-2-carboxamide (**8e**):

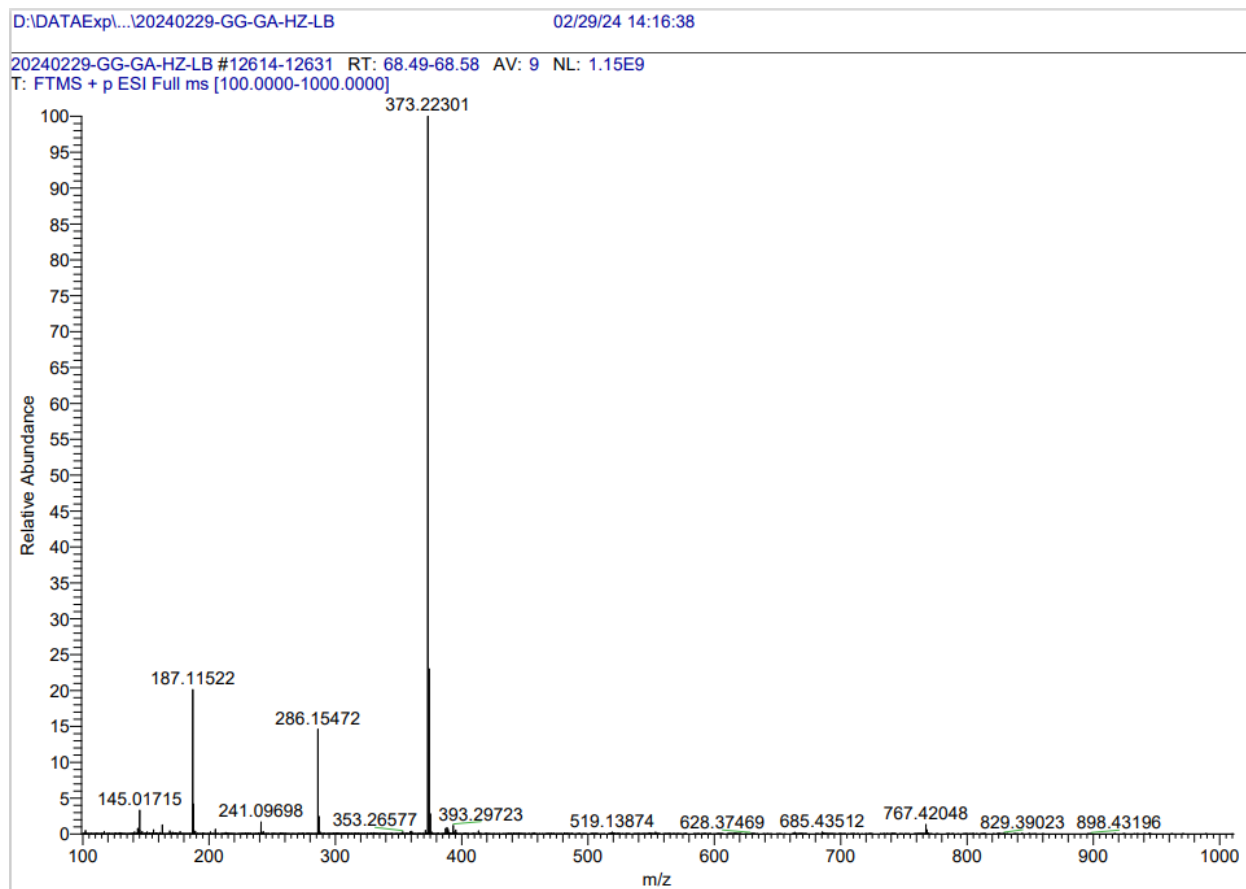

Figure S83. HR-MS spectrum of **8e** (mass accuracy of -1.1 ppm)

*5-Chloro-N-(2-(dimethylamino)ethyl)-3-(morpholinomethyl)-4-oxo-1,4-dihydroquinoline-2-carboxamide (13a)*:

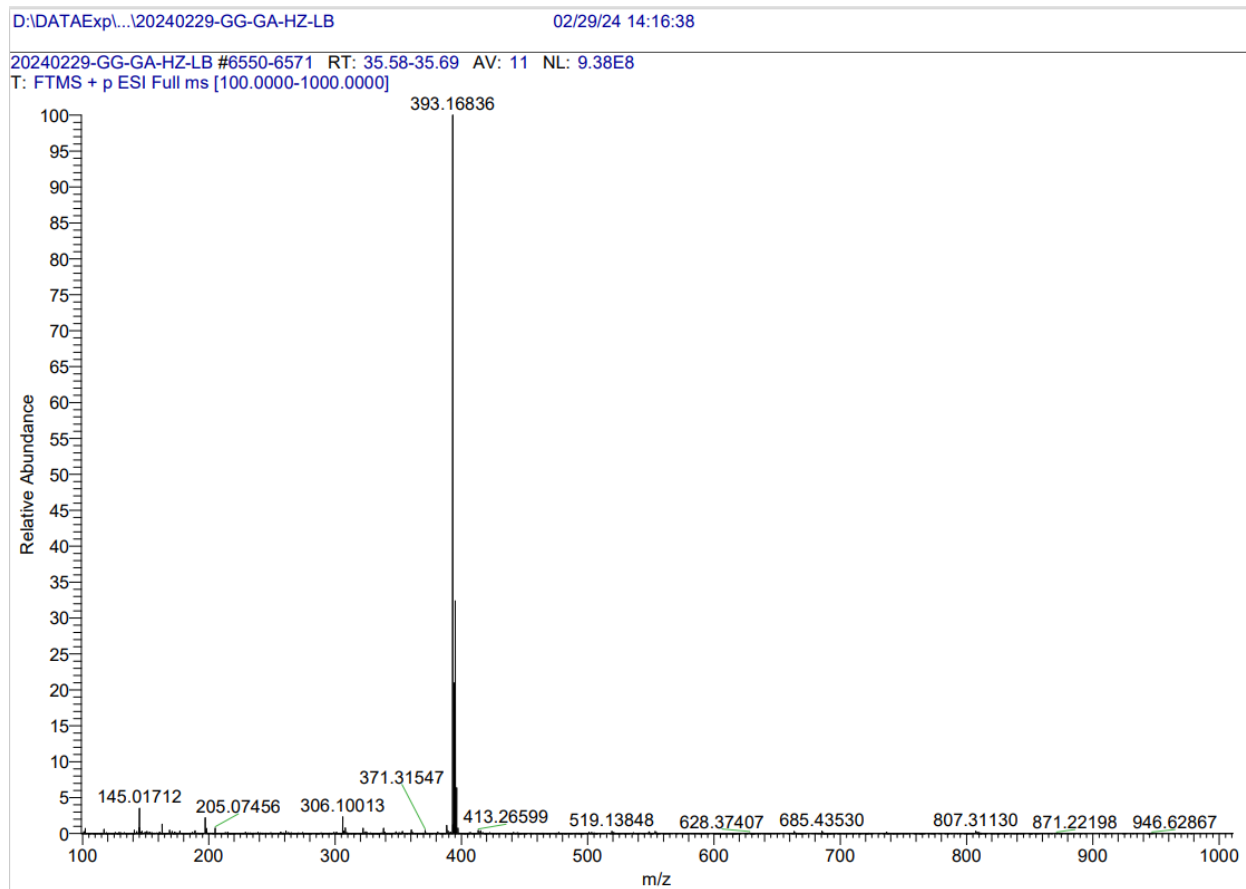

Figure S84. HR-MS spectrum of **13a** (mass accuracy of -1.1 ppm)

*N*-(2-(dimethylamino)ethyl)-3-(morpholinomethyl)-4-oxo-6-phenyl-1,4-dihydroquinoline-2-carboxamide (**13b**):

D:\DATAExp\...20240229-GG-GA-HZ-LB

02/29/24 14:16:38

20240229-GG-GA-HZ-LB #6850-6874 RT: 37.21-37.32 AV: 12 NL: 1.10E9

T: FTMS + p ESI Full ms [100.0000-1000.0000]

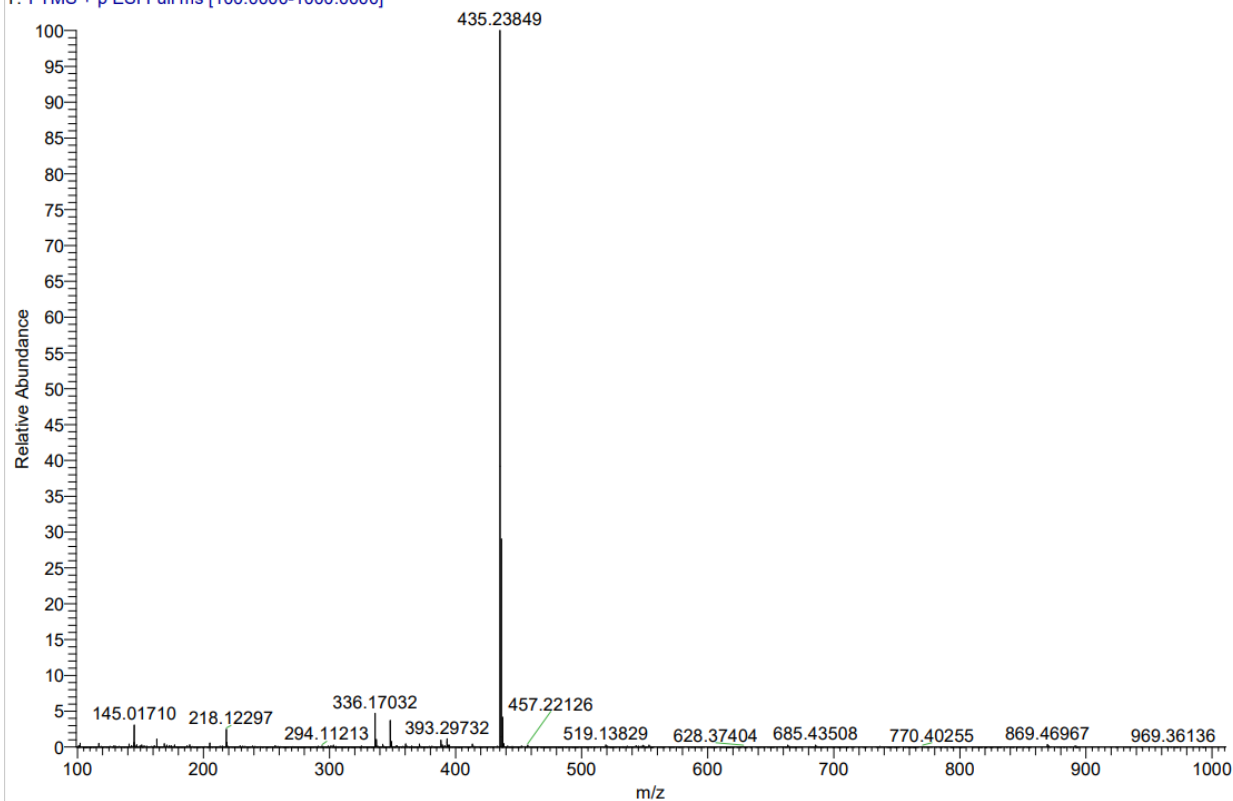

Figure S85. HR-MS spectrum of **13b** (mass accuracy of -1.3 ppm)

7-Chloro-N-(2-(dimethylamino)ethyl)-3-(morpholinomethyl)-4-oxo-1,4-dihydroquinoline-2-carboxamide (**13c**):

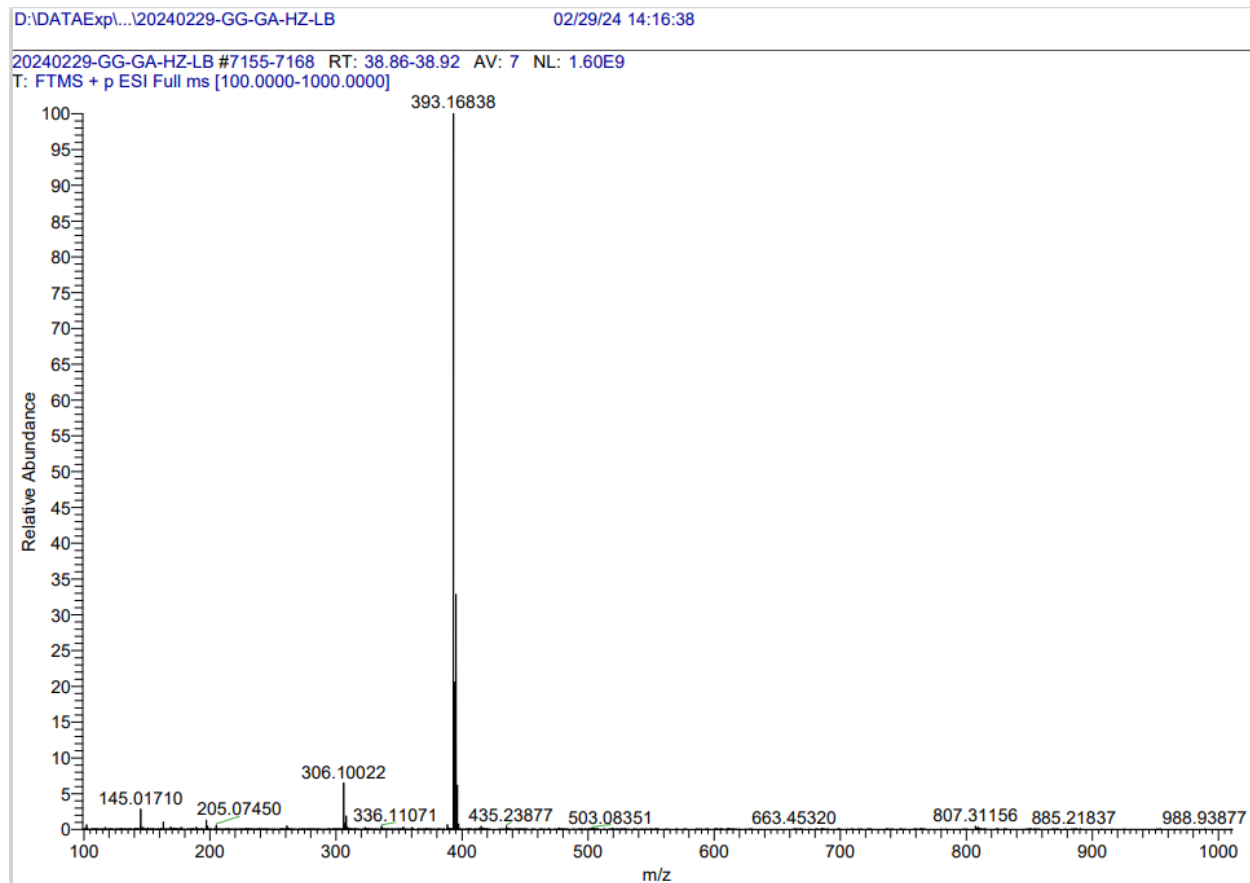

Figure S86. HR-MS spectrum of **13c** (mass accuracy of -1.1 ppm)

*N*-(2-(dimethylamino)ethyl)-8-methyl-3-(morpholinomethyl)-4-oxo-1,4-dihydroquinoline-2-carboxamide (**13d**):

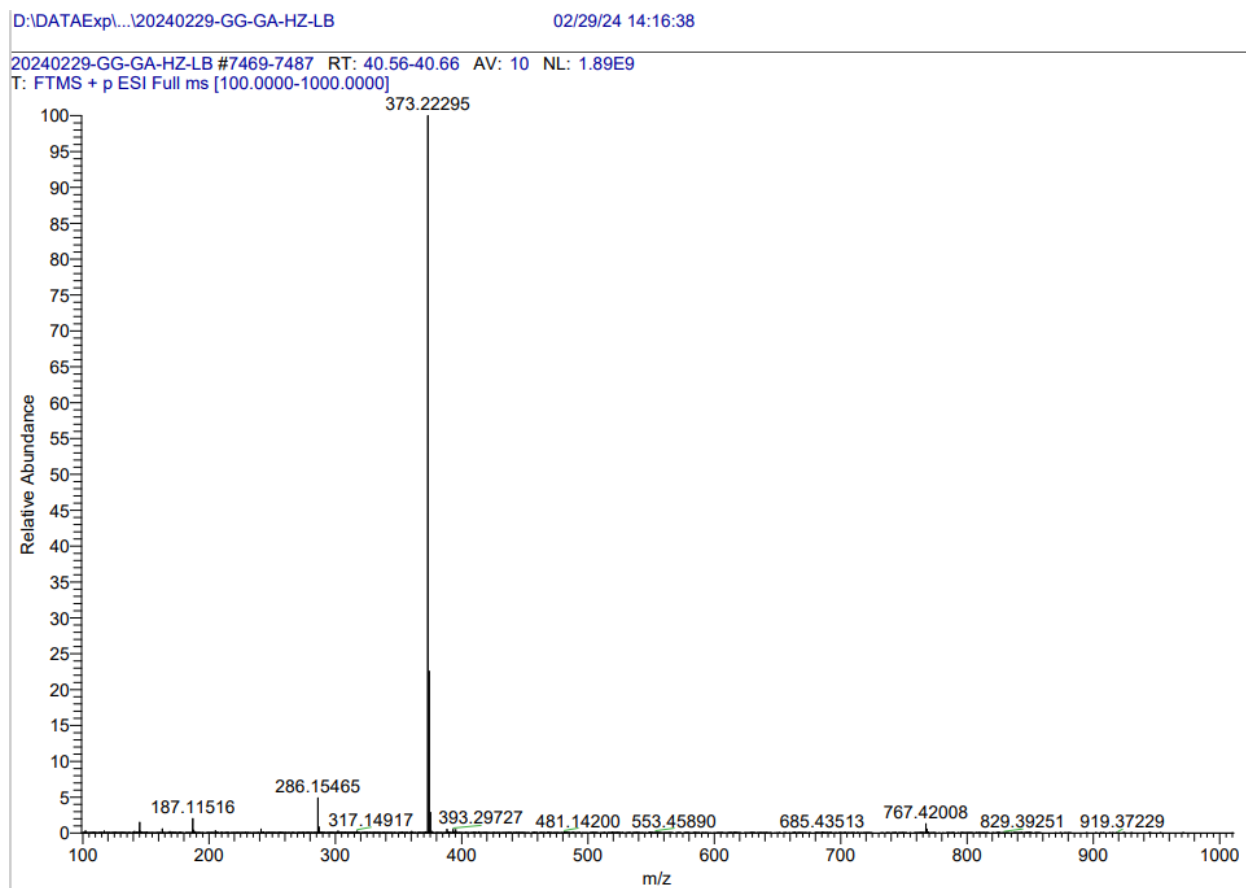

Figure S87. HR-MS spectrum of **13d** (mass accuracy of -1.3 ppm)

2-(2-(Dimethylamino)ethyl)-1H-pyrrolo[3,4-b]quinoline-3,9(2H,4H)-dione (**4**):

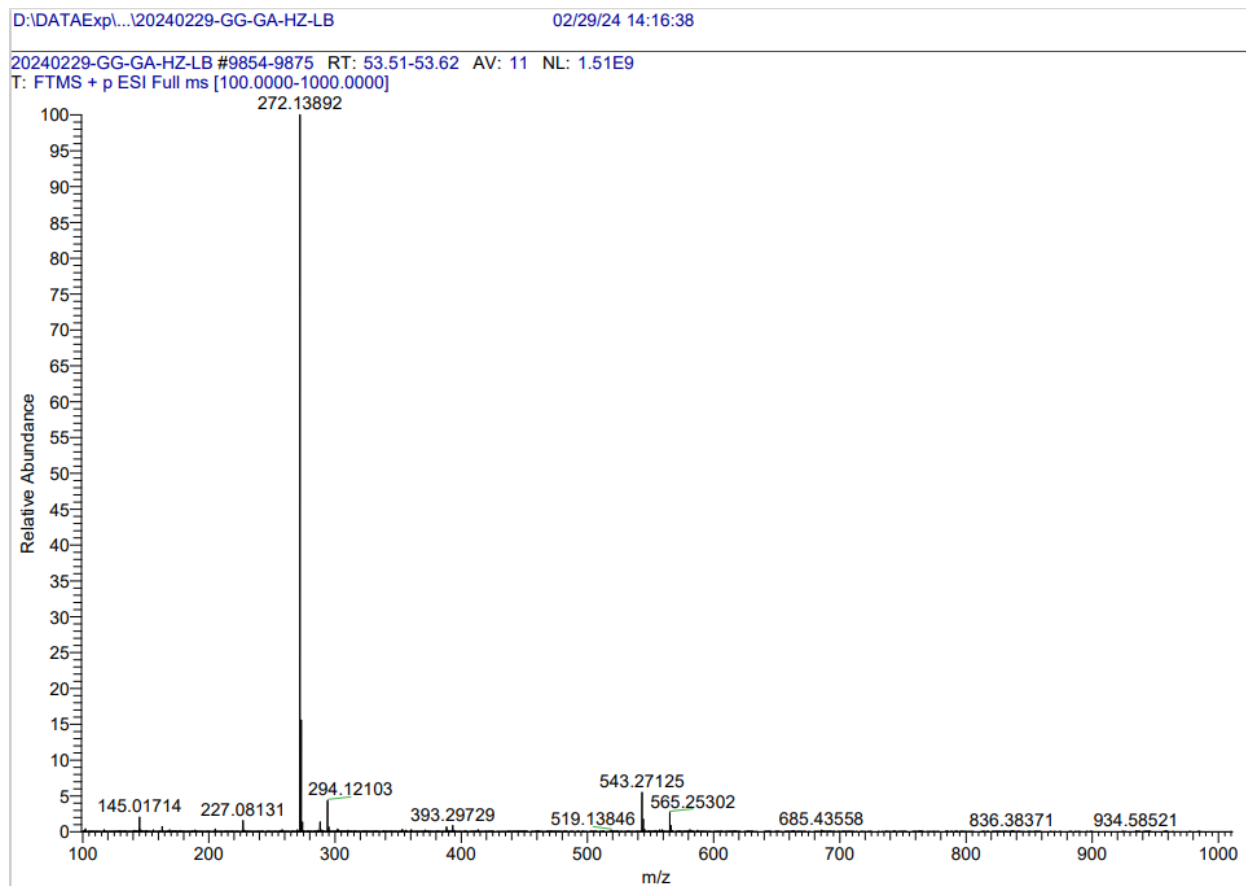

Figure S88. HR-MS spectrum of **4** (mass accuracy of -1.6 ppm)



2-(3-(Dimethylamino)propyl)-1H-pyrrolo[3,4-b]quinoline-3,9(2H,4H)-dione (**9e**):

D:\DATAExp\...20240229-GG-GA-HZ-LB

02/29/24 14:16:38

20240229-GG-GA-HZ-LB #12918-12938 RT: 70.14-70.24 AV: 10 NL: 1.38E9

T: FTMS + p ESI Full ms [100.0000-1000.0000]

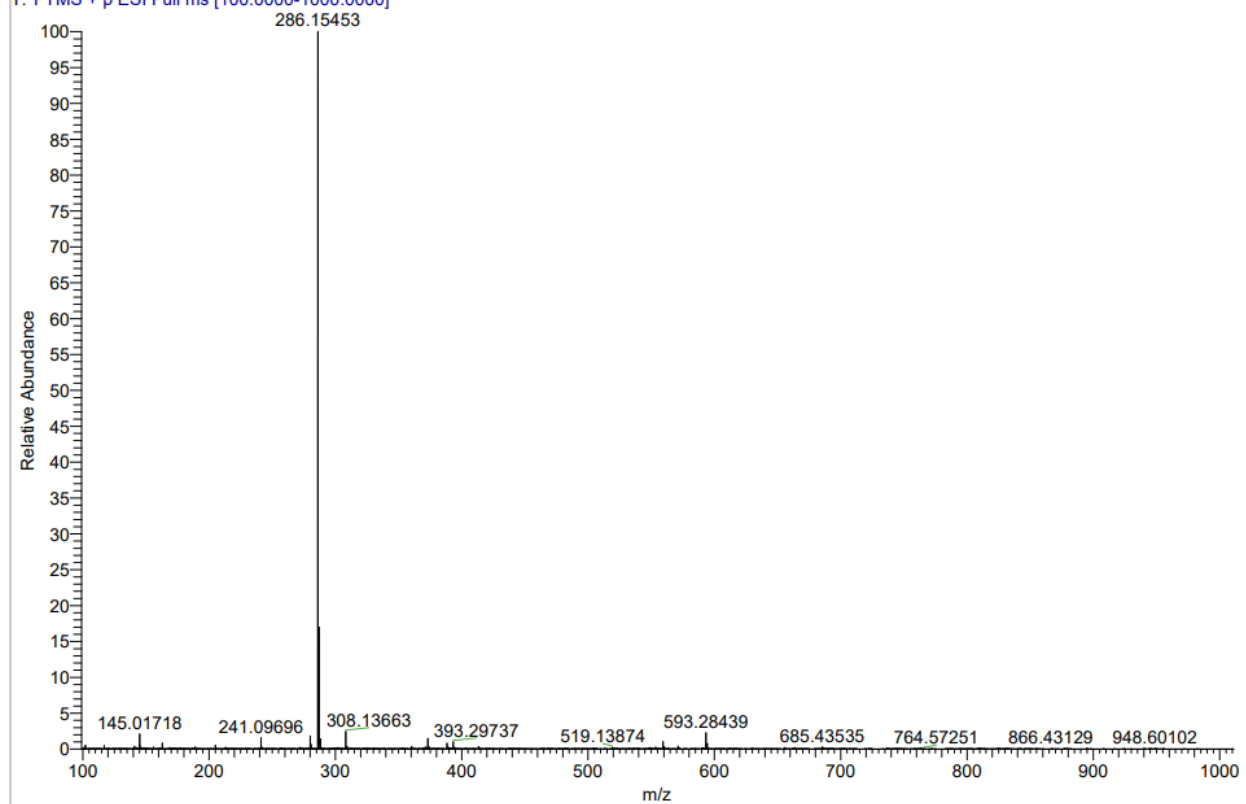

Figure S89. HR-MS spectrum of **9e** (mass accuracy of -1.7 ppm)

2-(2-(Pyrrolidin-1-yl)ethyl)-1H-pyrrolo[3,4-b]quinoline-3,9(2H,4H)-dione (**9f**):

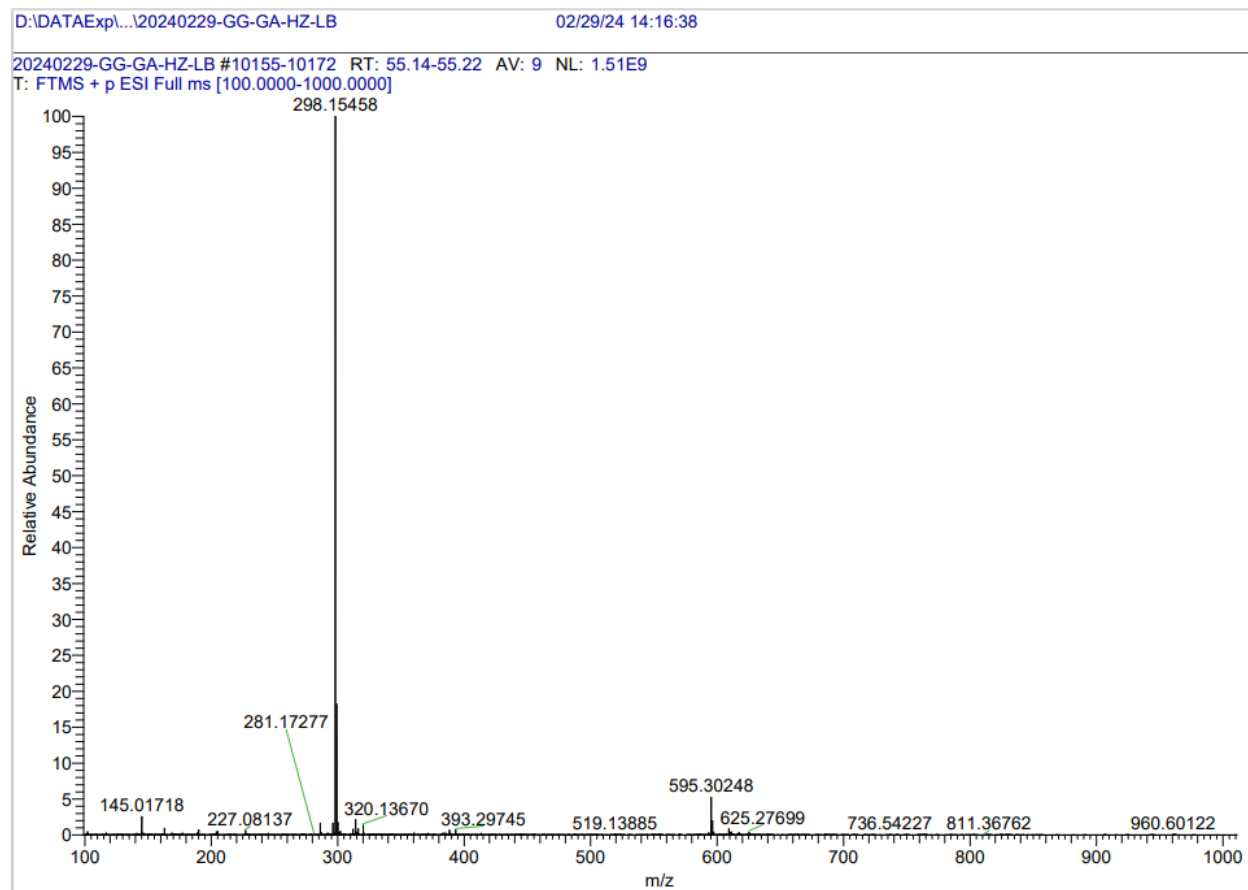

Figure S90. HR-MS spectrum of **9f** (mass accuracy of -1.4 ppm)

*8-Chloro-2-(2-(dimethylamino)ethyl)-1H-pyrrolo[3,4-b]quinoline-3,9(2H,4H)-dione (14a)*:

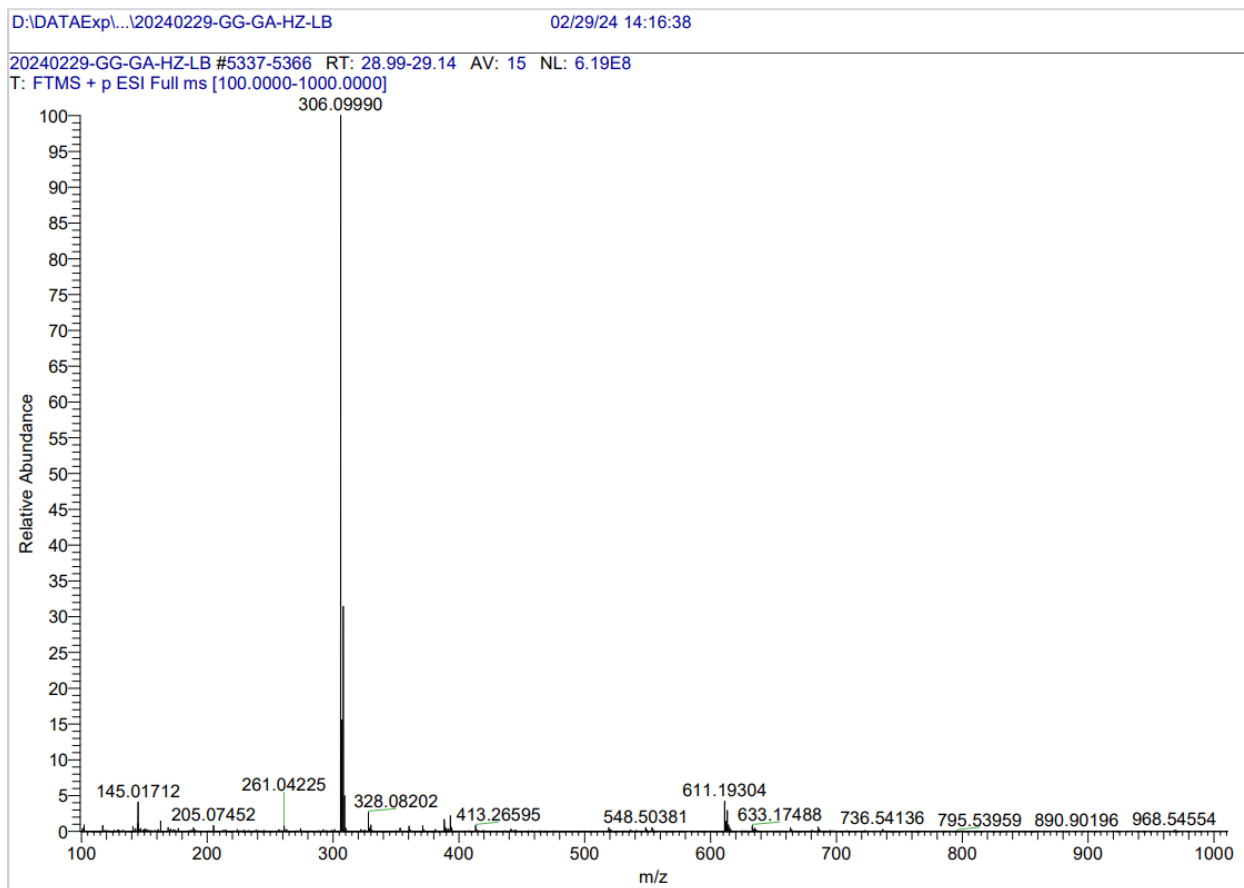

Figure S91. HR-MS spectrum of **14a** (mass accuracy of -1.6 ppm)

6-Chloro-2-(2-(dimethylamino)ethyl)-1H-pyrrolo[3,4-b]quinoline-3,9(2H,4H)-dione (**14c**):

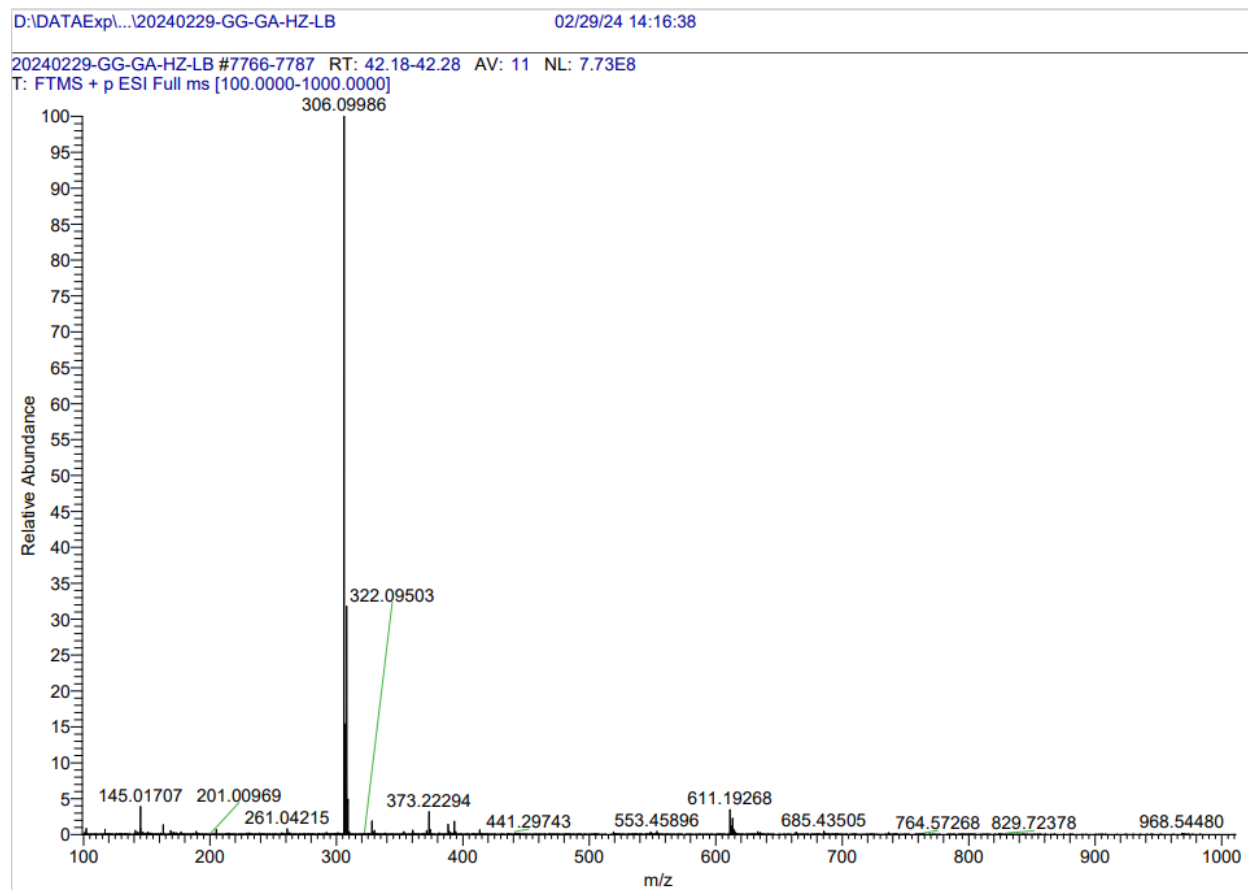

Figure S92. HR-MS spectrum of **14c** (mass accuracy of -1.7 ppm)

2-(2-(Dimethylamino)ethyl)-5-methyl-1H-pyrrolo[3,4-b]quinoline-3,9(2H,4H)-dione (**14d**):

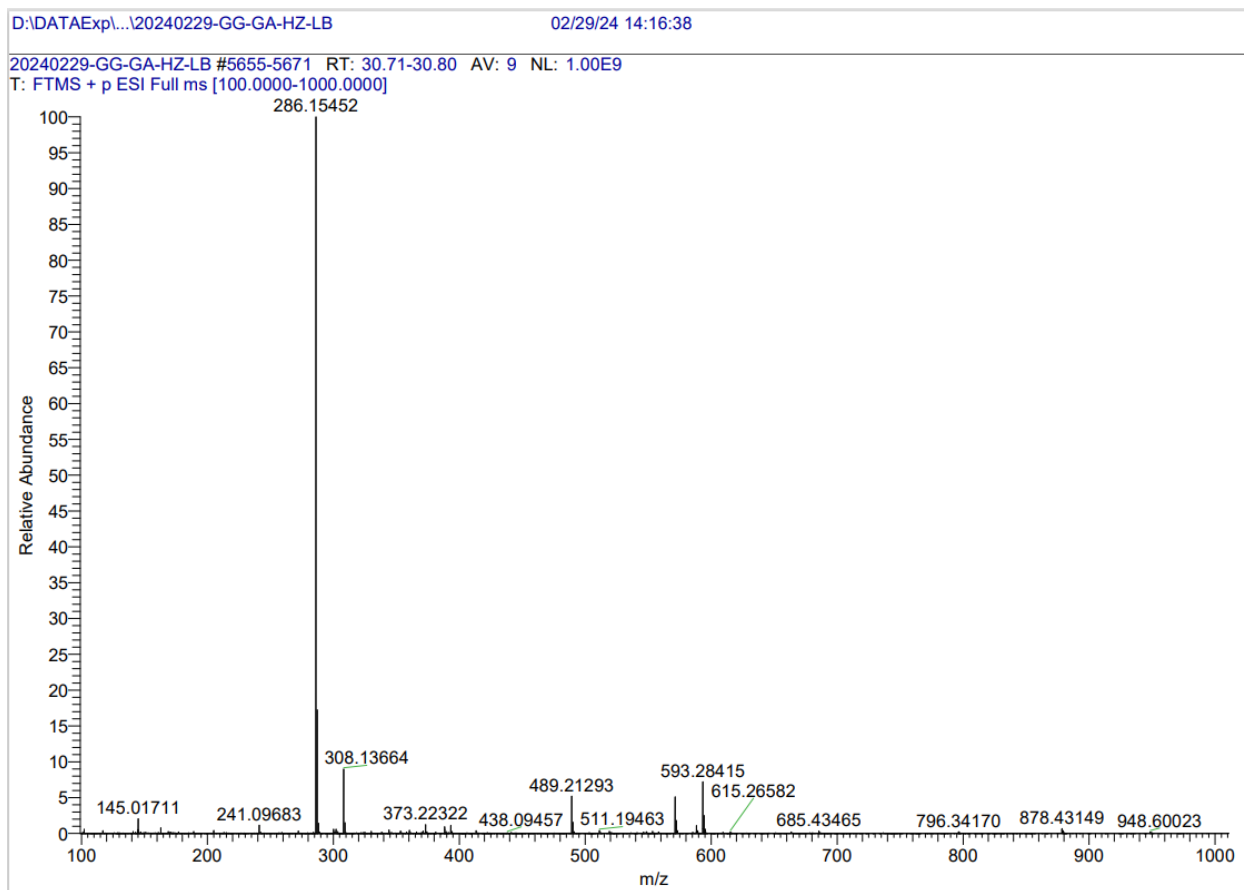

Figure S93. HR-MS spectrum of **14d** (mass accuracy of -1.7 ppm)

*3,3'-Methylenebis(4-oxo-N-phenyl-1,4-dihydroquinoline-2-carboxamide)* (**10a**):

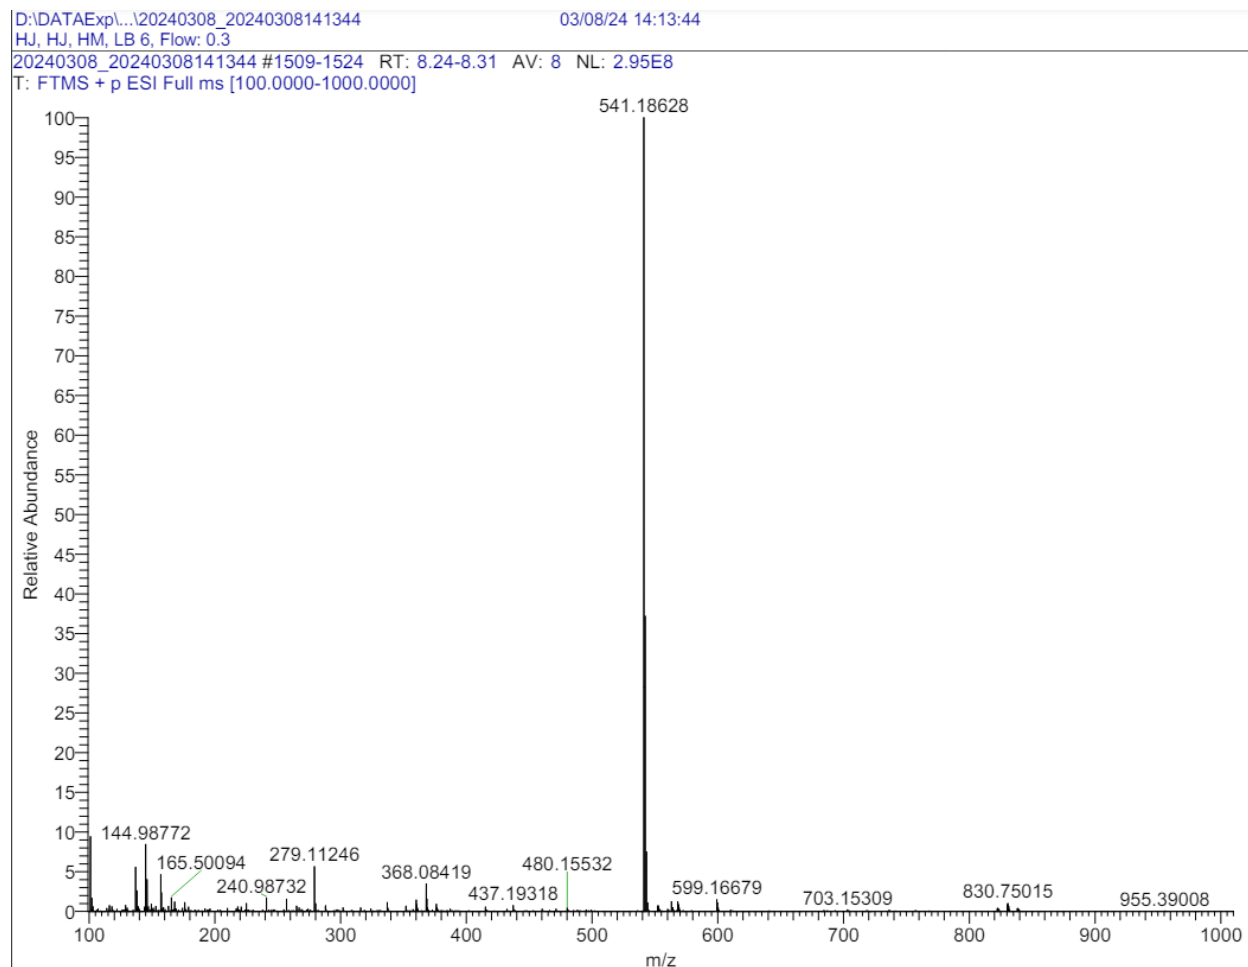

Figure S94. HR-MS spectrum of **10a** (mass accuracy of -1.4 ppm)

*3,3'-Methylenebis(N-benzyl-4-oxo-1,4-dihydroquinoline-2-carboxamide)* (**10b**):

D:\DATA\Exp\...20240308\_20240308141344

03/08/24 14:13:44

HJ, HJ, HM, LB 6, Flow: 0.3

20240308\_20240308141344 #2442-2452 RT: 13.34-13.38 AV: 5 NL: 3.06E8

T: FTMS + p ESI Full ms [100.0000-1000.0000]

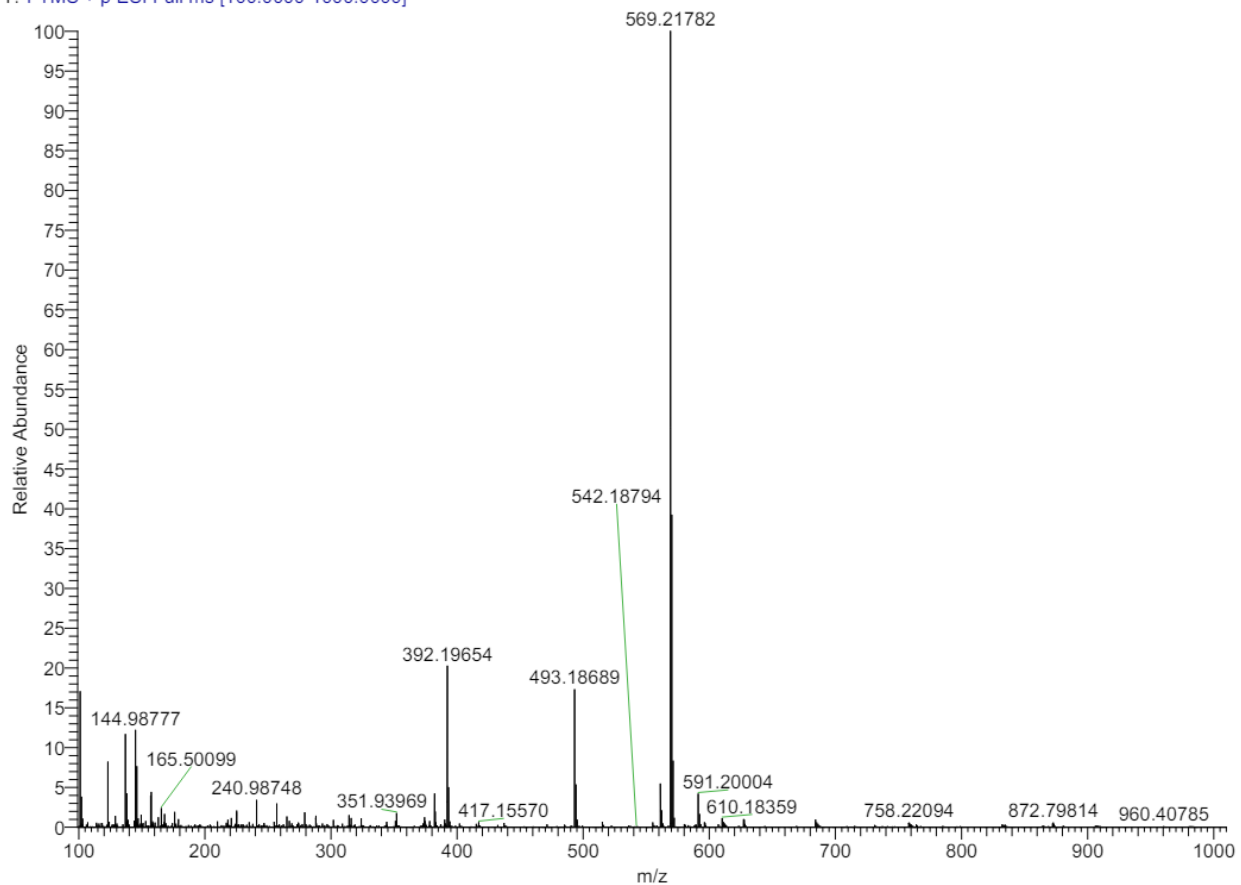

Figure S95. HR-MS spectrum of **10b** (mass accuracy of -0.9 ppm)

*3,3'-Methylenebis(4-oxo-N-propyl-1,4-dihydroquinoline-2-carboxamide)* (**10d**):

D:\DATAExp\...20240308\_20240308141344 03/08/24 14:13:44  
HJ, HJ, HM, LB 6, Flow: 0.3  
20240308\_20240308141344 #2738-2752 RT: 14.96-15.02 AV: 7 NL: 5.69E8  
T: FTMS + p ESI Full ms [100.0000-1000.0000]

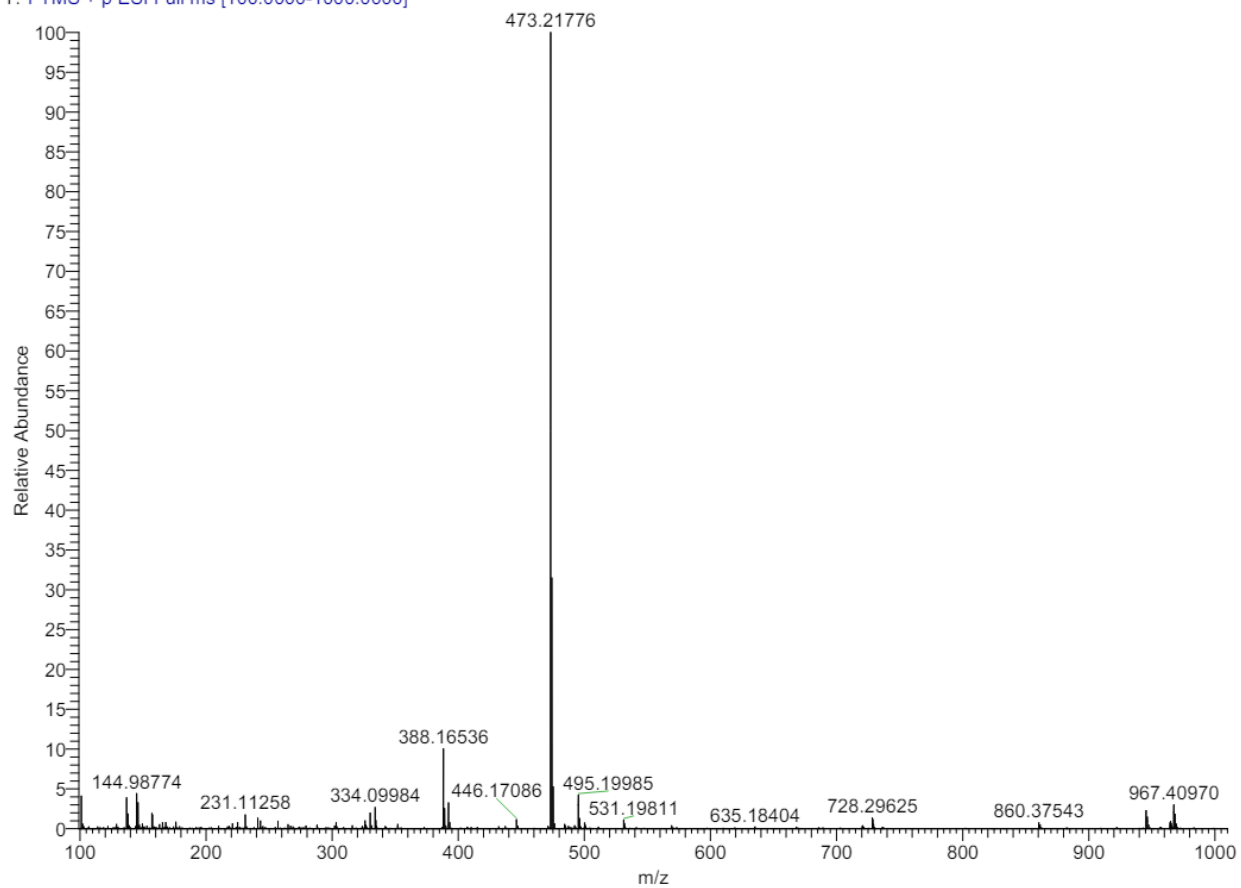

Figure S96. HR-MS spectrum of **10d** (mass accuracy of -1.2 ppm)



*3,3'-Methylenebis(5-chloro-N-(2-(dimethylamino)ethyl)-4-oxo-1,4-dihydroquinoline-2-carboxamide) (15a)*:

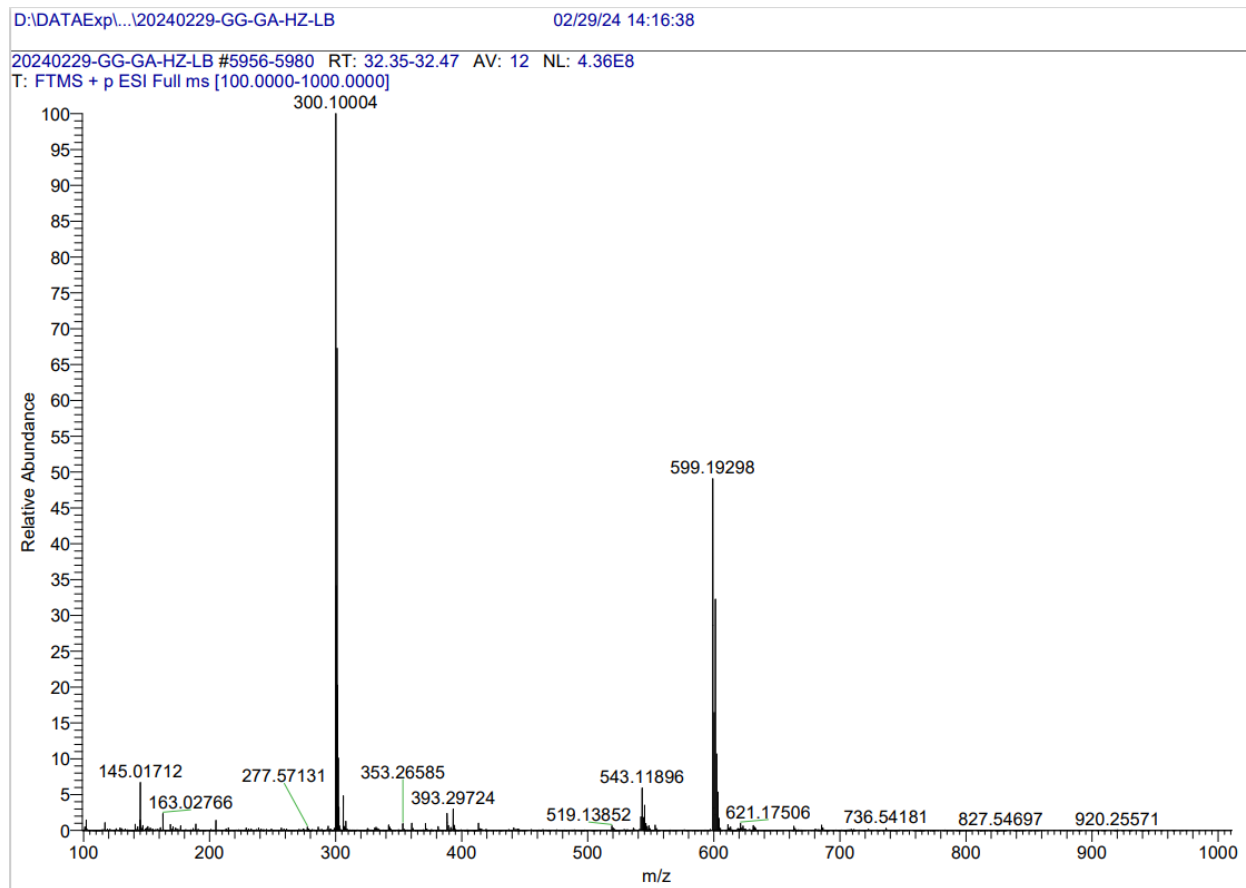

Figure S97. HR-MS spectrum of **15a** (mass accuracy of -0.8 ppm)

*3,3'-Methylenebis(7-chloro-N-(2-(dimethylamino)ethyl)-4-oxo-1,4-dihydroquinoline-2-carboxamide) (15c):*

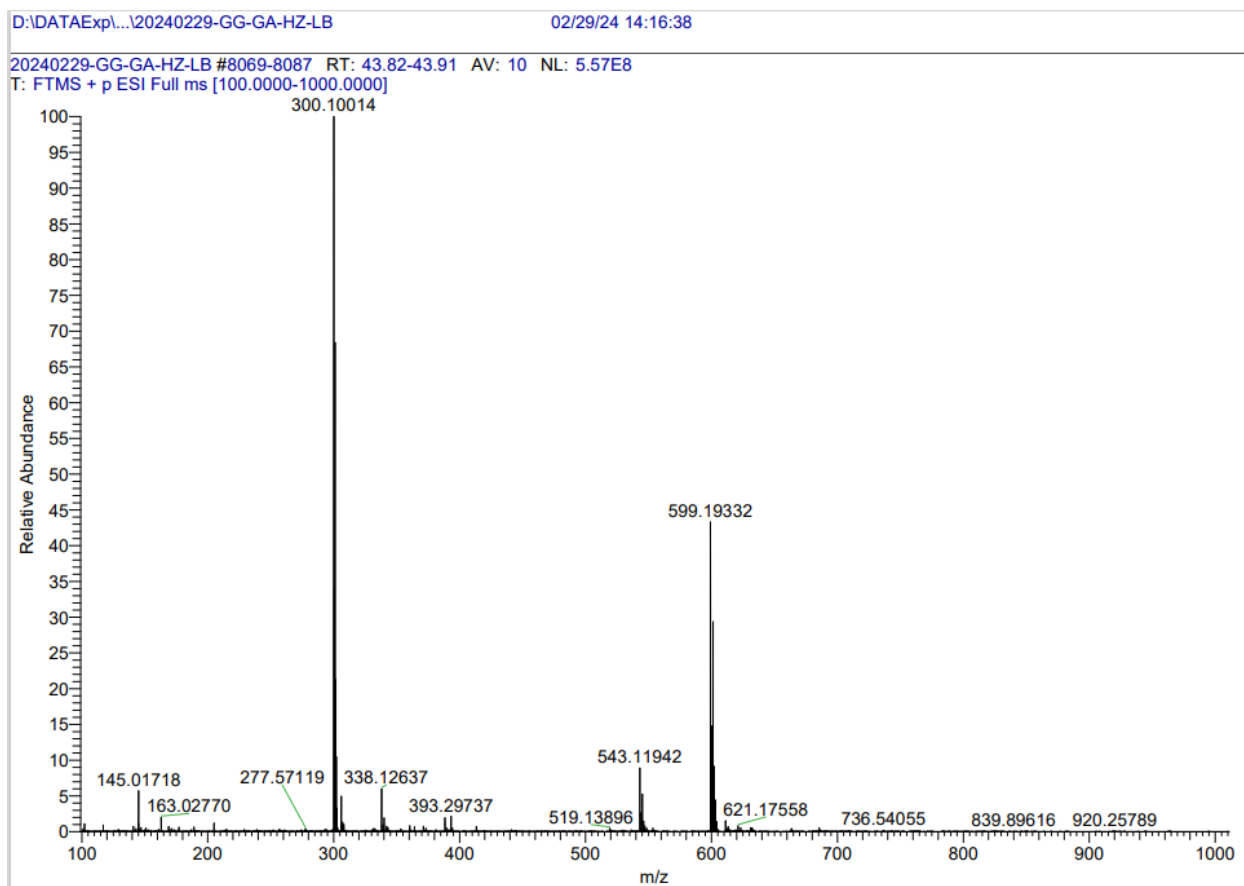

Figure S98. HR-MS spectrum of **15c** (mass accuracy of -0.3 ppm)
